# Supplementary material for: [5C + 1N] Annulation of 2,4-pentadienenitriles with hydroxylamine: a synthetic route to multi-substituted 2-aminopyridines
Source: Royal Society of Chemistry journal article supplement (doi:10.1039/c2ob27053f), 2012-12-07

# [5C + 1N] Annulation of 2,4-Pentadienenitriles with Hydroxylamine: A Synthetic Route to Multi-substituted 2-Aminopyridines

Xiaoqing Xin,<sup>a</sup> Peng Huang,<sup>a</sup> Dexuan Xiang,<sup>a</sup> Rui Zhang,<sup>\*,a,b</sup> Fengyu Zhao,<sup>a</sup> Ning Zhang,<sup>a</sup>  
and Dewen Dong<sup>\*,a,b</sup>

<sup>a</sup> Changchun Institute of Applied Chemistry, Chinese Academy of Sciences, Changchun,  
130022, P. R. China

<sup>b</sup> Changzhou Institute of Energy Storage Materials & Devices, Changzhou, 213000, P. R.  
China

E-mail: dwdong@ciac.jl.cn

## Supporting Information

Copies of NMR spectra for compounds **2a-u** .....S2-S43

## Copies of NMR spectra for compounds 2a-u

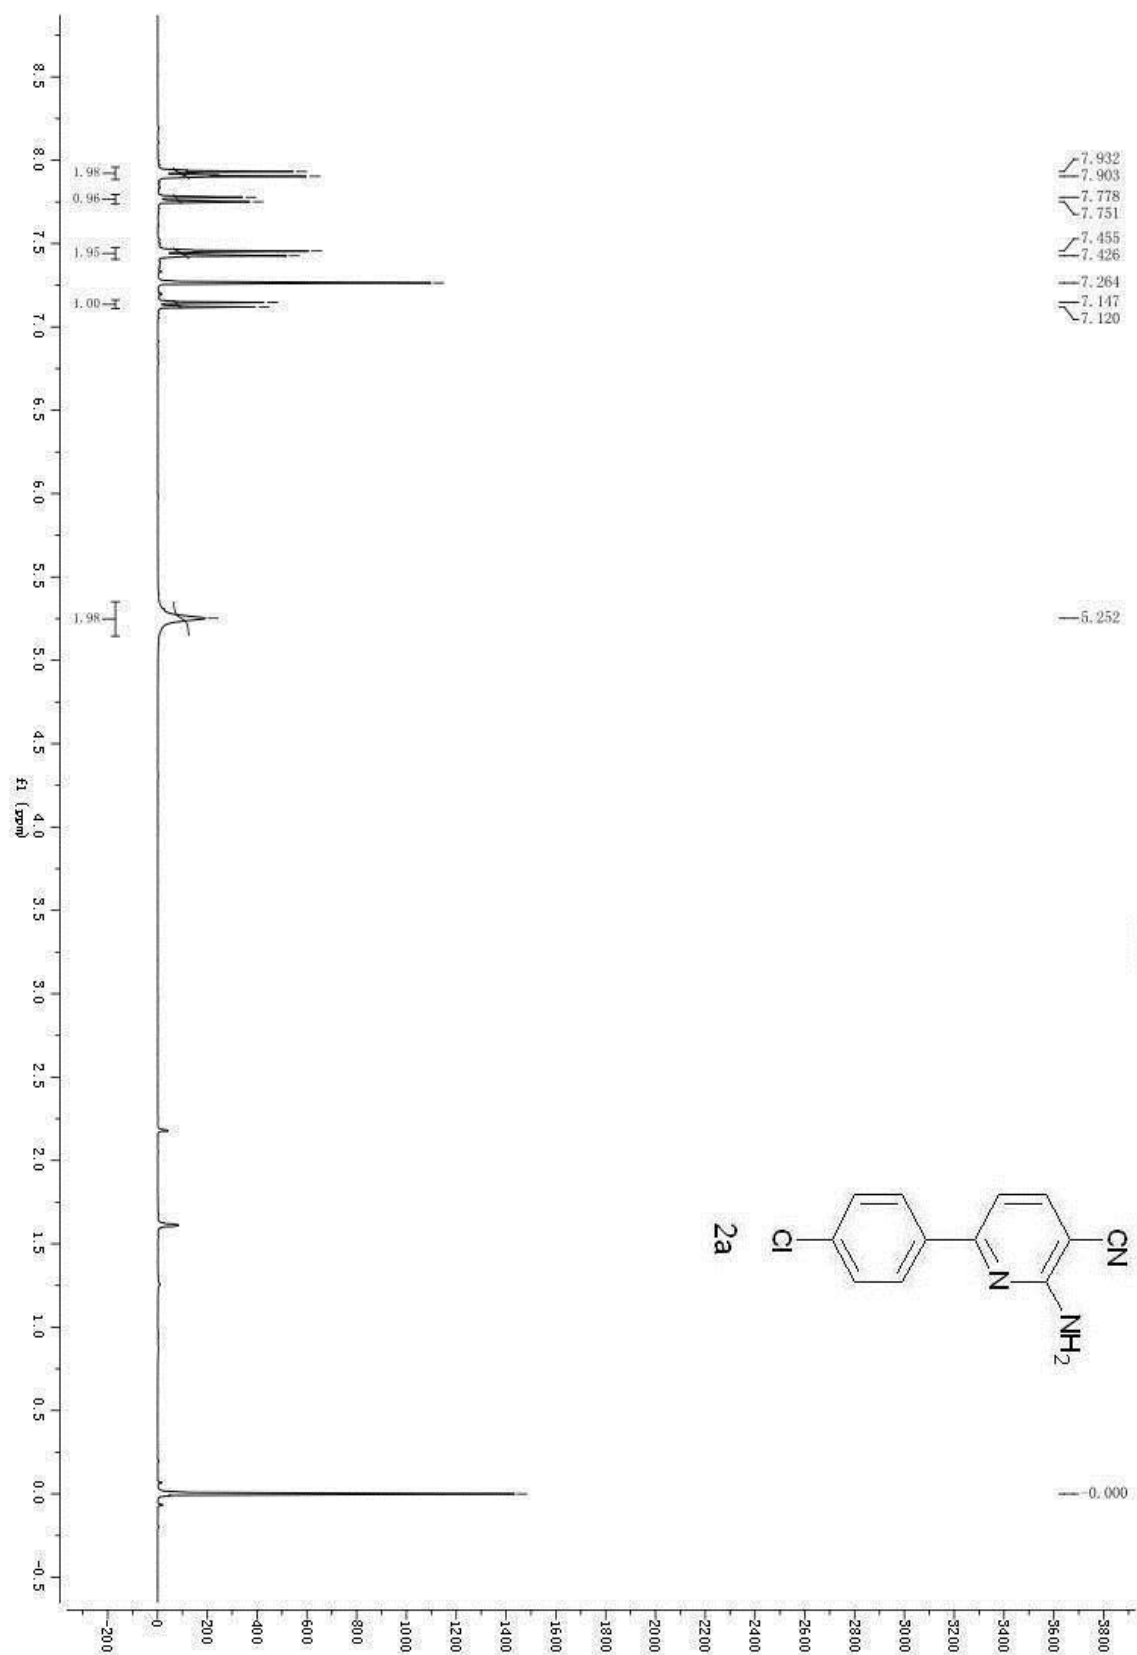

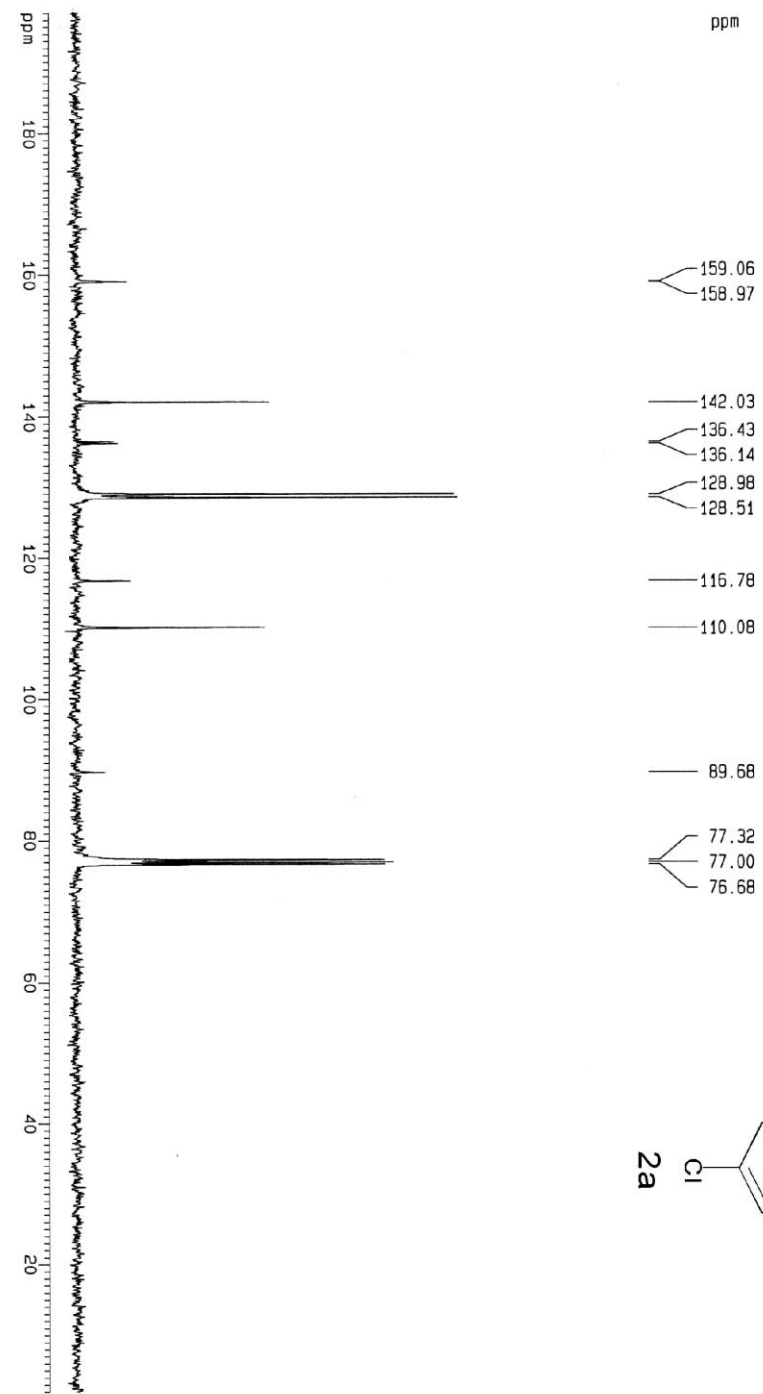

xxxxB

Current Data Parameters:

|        |     |
|--------|-----|
| NAME   | XXB |
| EXPNO  | 8   |
| PROCNO | 1   |

F2 - Acquisition Parameters

|         |                |
|---------|----------------|
| Date_   | 20101221       |
| Time    | 0.12           |
| INSTRUM | av400          |
| PROBHD  | 5 mm BBO BB-1H |
| PULPROG | zgpg           |
| TD      | 16384          |
| SOLVENT | CDCl3          |
| NS      | 1398           |
| DS      | 0              |
| SWH     | 25062.656 Hz   |
| FIDRES  | 1.929703 Hz    |
| AQ      | 0.3266108 sec  |
| RG      | 8192           |
| DM      | 19.950 usec    |
| DE      | 6.00 usec      |
| TE      | 300.0 K        |
| D1      | 0.69999999 sec |
| d11     | 0.03000000 sec |

----- CHANNEL f1 -----

|      |                 |
|------|-----------------|
| NUC1 | <sup>13</sup> C |
| P1   | 2.80 usec       |
| PL1  | -3.00 dB        |
| SFO1 | 100.5785254 MHz |

----- CHANNEL f2 -----

|         |                 |
|---------|-----------------|
| CPDPRG2 | Waltz16         |
| NUC2    | <sup>1</sup> H  |
| PCPD2   | 80.00 usec      |
| PL2     | -2.00 dB        |
| PL12    | 19.50 dB        |
| SFO2    | 399.9613998 MHz |

F2 - Processing parameters

|     |                 |
|-----|-----------------|
| SF  | 65536           |
| SF  | 100.5675122 MHz |
| WDW | EM              |
| SSB | 0               |
| LB  | 7.00 Hz         |
| GB  | 0               |
| PC  | 1.00            |

1D NMR plot parameters

|       |                 |
|-------|-----------------|
| CX    | 22.00 cm        |
| CY    | 7.00 cm         |
| F1P   | 197.148 ppm     |
| F1    | 19826.71 Hz     |
| F2P   | 1.957 ppm       |
| F2    | 196.80 Hz       |
| PPMCK | 8.87234 ppm/cm  |
| HZCM  | 892.26880 Hz/cm |

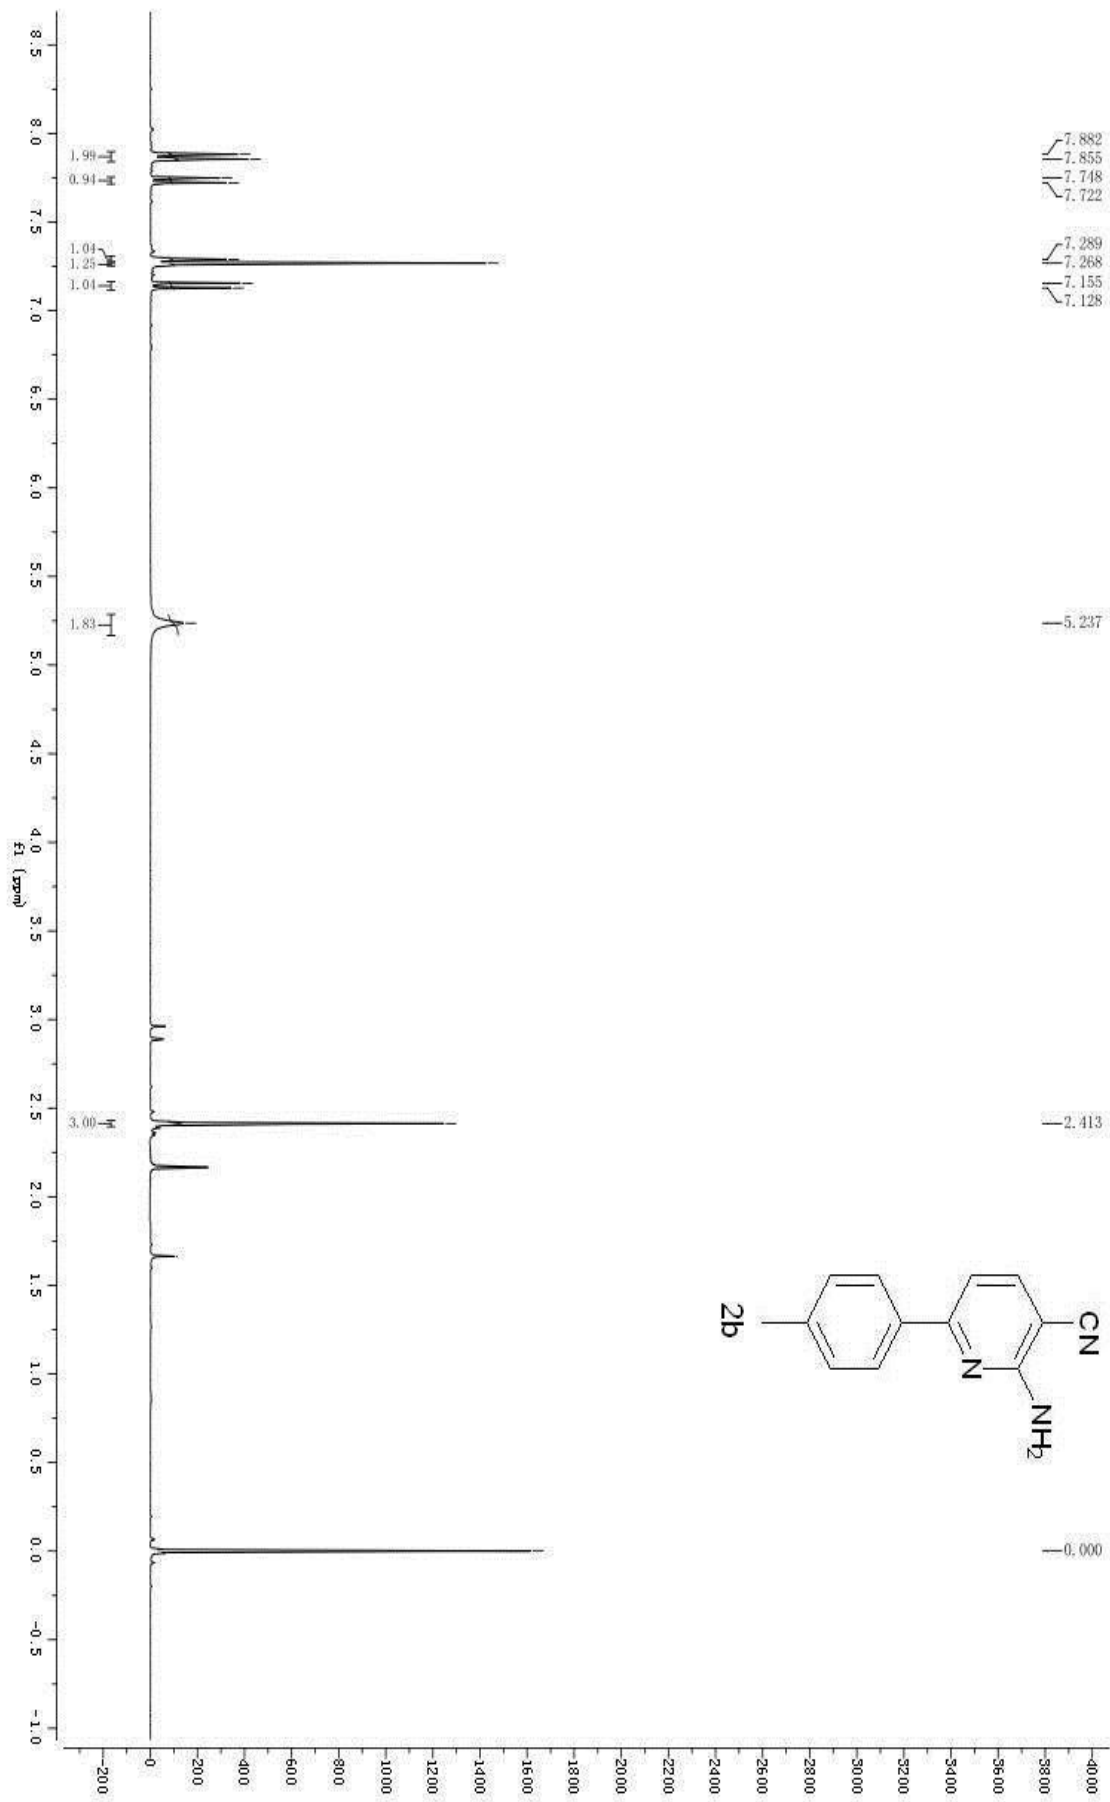

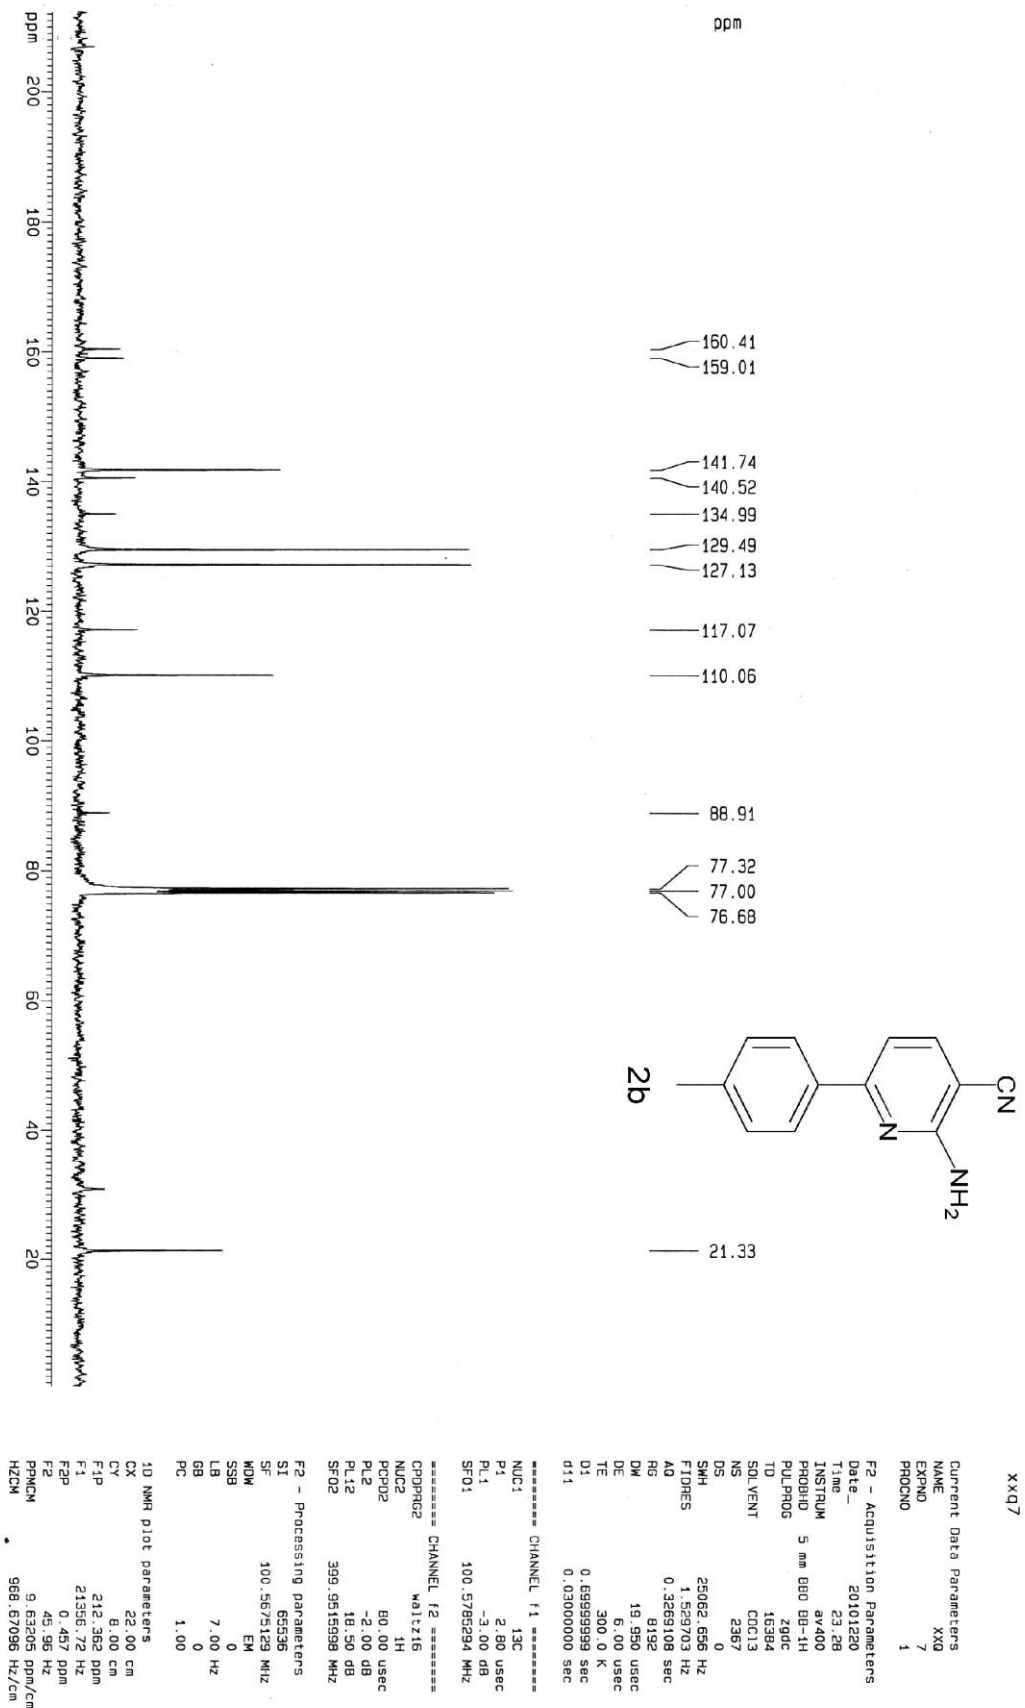

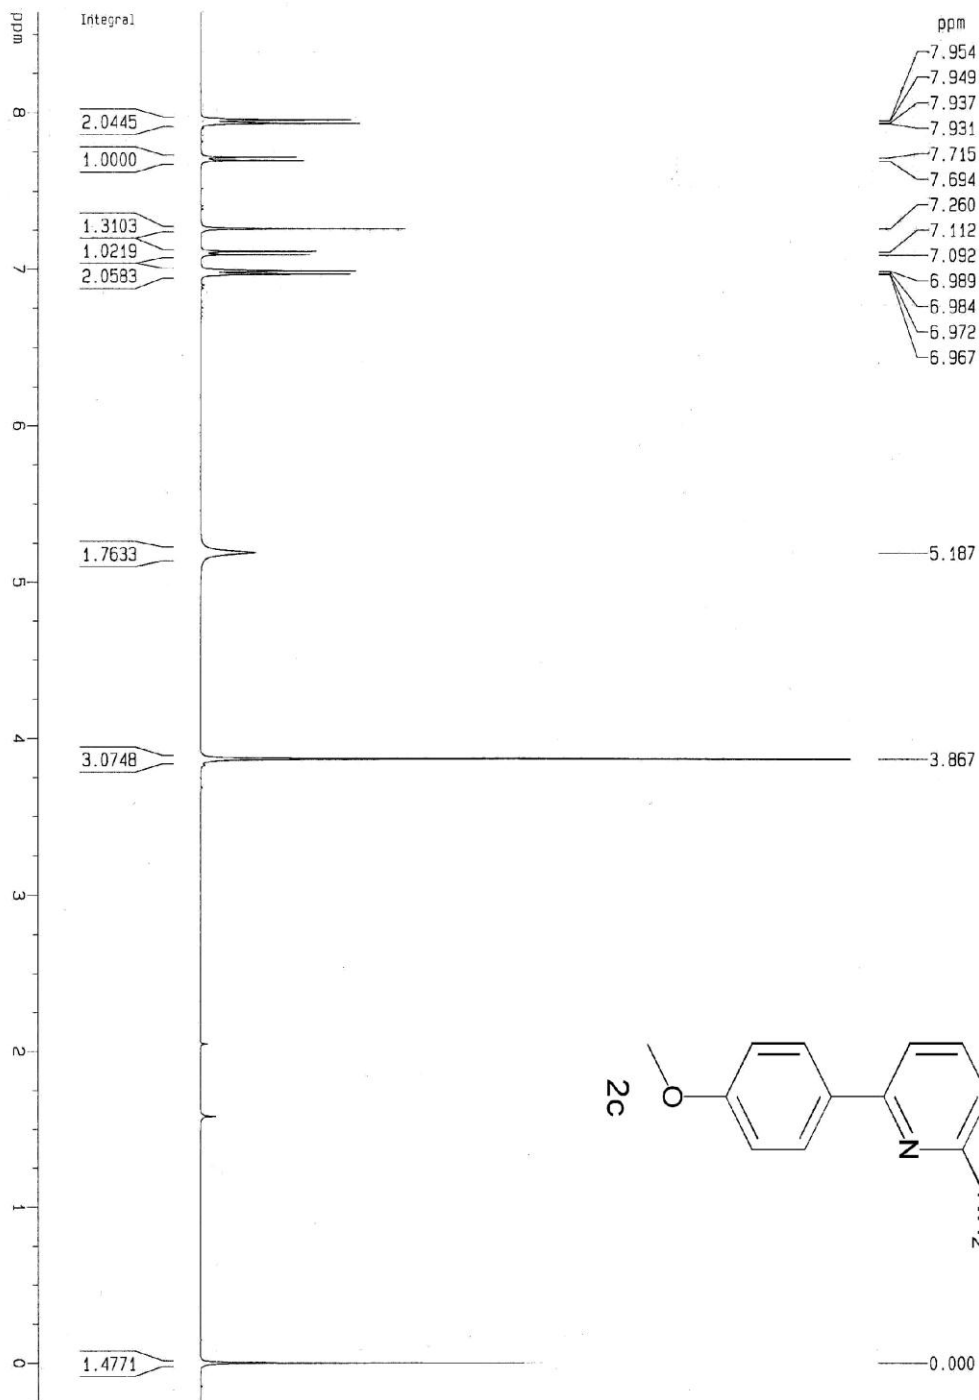

XXQ1-19H

Current Data Parameters  
 NAME XXX  
 EXPNO 1  
 PROCNO 1

F2 - Acquisition Parameters  
 Date\_ 20110119  
 Time 22.05  
 INSTRUM av400  
 PROBNM 5 mm BBO BB-1H  
 PULPROG zg  
 TD 16384  
 SOLVENT CDCl3  
 NS 8  
 DS 0  
 SWH 4401.409 Hz  
 FIDRES 0.268841 Hz  
 AQ 1.8612725 sec  
 RG 128  
 DW 113.600 usec  
 DE 5.00 usec  
 TE 300.0 K  
 D1 10.00000000 sec

\*\*\*\*\* CHANNEL f1 \*\*\*\*\*  
 NUC1 1H  
 P1 8.50 usec  
 PL1 -2.00 dB  
 SFO1 399.9517683 MHz

F2 - Processing parameters  
 SI 65536  
 SF 399.9500104 MHz  
 KMDK EX  
 SSB 0  
 LB 0.50 Hz  
 GB 0  
 PC 1.00

1D NMR plot parameters  
 CX 22.00 cm  
 CY 12.00 cm  
 F1P 8.543 ppm  
 F1 3456.91 Hz  
 F2P -100.71 Hz  
 F2 40433.000000000000 Hz/cm  
 HZCM 161.70979 Hz/cm

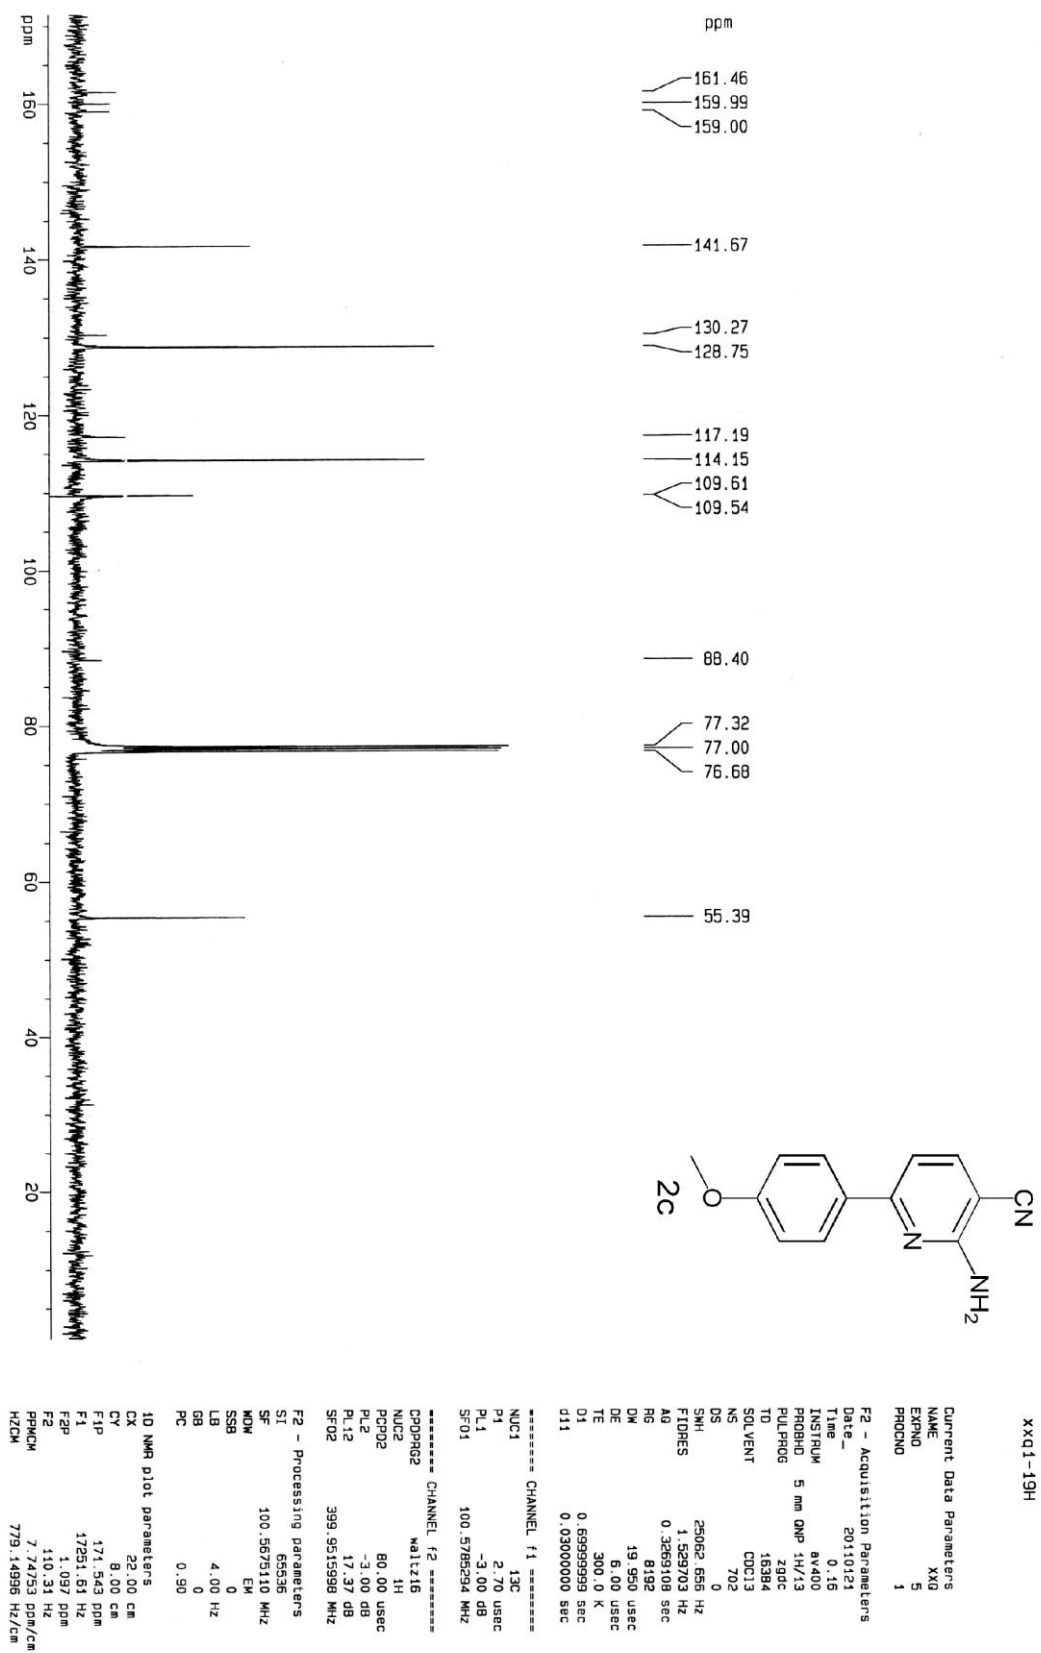

XXQ1-19H

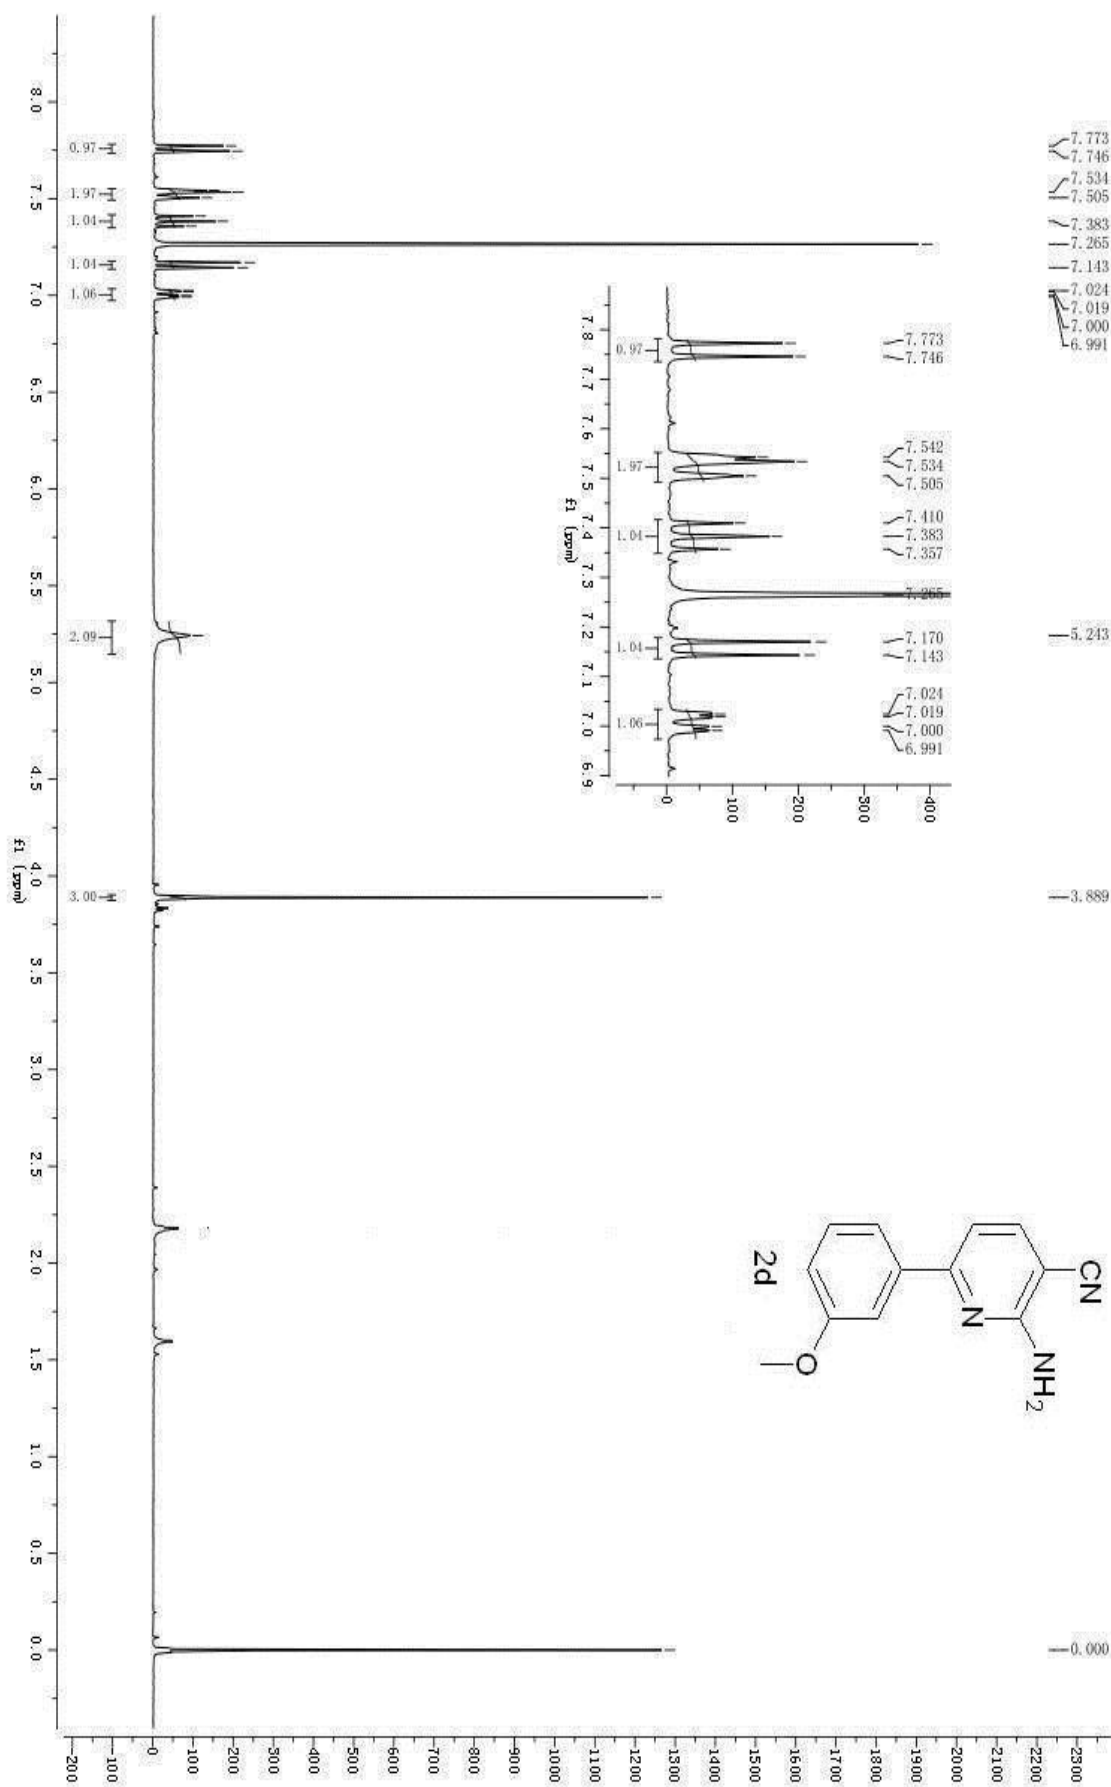



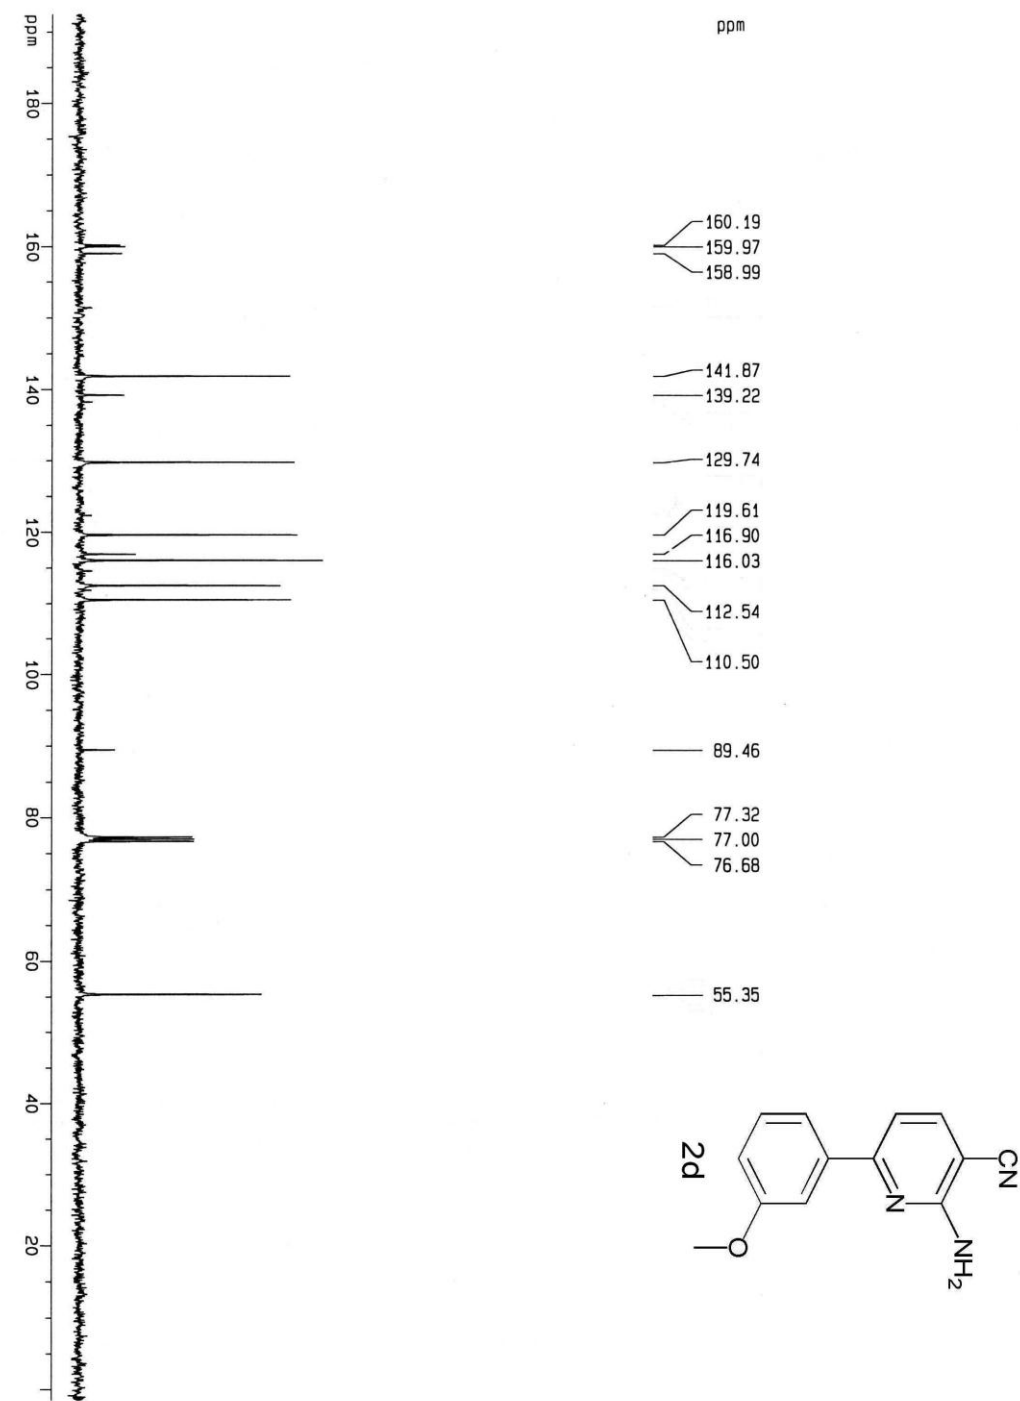

xxq1-20-1

Current Data Parameters  
 NAME XXJ  
 EXPNO 6  
 PROCNO 1

F2 - Acquisition Parameters  
 Date\_ 20110121  
 Time 0.38  
 INSTRUM av400  
 PROBHD 5 mm QNP 1H/13  
 PULPROG zgpg30  
 TD 16384  
 SOLVENT CDCl3  
 NS 712  
 DS 2  
 SH 25062.658 Hz  
 FIDRES 1.529703 Hz  
 AQ 0.3289108 sec  
 RG 8192  
 DM 19.950 usec  
 DE 6.00 usec  
 TE 300.0 K  
 D1 0.69999999 sec  
 d11 0.03000000 sec

\*\*\*\*\* CHANNEL f1 \*\*\*\*\*  
 NUC1 13C  
 P1 2.70 usec  
 PL1 -3.00 dB  
 SF01 100.578294 MHz

\*\*\*\*\* CHANNEL f2 \*\*\*\*\*  
 CPDPRG2 waltz16  
 NUC2 1H  
 PCPD2 80.00 usec  
 PL2 -3.00 dB  
 PL12 17.37 dB  
 SF02 399.9515998 MHz

F2 - Processing parameters  
 SI 65536  
 SF 100.5675148 MHz  
 MOW EM  
 MSB 0  
 LB 4.00 Hz  
 BB 0  
 PC 0.50

1D NMR plot parameters  
 CX 22.00 cm  
 CY 8.00 cm  
 F1p 192.487 ppm  
 F1 19357.98 Hz  
 F2p -1.524 ppm  
 F2 -153.23 Hz  
 PPMCM 8.81869 ppm/cm  
 HZCM 886.87329 Hz/cm

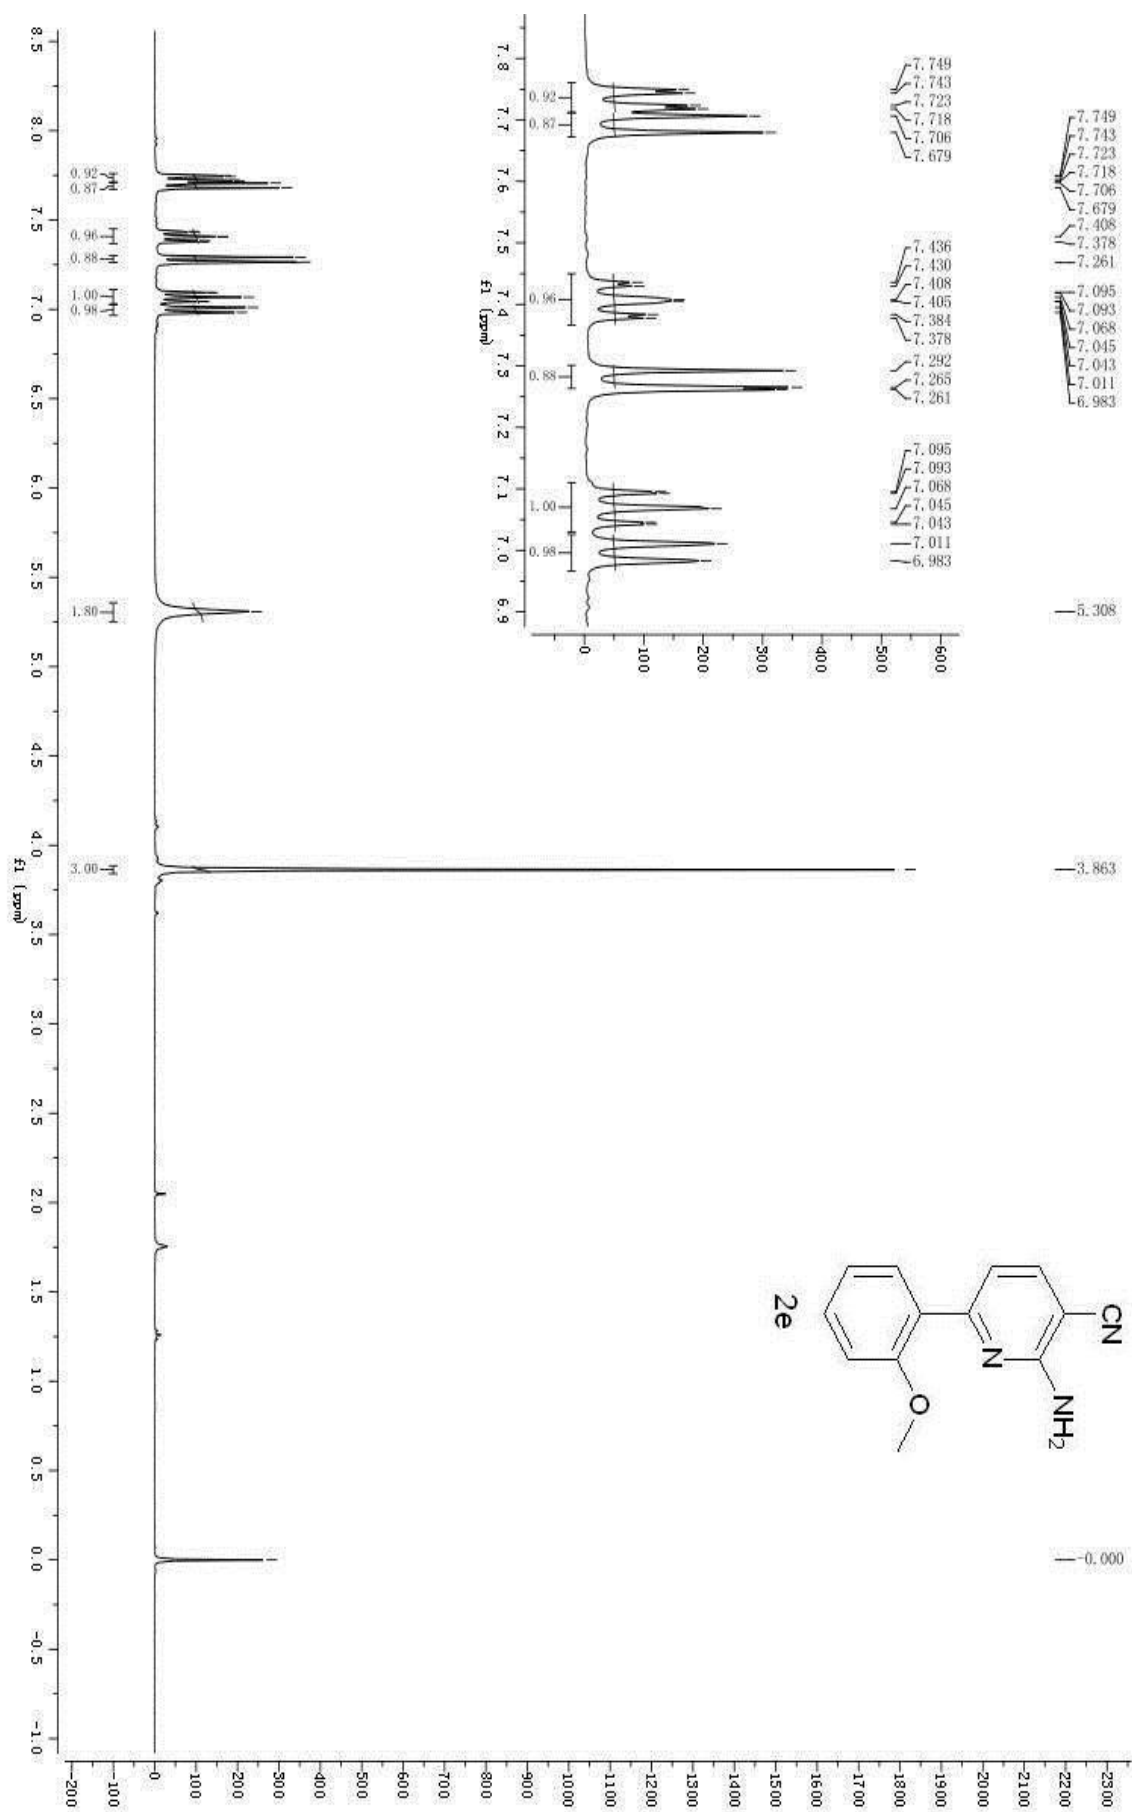

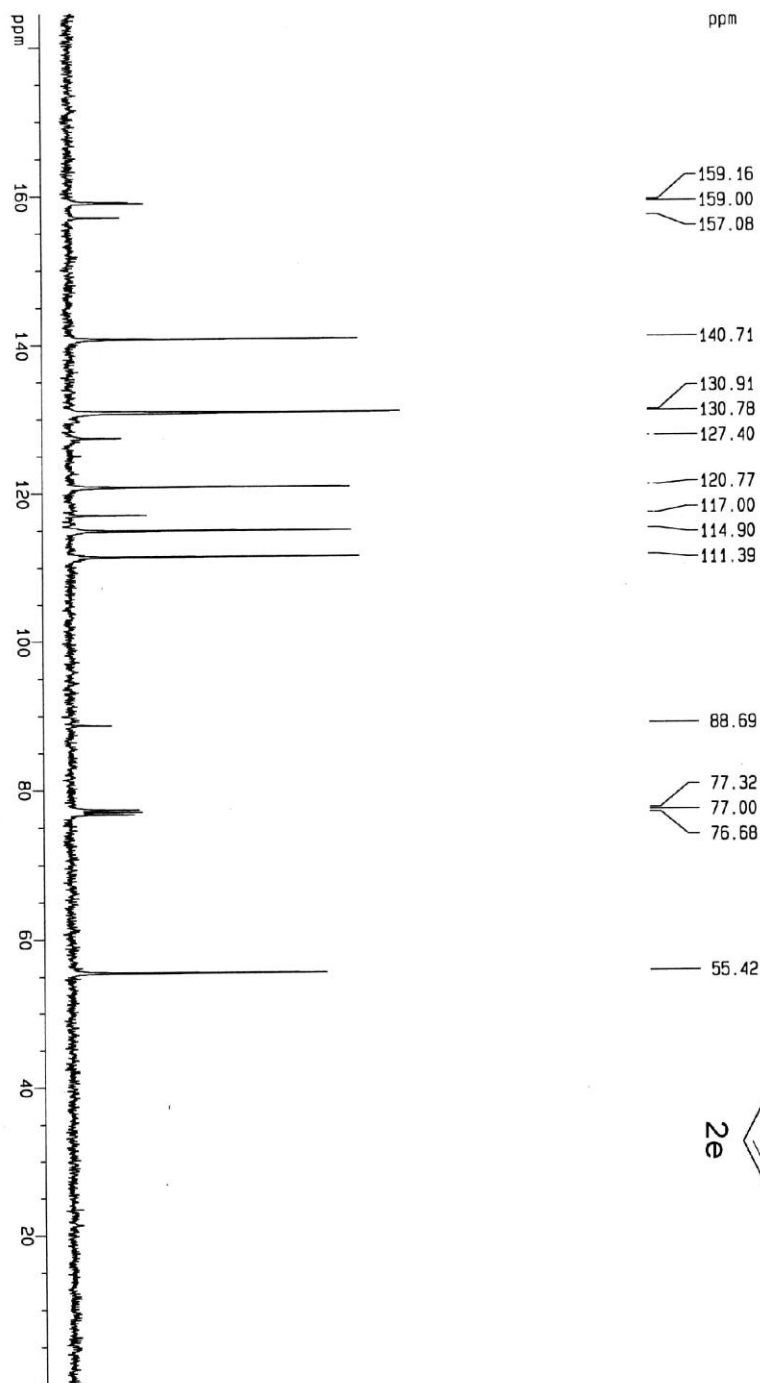

Current Data Parameters  
 NAME XXQ  
 EXPNO 4  
 PROCNO 1

F2 - Acquisition Parameters  
 Date\_ 20110120  
 Time 21.33  
 INSTRUM 4000  
 PROBNM 5 mm QNP 1H/13  
 PULPROG zgpg  
 TD 16384  
 SOLVENT CDCl3  
 NS 102  
 DS 0  
 SMH 25062.656 Hz  
 FIDRES 1.529703 Hz  
 AQ 0.3269108 sec  
 RG 8192  
 DM 19.950 usec  
 DE 6.00 usec  
 TE 300.0 K  
 D1 0.69999999 sec  
 D11 0.03000000 sec

===== CHANNEL f1 =====  
 NUC1 13C  
 P1 2.70 usec  
 PL1 -3.00 dB  
 SFO1 100.5785294 MHz

===== CHANNEL f2 =====  
 CPDPRG2 waltz16  
 NUC2 1H  
 PCPD2 80.00 usec  
 PL2 -3.00 dB  
 PL12 17.37 dB  
 SFO2 399.9515998 MHz

F2 - Processing parameters  
 S1 65536  
 SF 100.5675275 MHz  
 NQW EM  
 SSB 0  
 LB 4.00 Hz  
 GB 0  
 PC 0.90

1D NMR Plot parameters  
 CX 22.00 cm  
 CY 6.00 cm  
 F1P 184.614 ppm  
 F1 18565.21 Hz  
 F2P -0.035 ppm  
 F2 -3.53 Hz  
 PPMCM 8.39316 ppm/cm  
 HZCM 844.07916 Hz/cm

xxq1-20-2

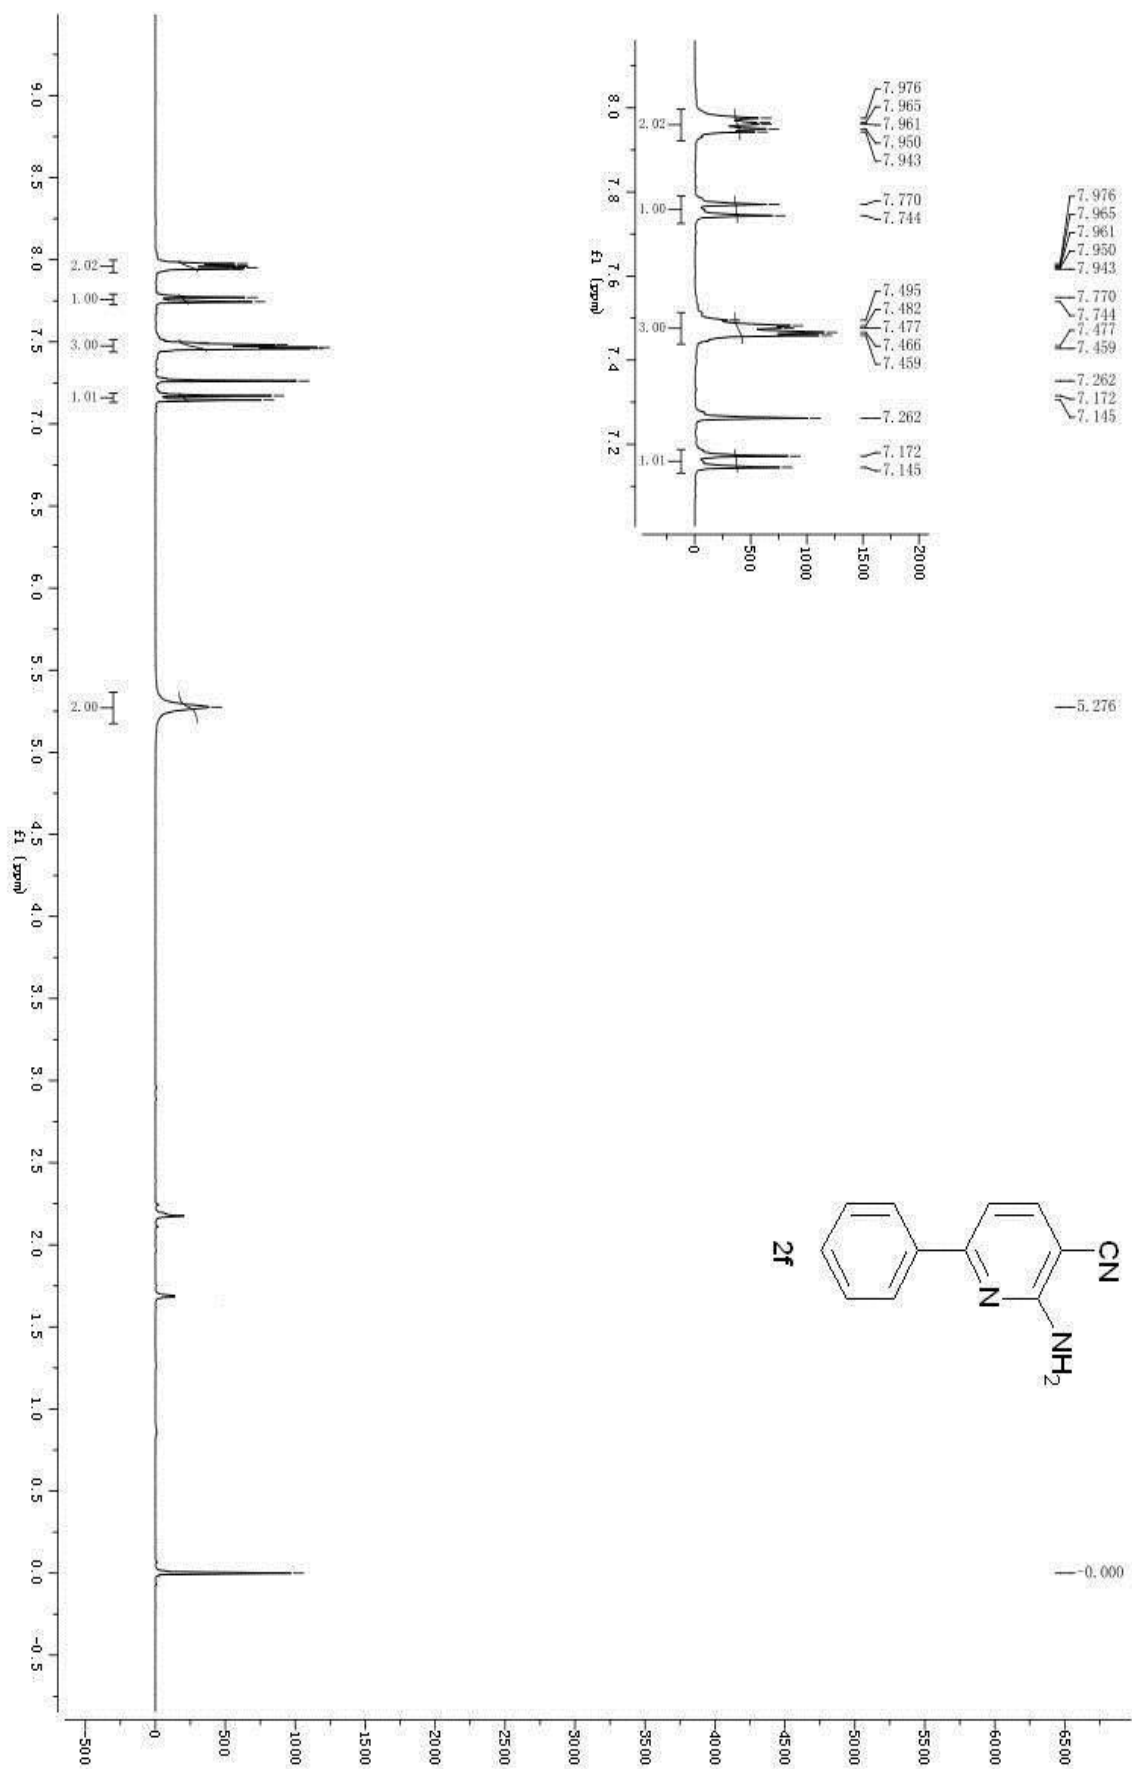

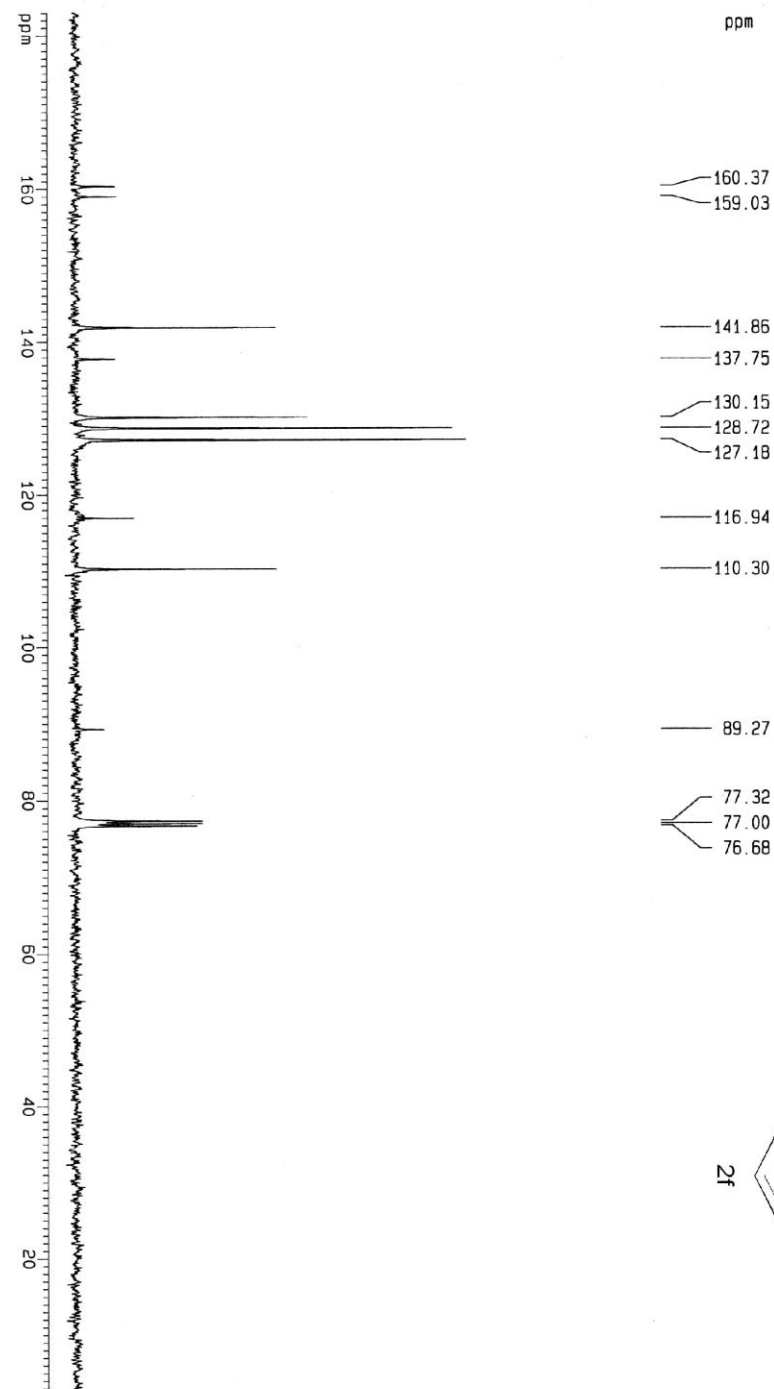

xxxxb

Current Data Parameters

|        |     |
|--------|-----|
| NAME   | XXB |
| EXPNO  | 6   |
| PROCNO | 1   |

F2 - Acquisition Parameters

|         |                |
|---------|----------------|
| Date_   | 20101220       |
| Time    | 23.19          |
| INSTRUM | av400          |
| PROBHD  | 5 mm BBO BB-1H |
| PULPROG | zgpg           |
| TD      | 16384          |
| SOLVENT | CDCl3          |
| NS      | 168            |
| DS      | 0              |
| SMH     | 25062.656 Hz   |
| FIDRES  | 1.529703 Hz    |
| AQ      | 0.3269108 sec  |
| RG      | 8192           |
| DM      | 19.950 usec    |
| DE      | 6.00 usec      |
| TE      | 300.0 K        |
| D1      | 0.69999999 sec |
| d11     | 0.03000000 sec |

===== CHANNEL f1 =====

|      |                 |
|------|-----------------|
| NUC1 | <sup>13</sup> C |
| P1   | 2.80 usec       |
| PL1  | -3.00 dB        |
| SFO1 | 100.5795294 MHz |

===== CHANNEL f2 =====

|         |                 |
|---------|-----------------|
| CPDPRG2 | waltz16         |
| NUC2    | <sup>1</sup> H  |
| PCPD2   | 80.00 usec      |
| PL2     | -2.00 dB        |
| PL12    | 19.50 dB        |
| SFO2    | 399.9515999 MHz |

F2 - Processing parameters

|     |                 |
|-----|-----------------|
| SF  | 65536           |
| SF  | 100.5675187 MHz |
| WDW | EM              |
| SSB | 0               |
| LB  | 7.00 Hz         |
| GB  | 0               |
| PC  | 1.00            |

10 NMR plot parameters.

|       |                 |
|-------|-----------------|
| CX    | 22.00 cm        |
| CY    | 7.00 cm         |
| F1P   | 183.056 ppm     |
| F1    | 18409.50 Hz     |
| F2P   | 2.788 ppm       |
| F2    | 280.34 Hz       |
| PPMCM | 8.19402 ppm/cm  |
| HZCM  | 824.05267 Hz/cm |

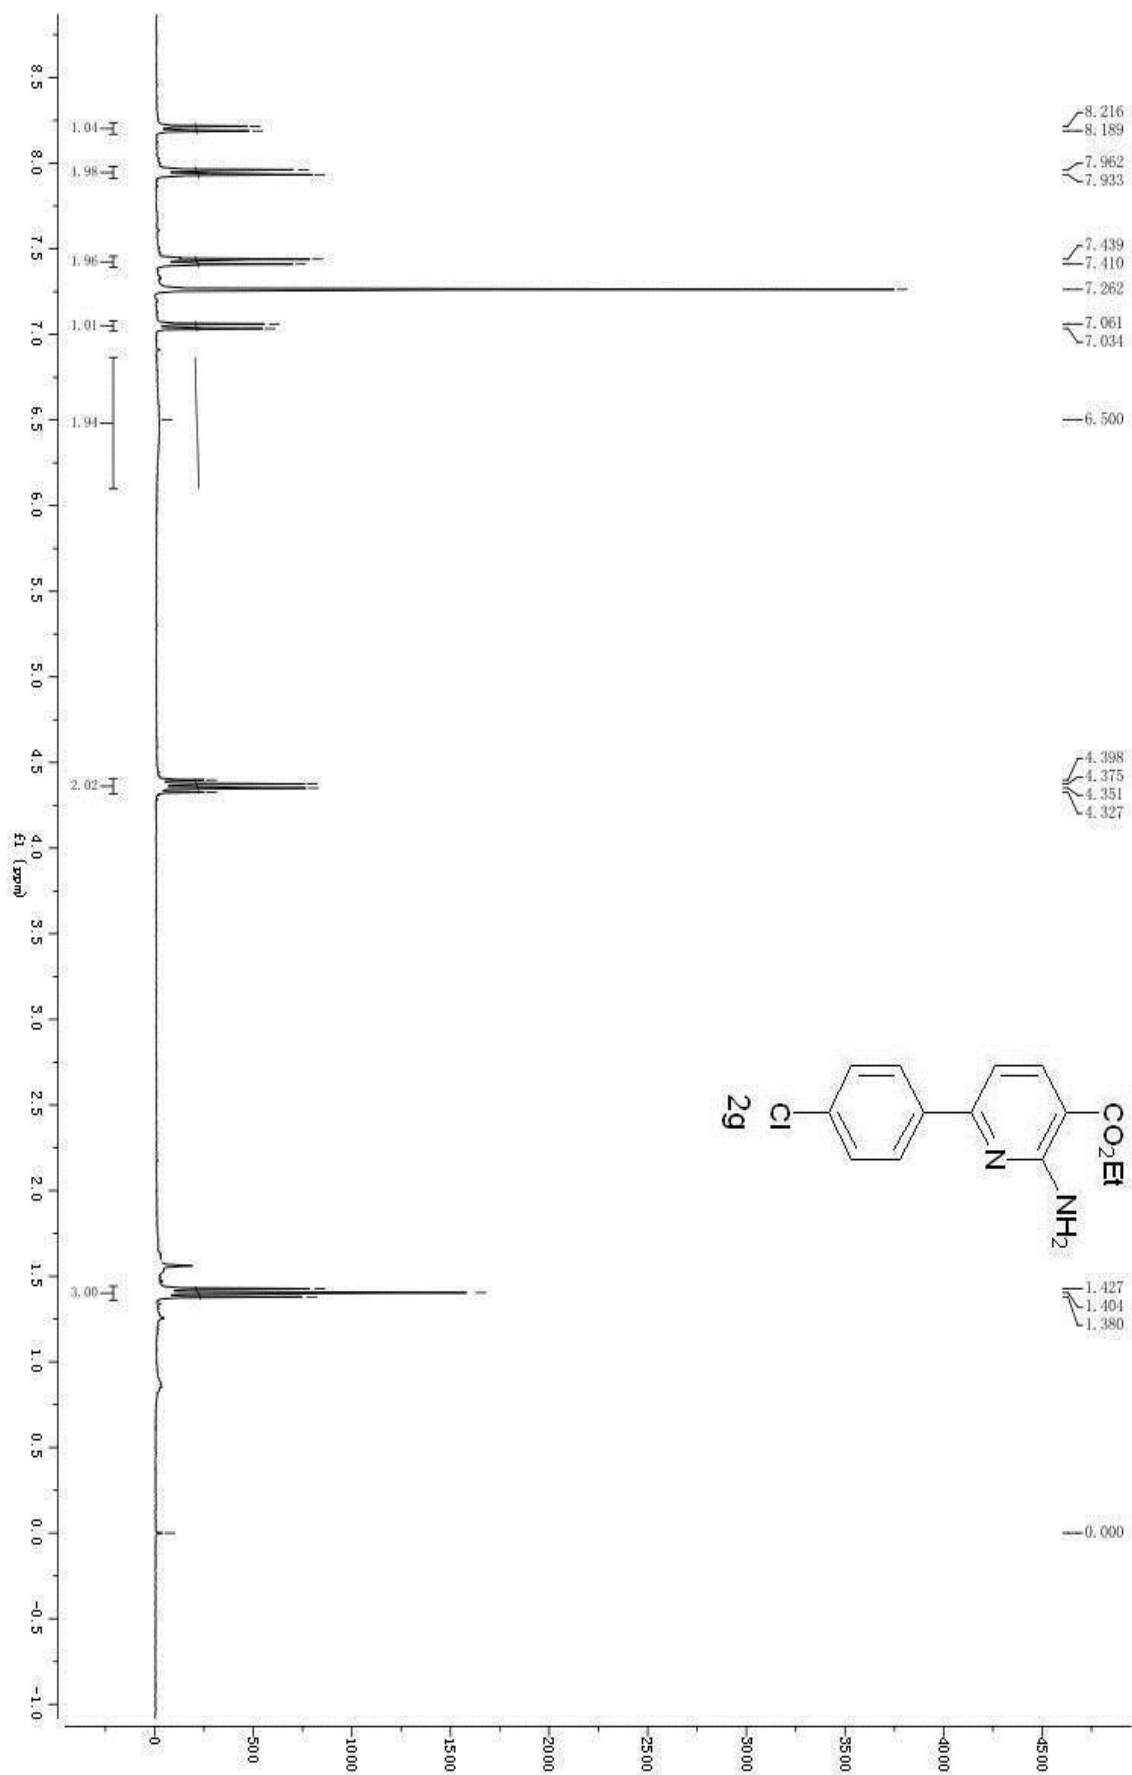

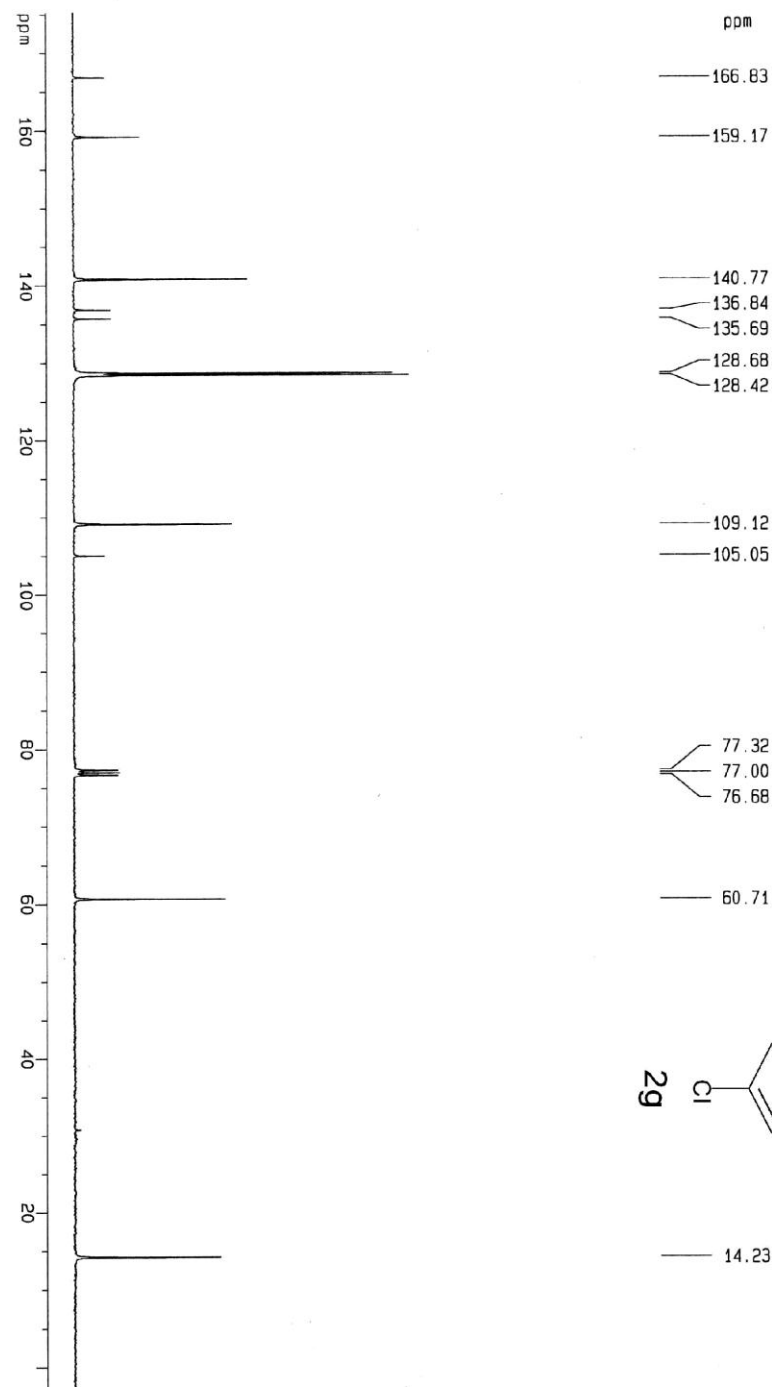

xxxx6

Current Data Parameters  
 NAME: XXXD  
 EXPNO: 5  
 PROCNO: 1

F2 - Acquisition Parameters  
 Date\_: 20101203  
 Time: 15.38  
 INSTRUM: AV400  
 PROBHD: 5 mm QNP 1H/13  
 PULPROG: zgpg  
 TD: 16384  
 SOLVENT: CDCl3  
 NS: 1062  
 DS: 0  
 SWH: 25062.656 Hz  
 FIDRES: 1.529703 Hz  
 AQ: 0.3269108 sec  
 RG: 8192  
 DW: 19.950 usec  
 DE: 6.00 usec  
 TE: 313.0 K  
 D1: 0.69999999 sec  
 d11: 0.03000000 sec

===== CHANNEL f1 =====  
 NUC1: 13C  
 P1: 2.80 usec  
 PL1: -3.00 dB  
 SFO1: 100.5785894 MHz

===== CHANNEL f2 =====  
 CPDPRG2: waltz16  
 NUC2: 1H  
 P2: 80.00 usec  
 PL2: -2.00 dB  
 PL12: 18.50 dB  
 SFO2: 399.9519998 MHz

F2 - Processing parameters  
 SI: 65536  
 SF: 100.5675179 MHz  
 KDN: EM  
 SSB: 0  
 LB: 4.00 Hz  
 GB: 0  
 PC: 1.00

1D NMR plot parameters  
 CX: 22.00 cm  
 CY: 6.00 cm  
 F1P: 179.304 ppm  
 F1: 17629.87 Hz  
 F2P: -2.875 ppm  
 F2: -289.18 Hz  
 PPMCM: 8.09906 ppm/cm  
 HZCM: 814.50226 Hz/cm

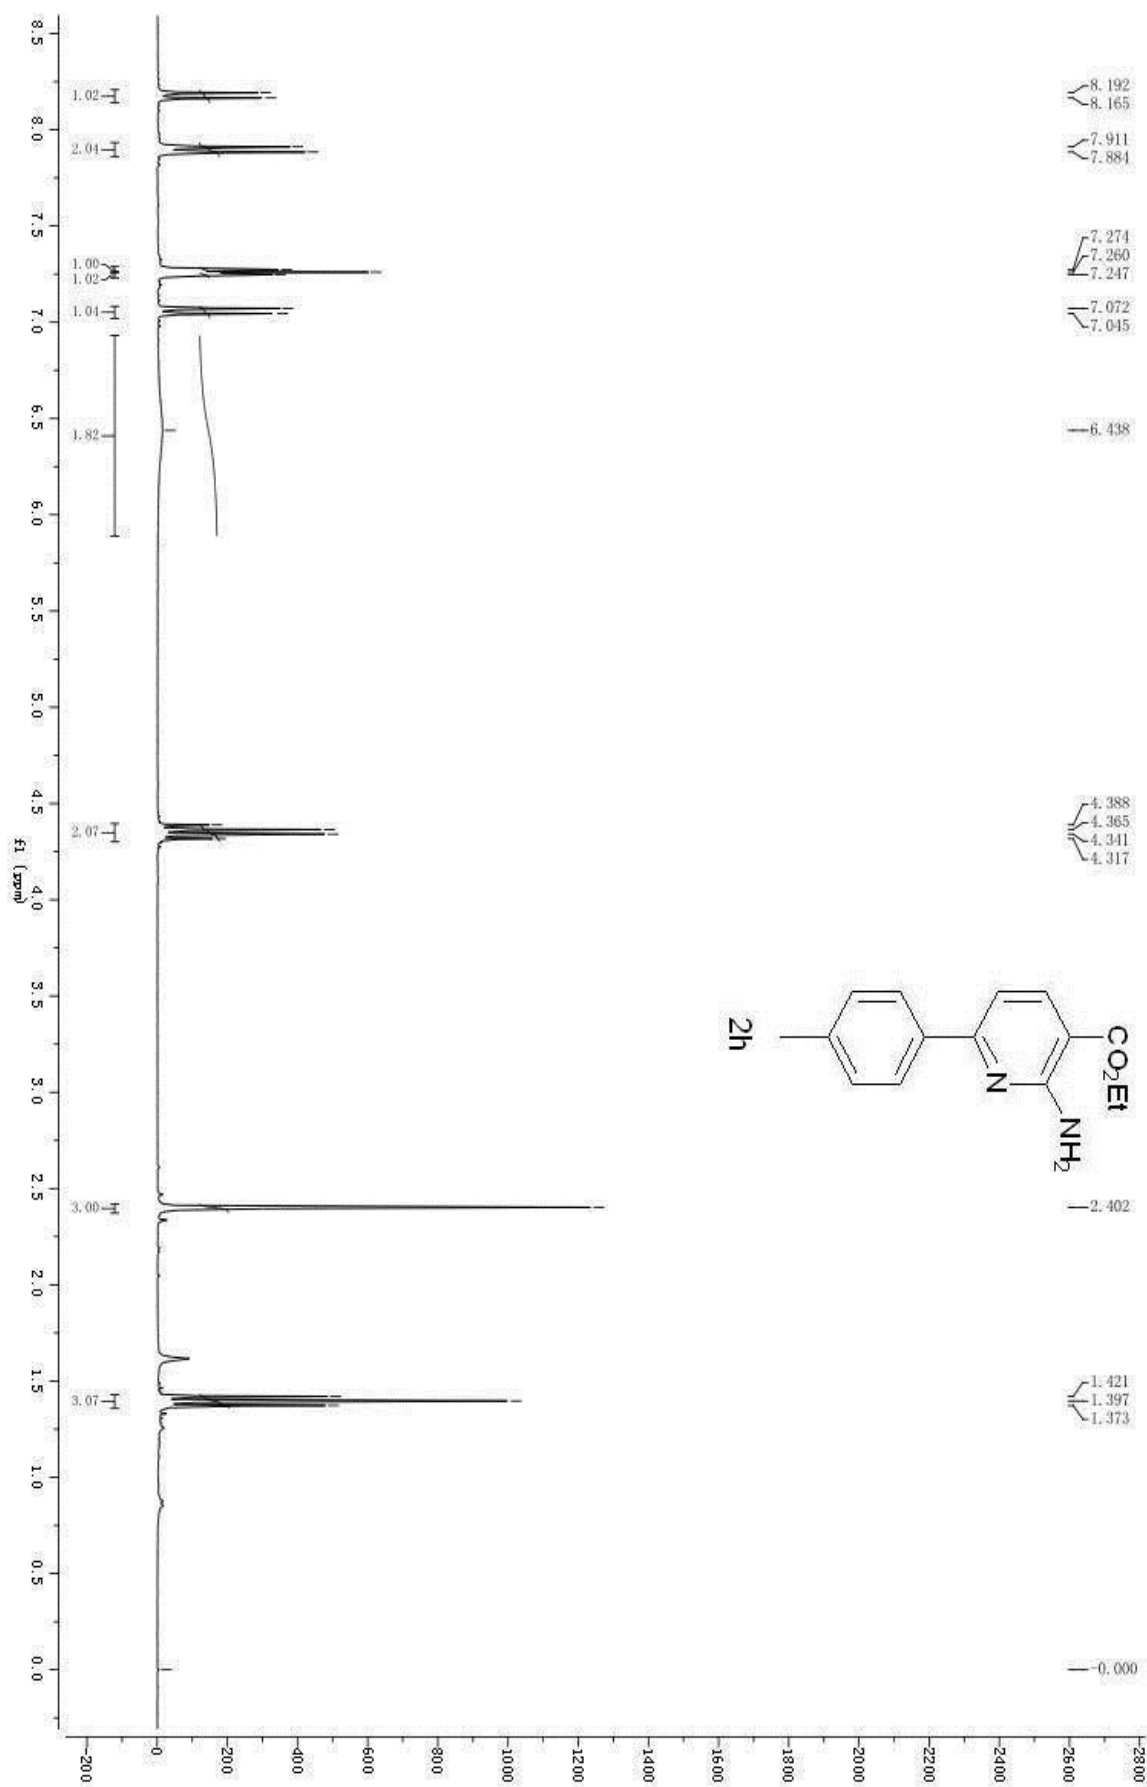



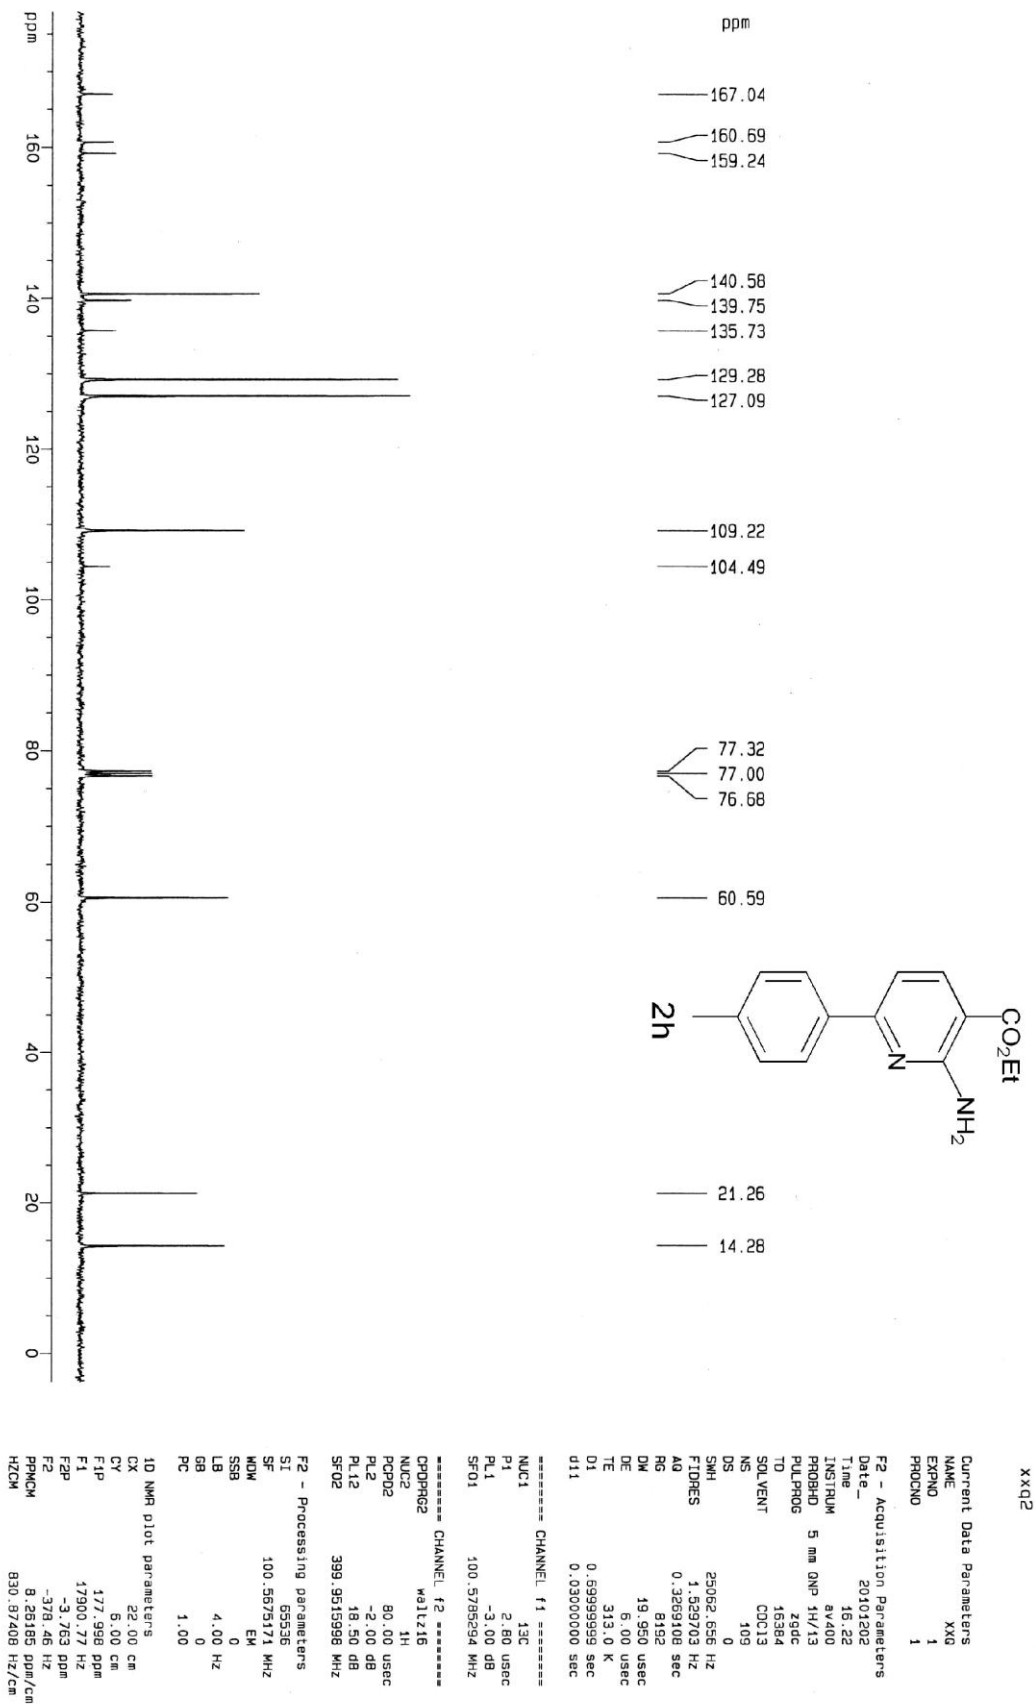

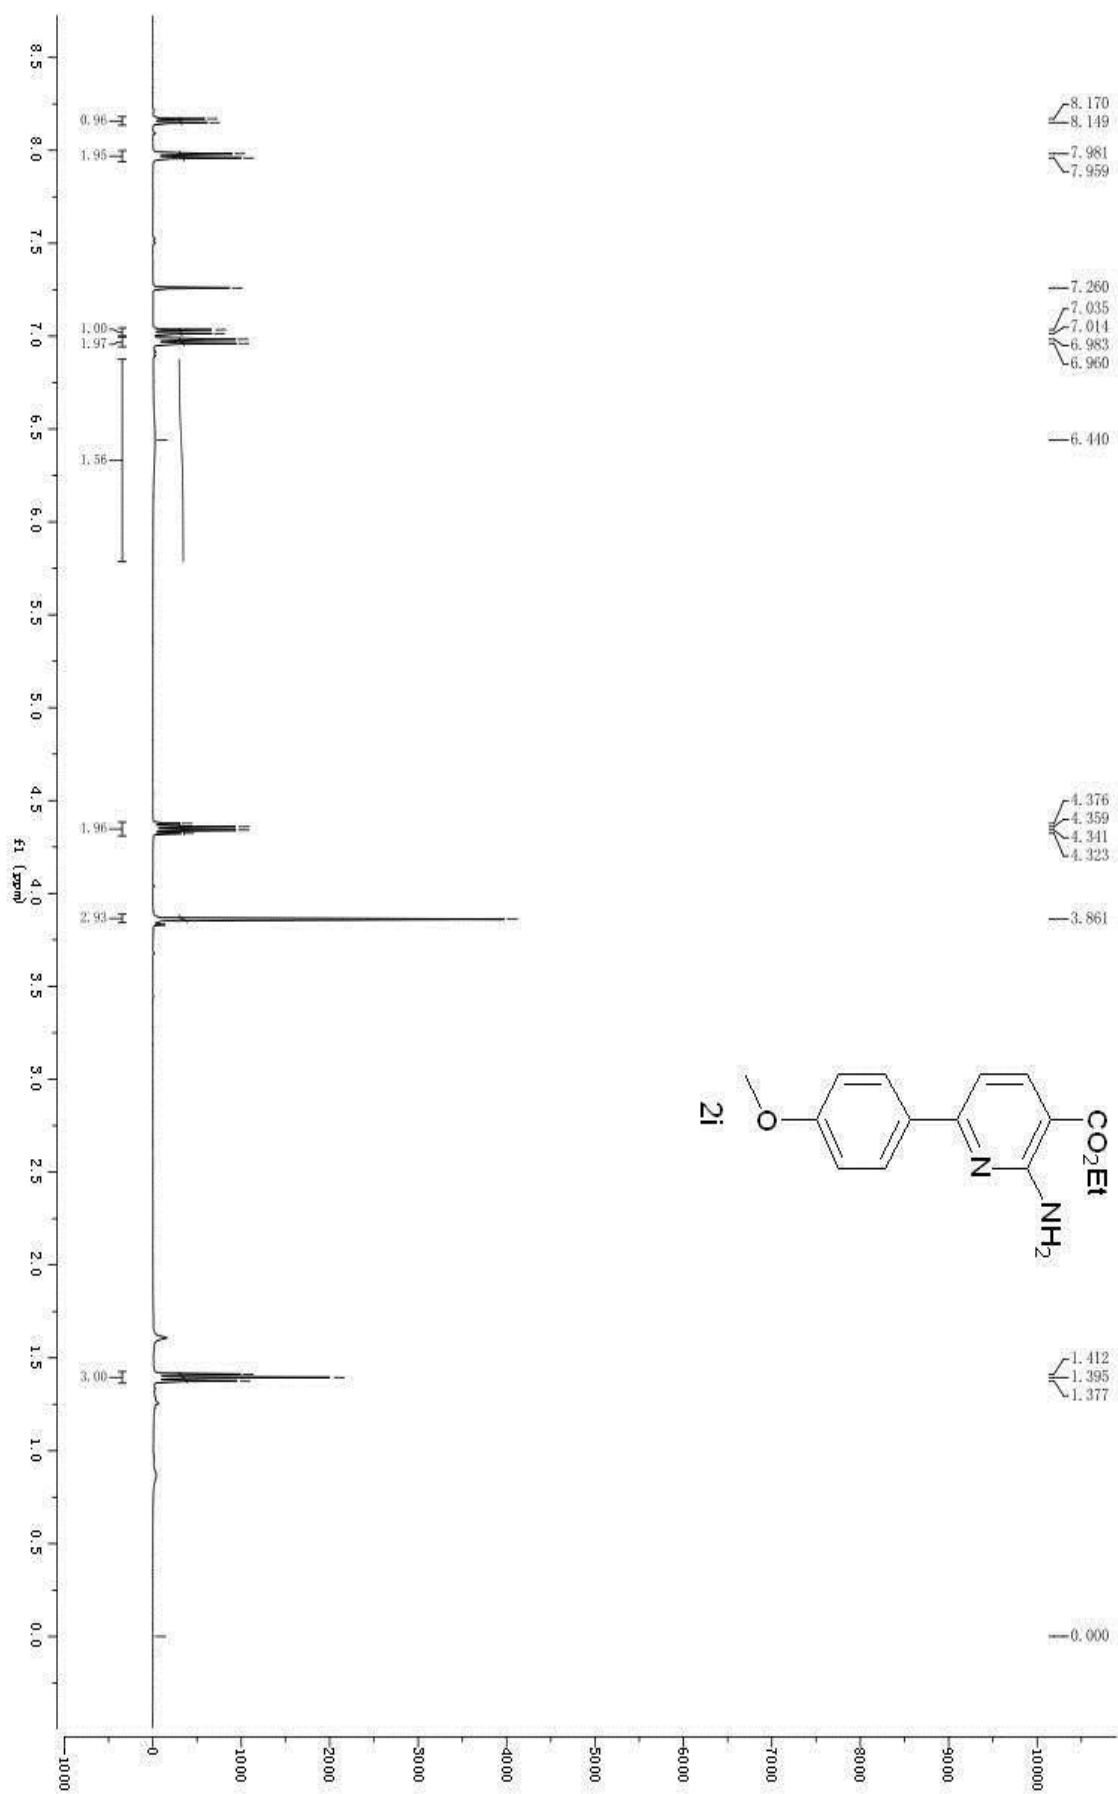

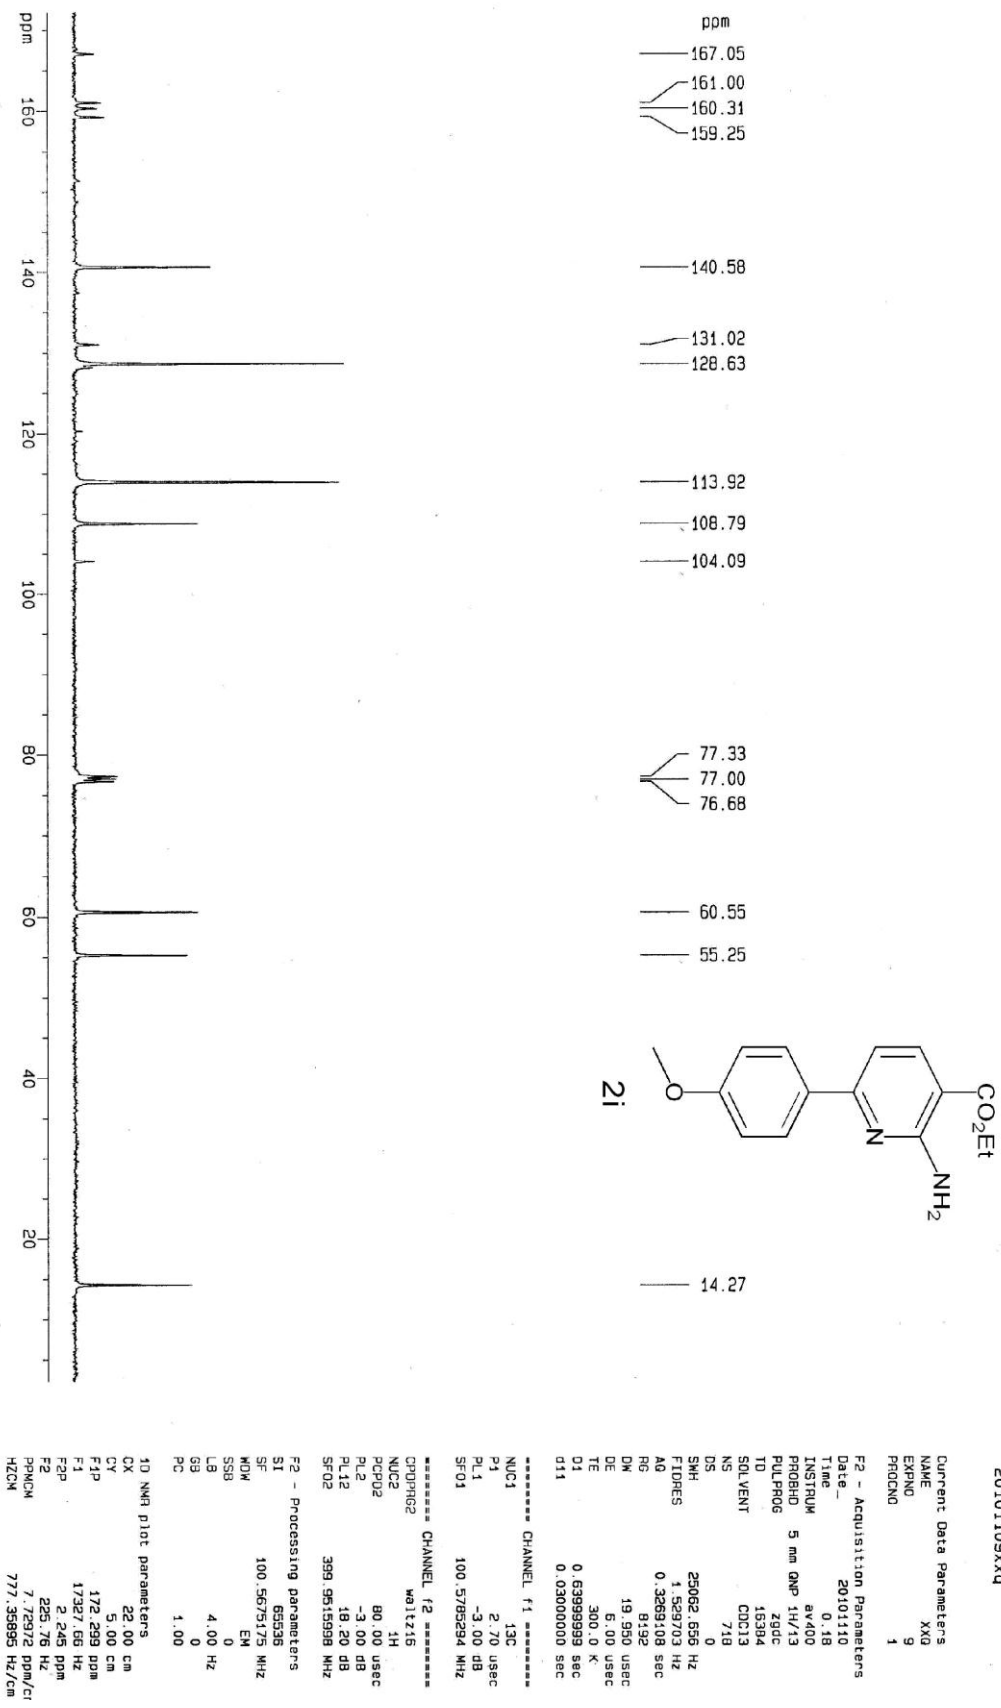

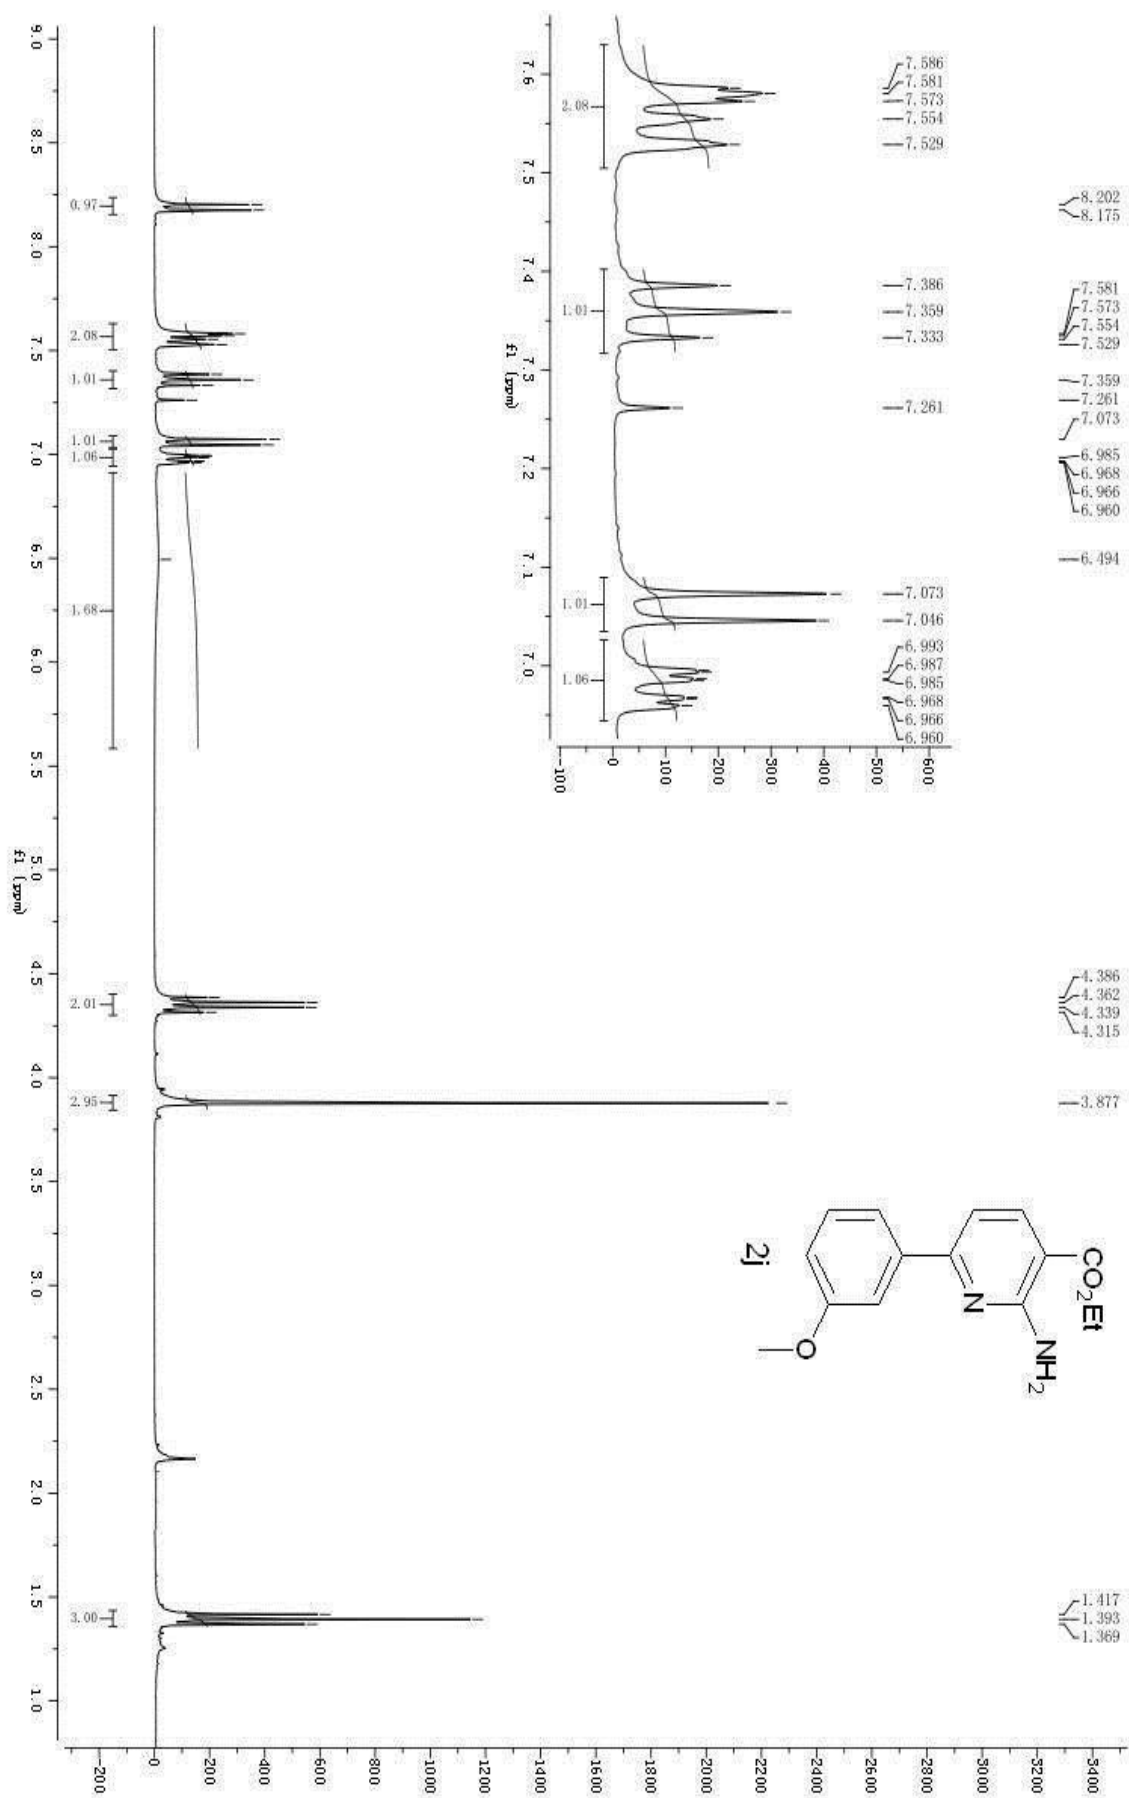

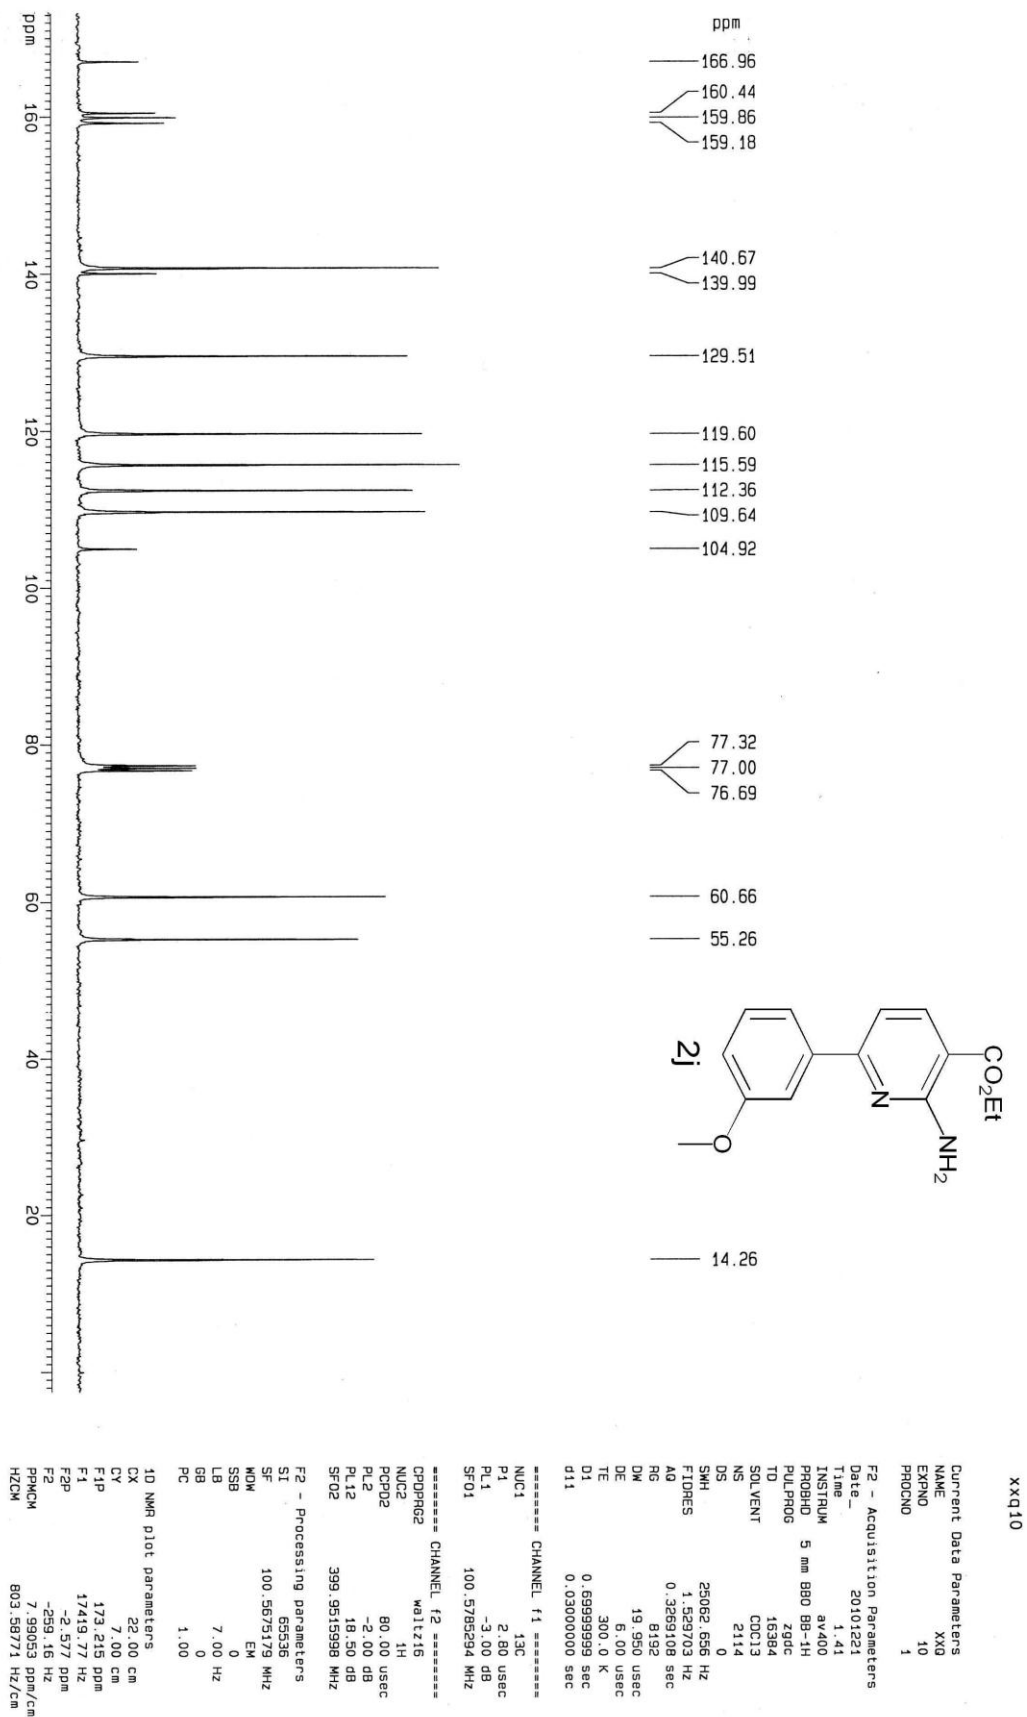

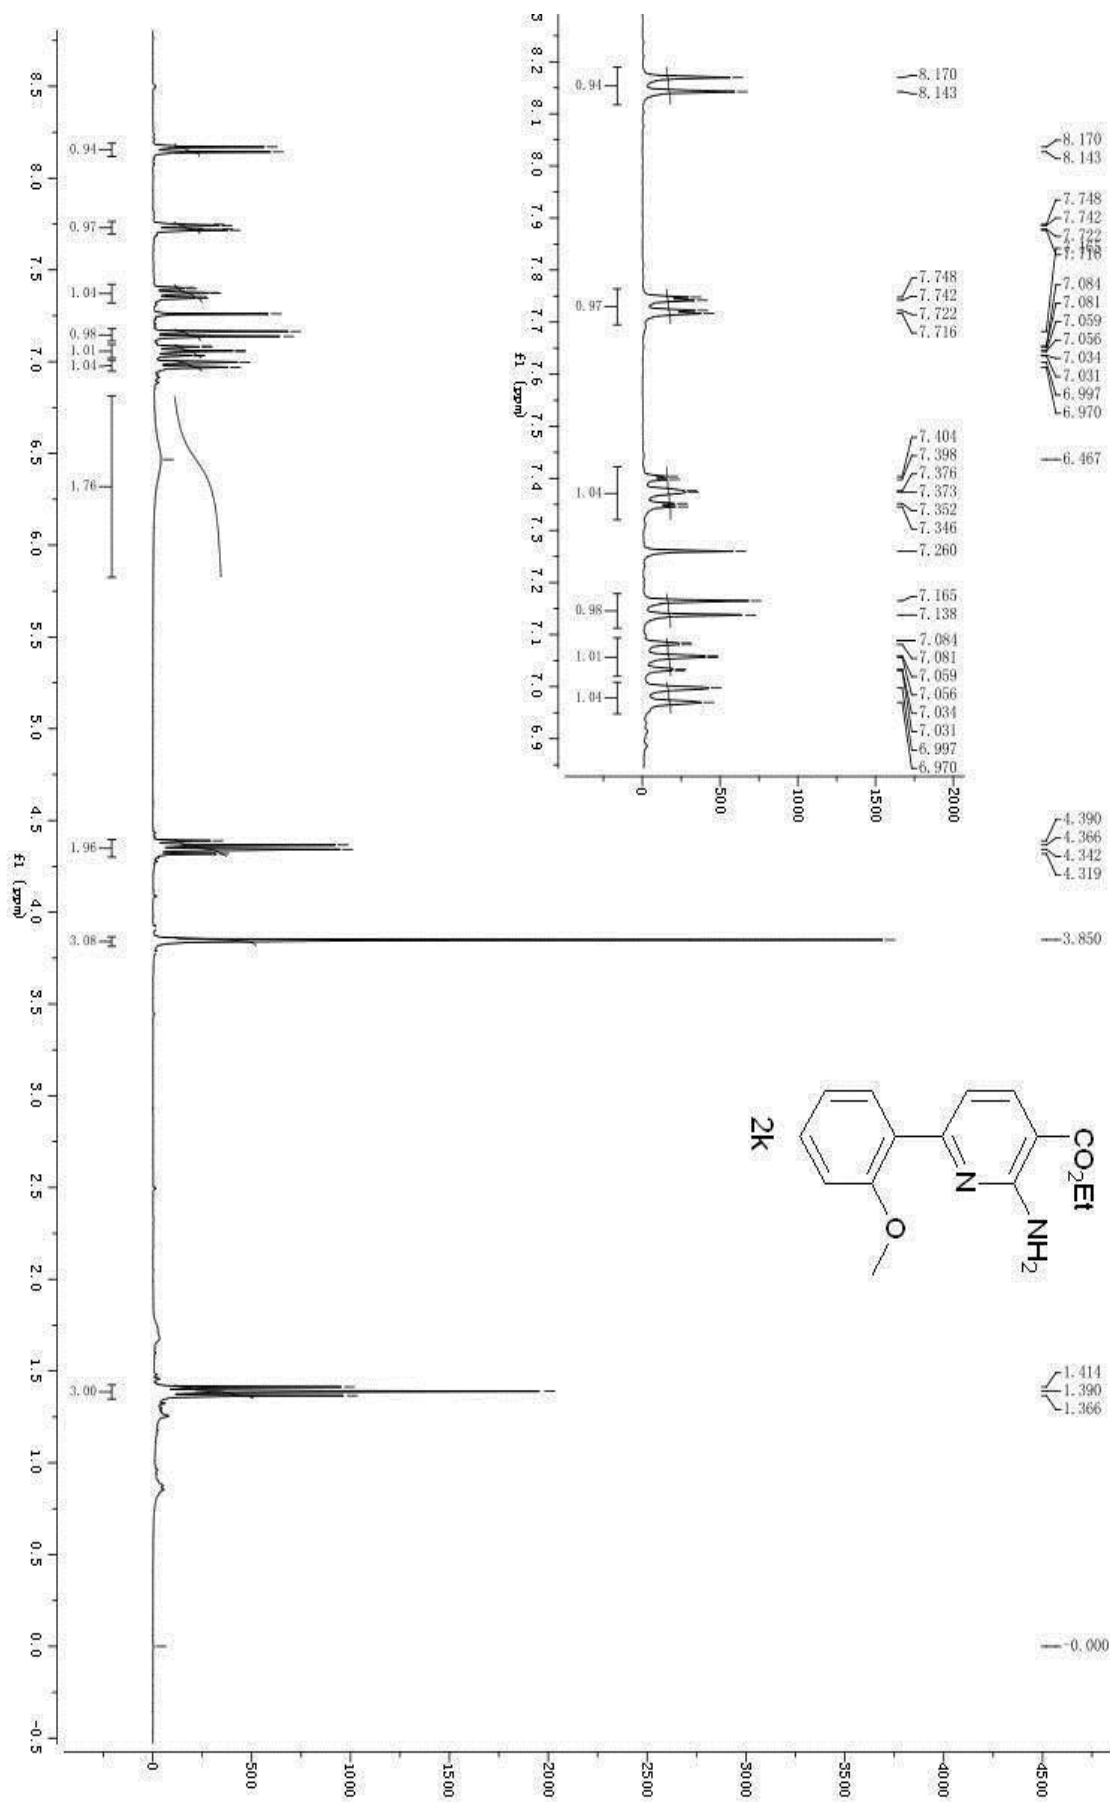

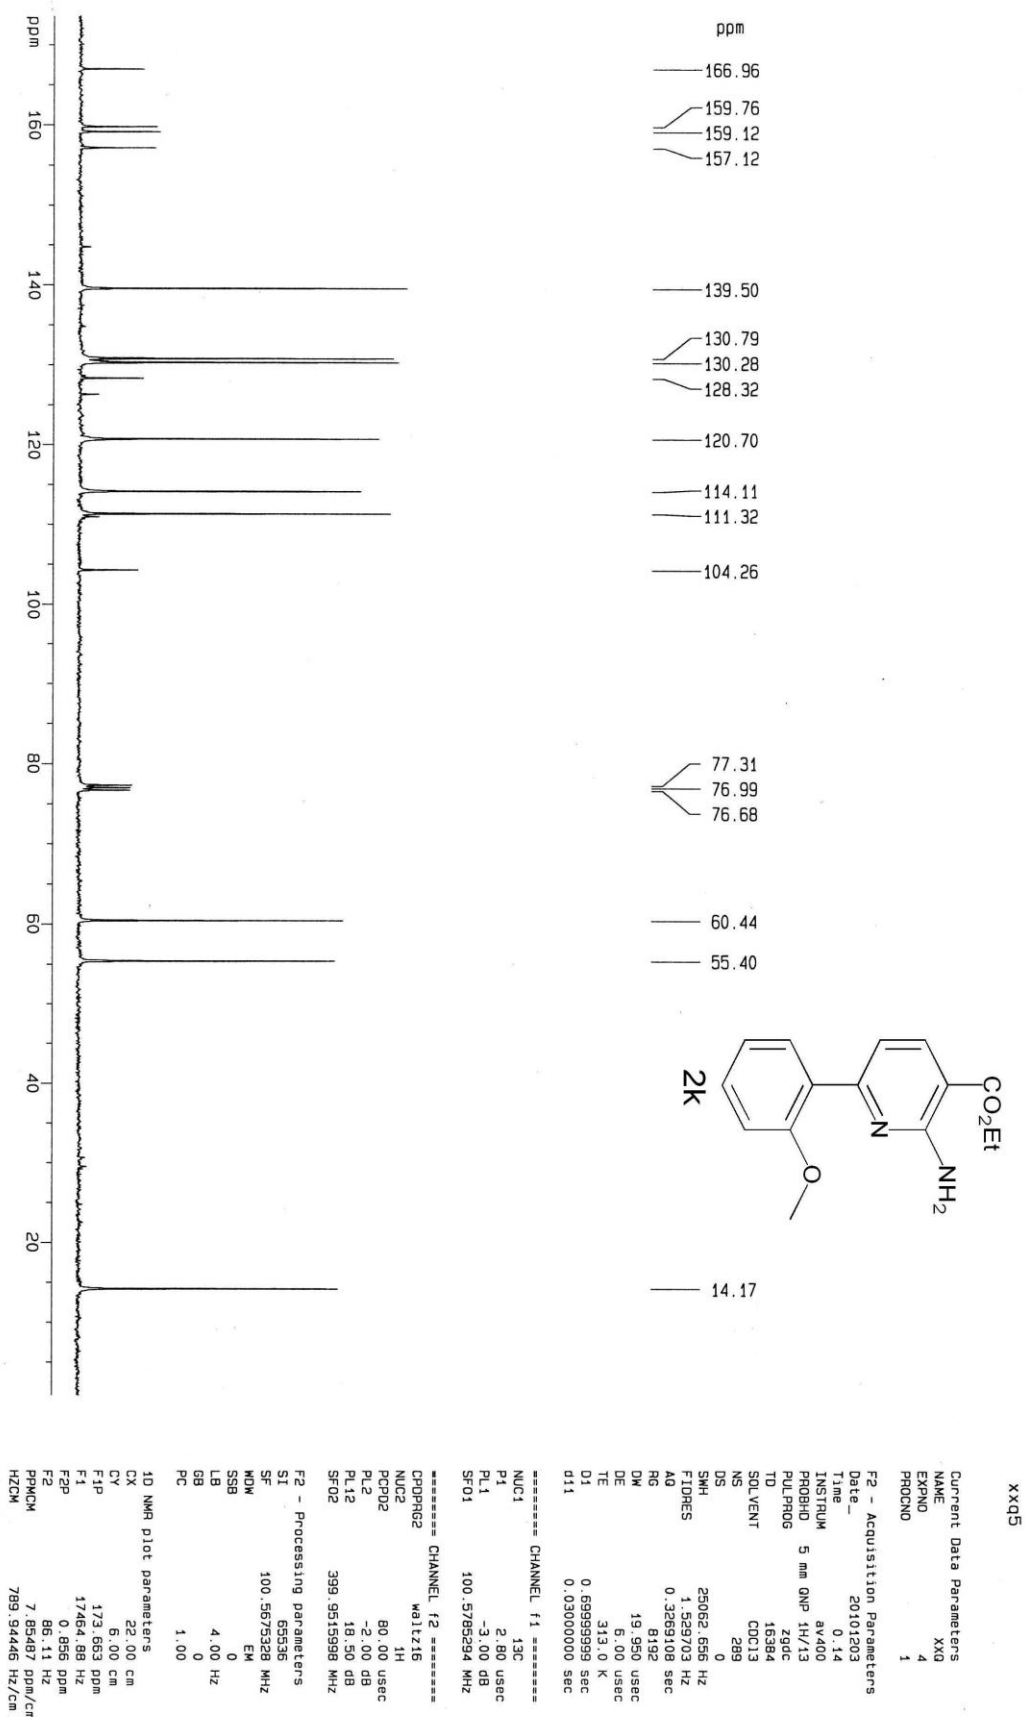

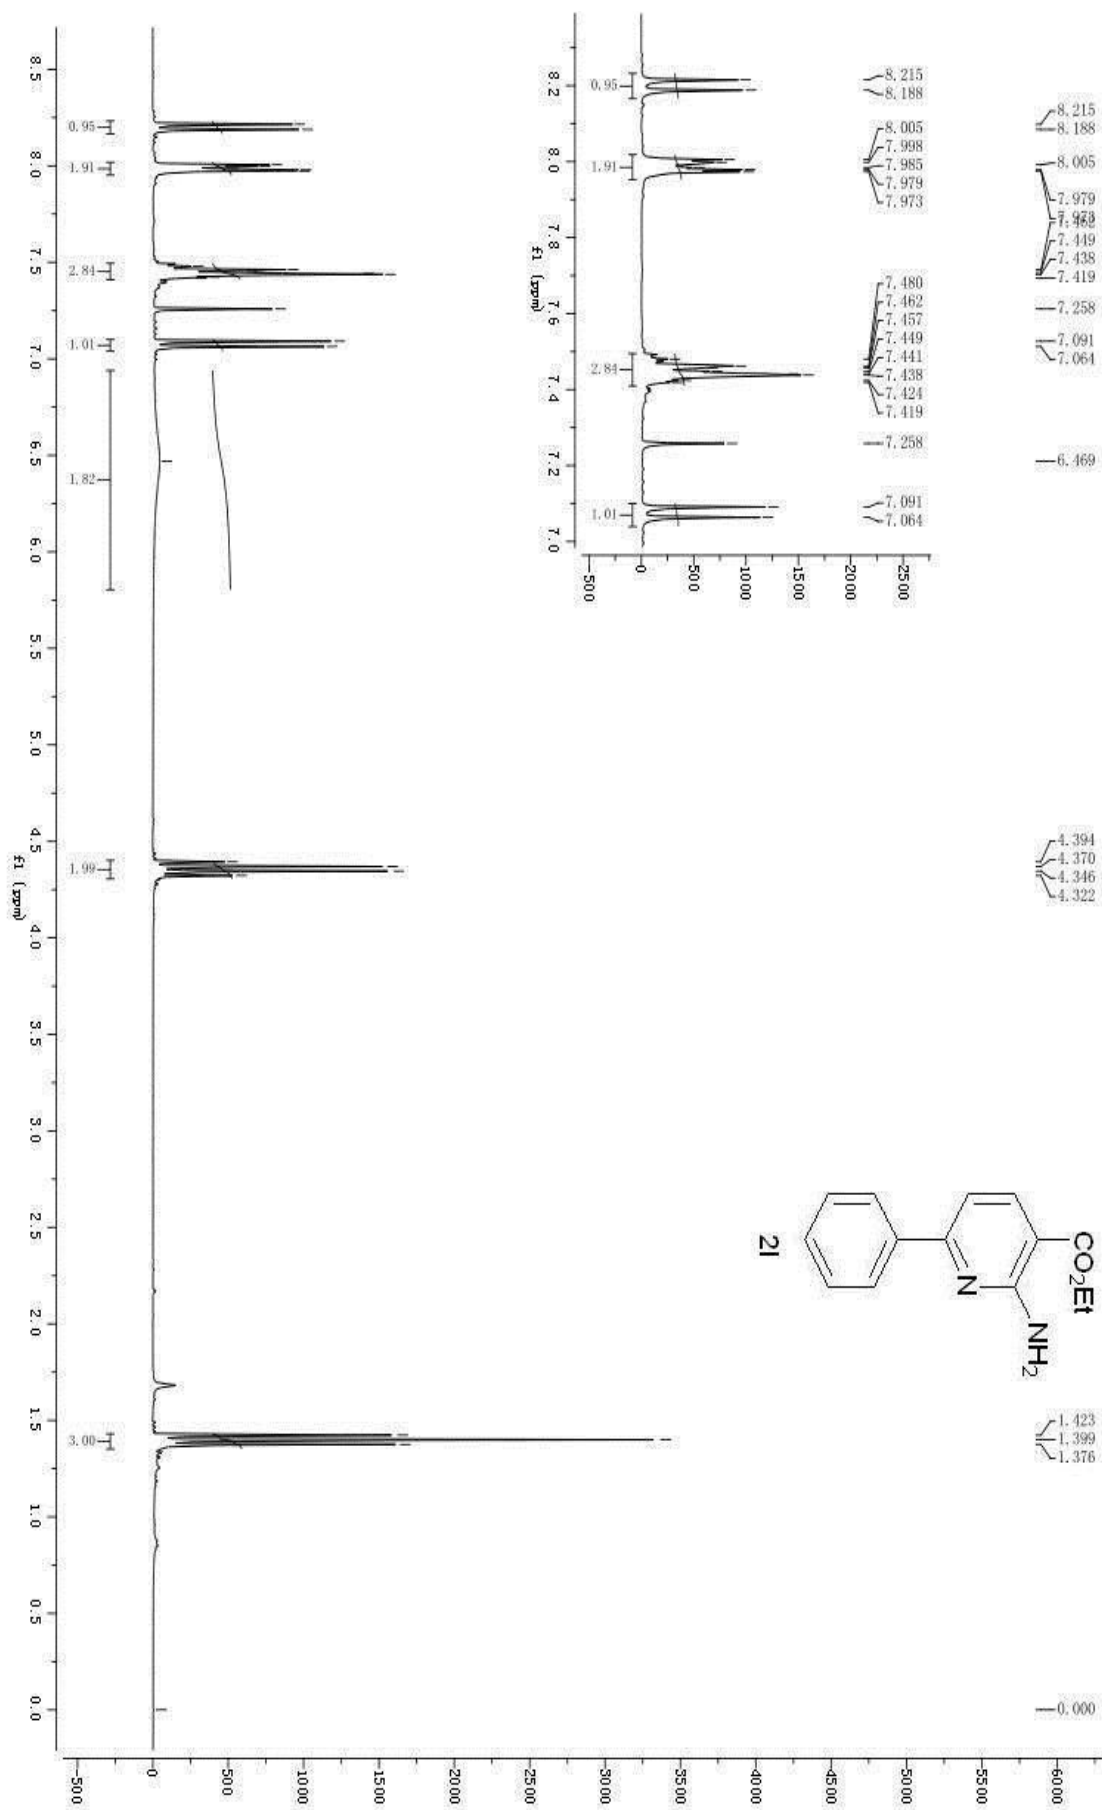



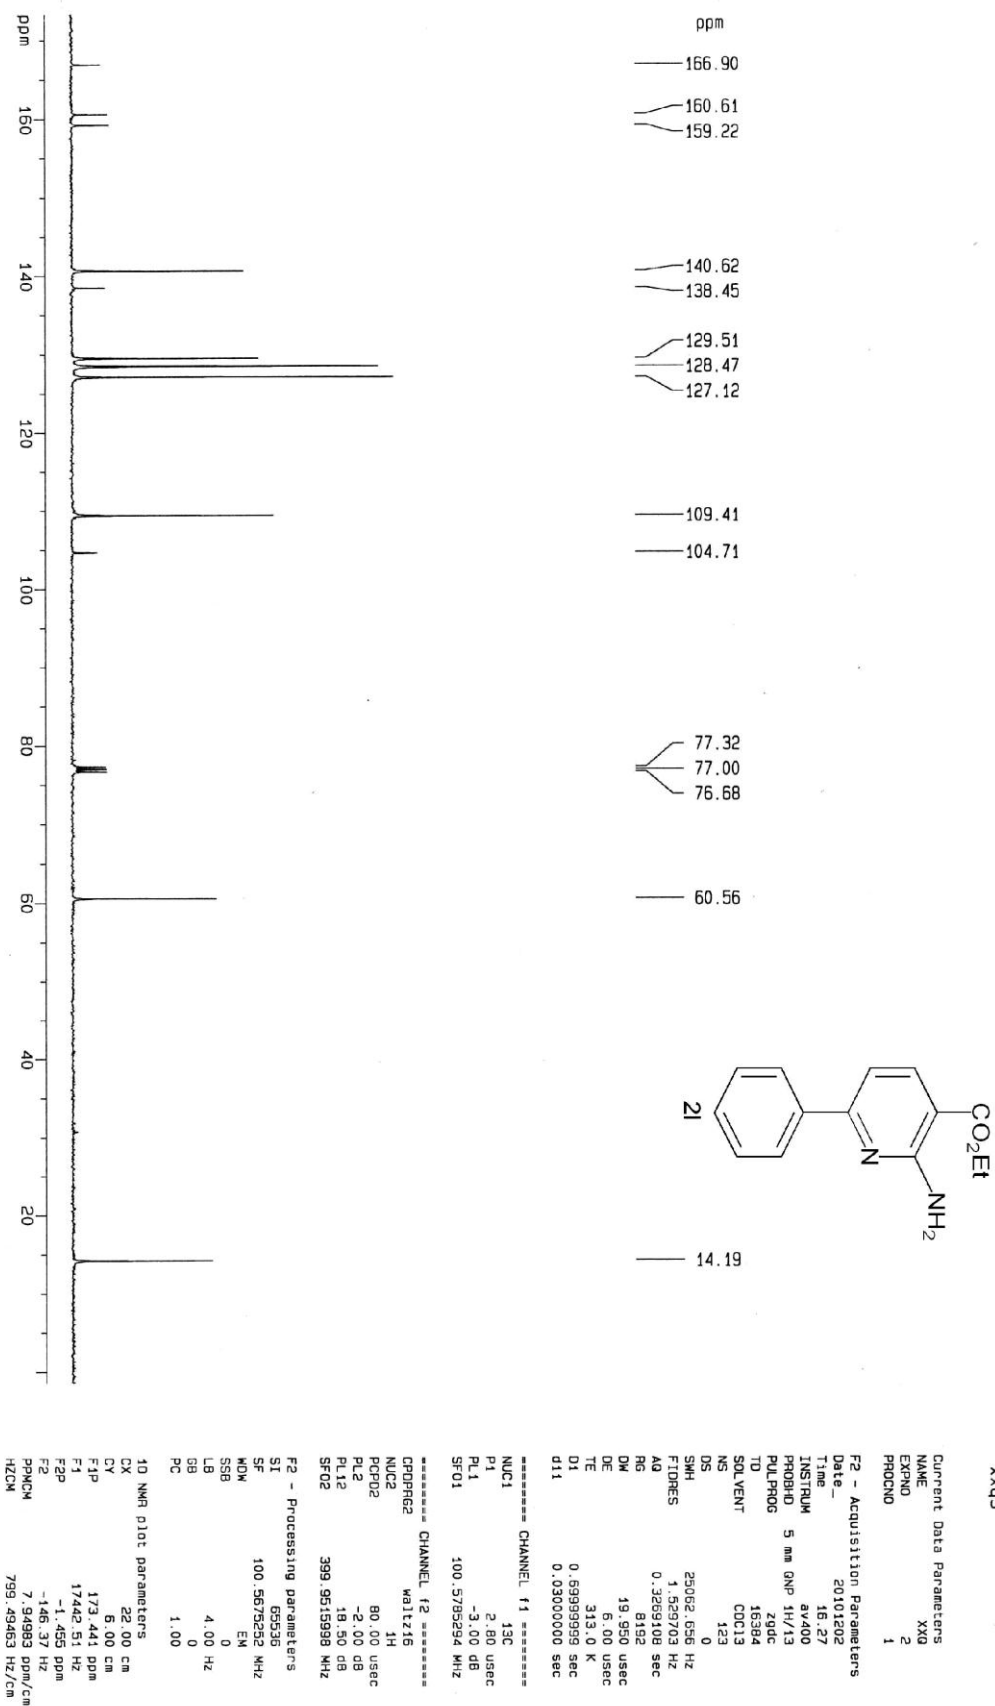

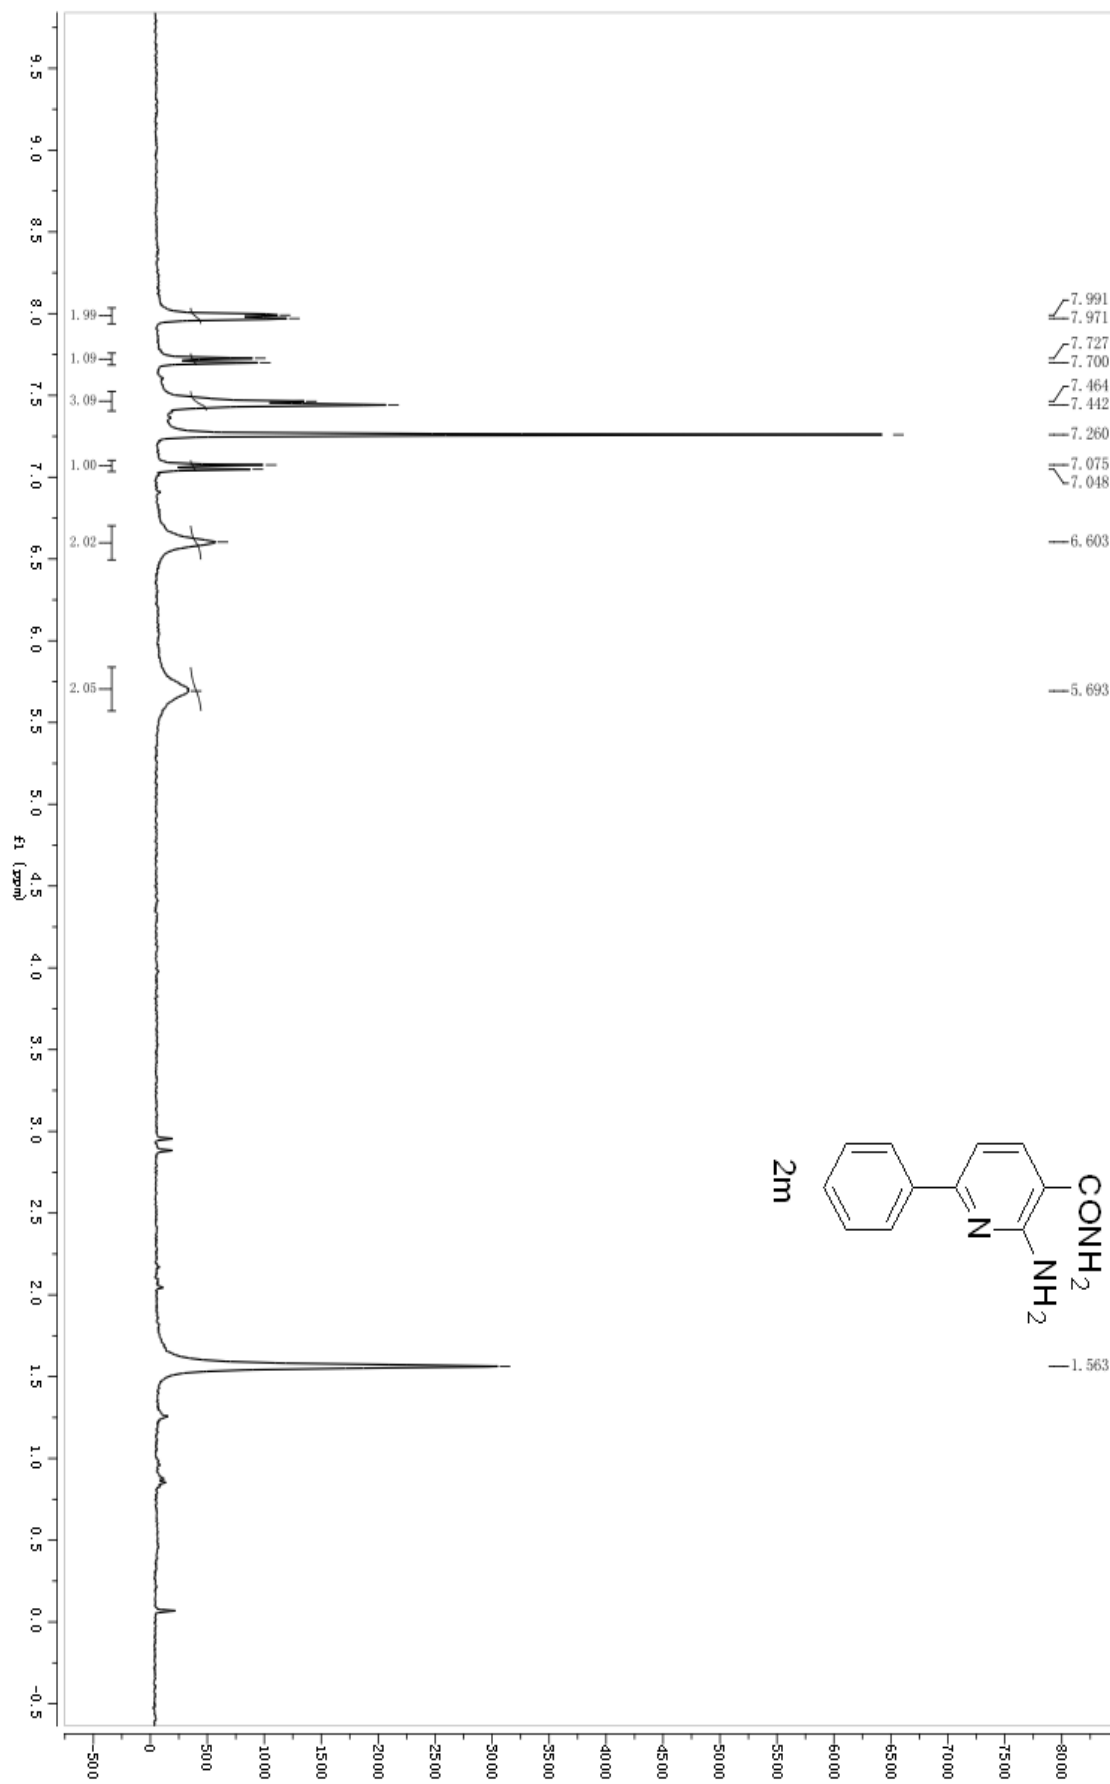

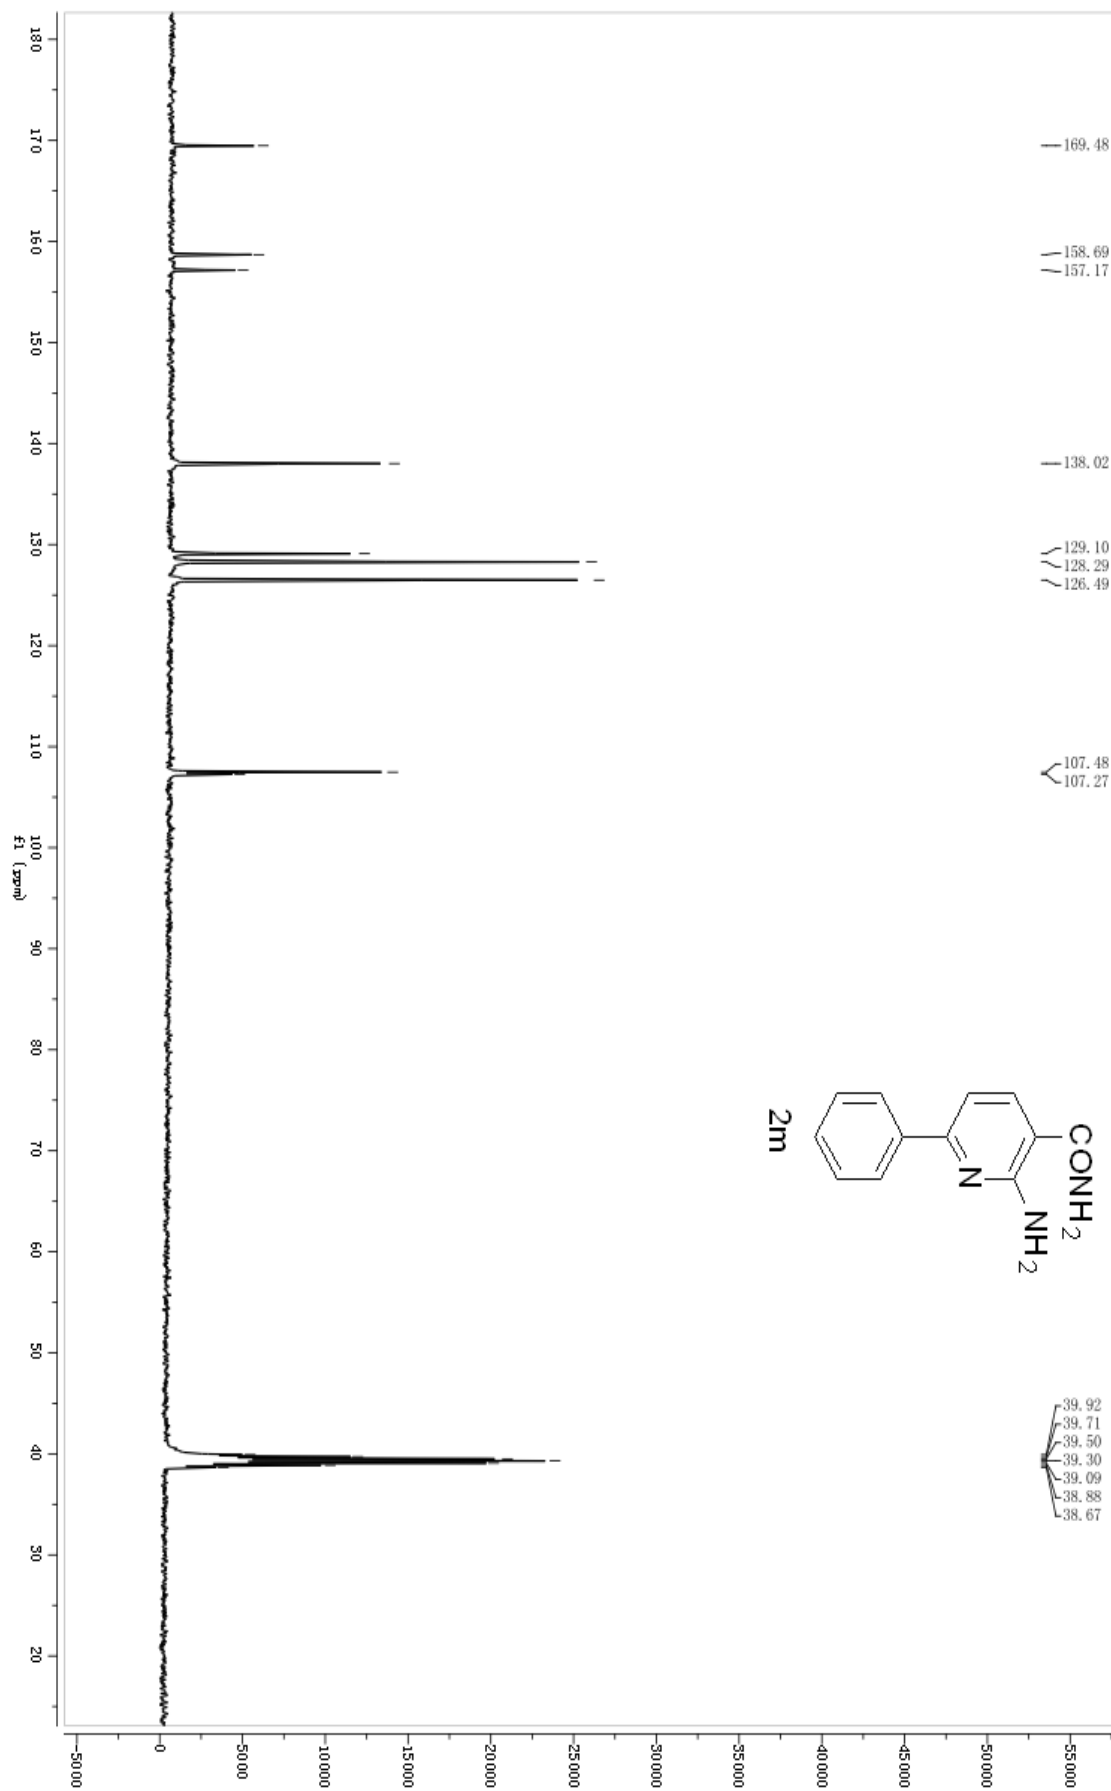

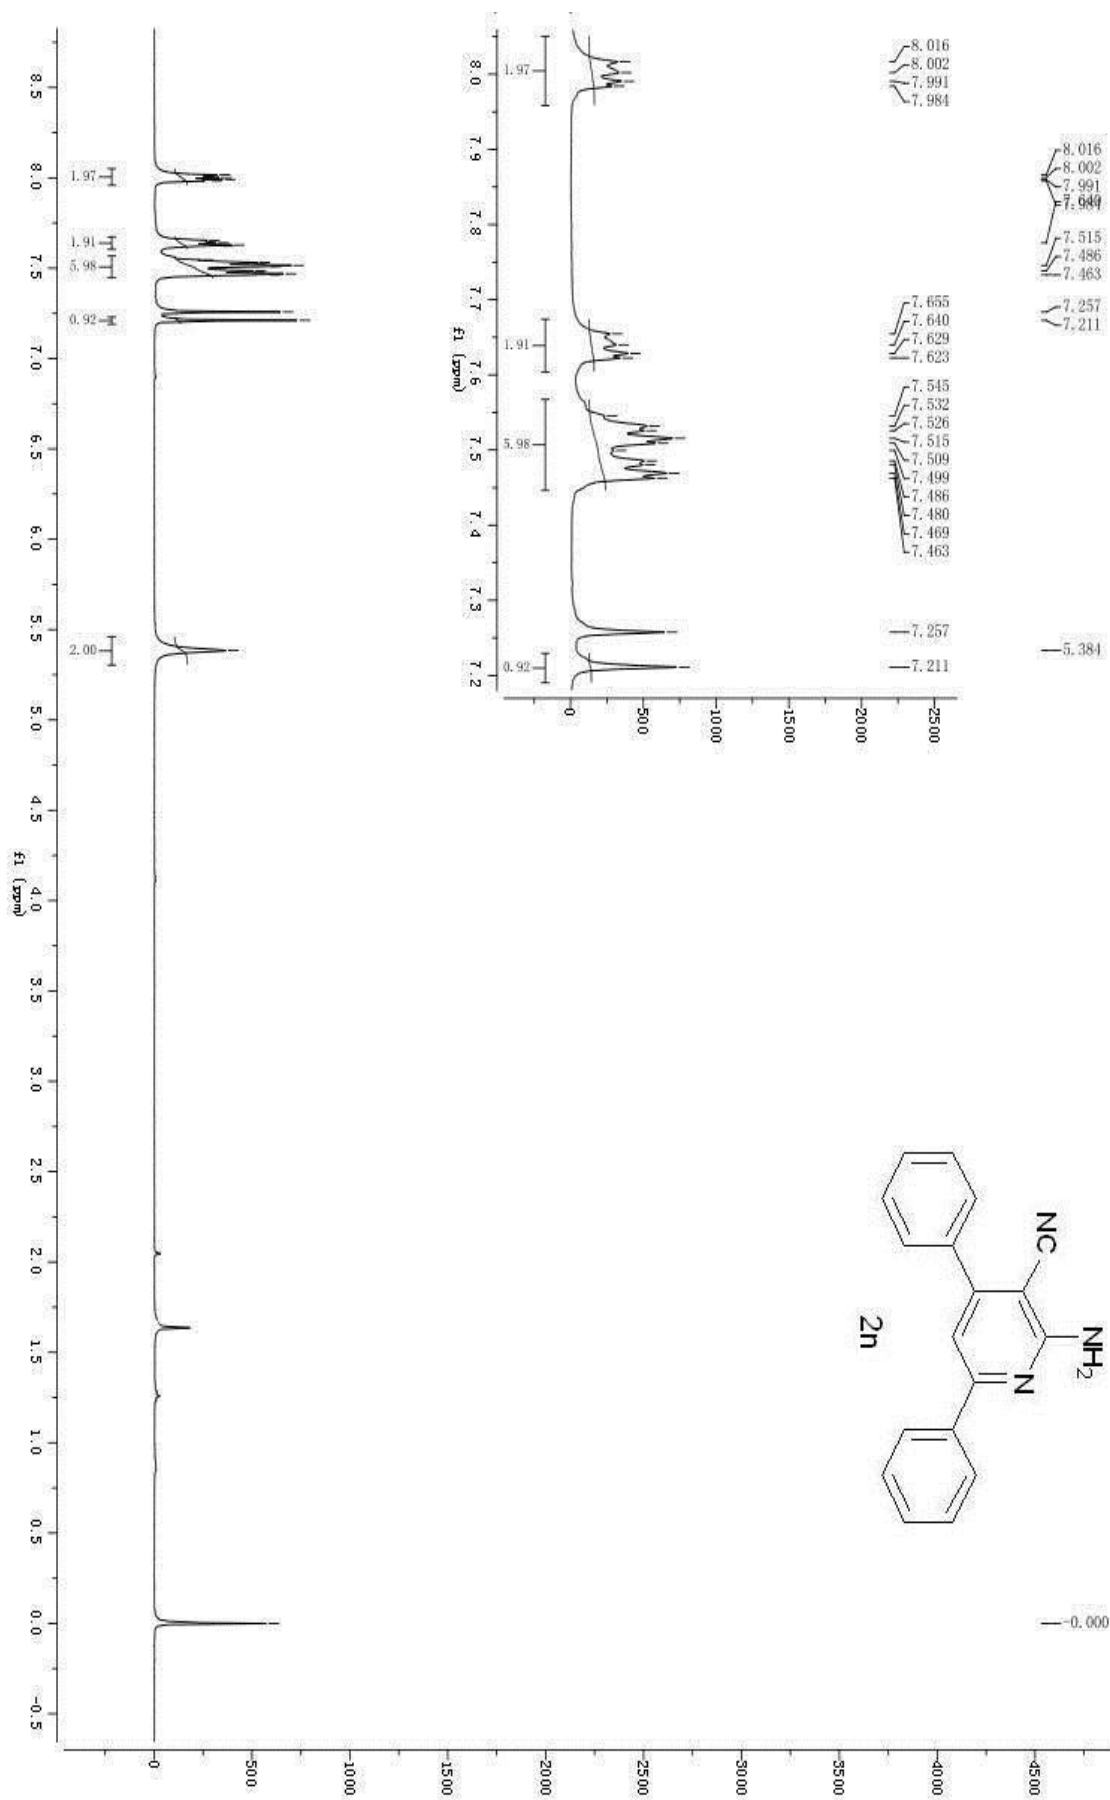

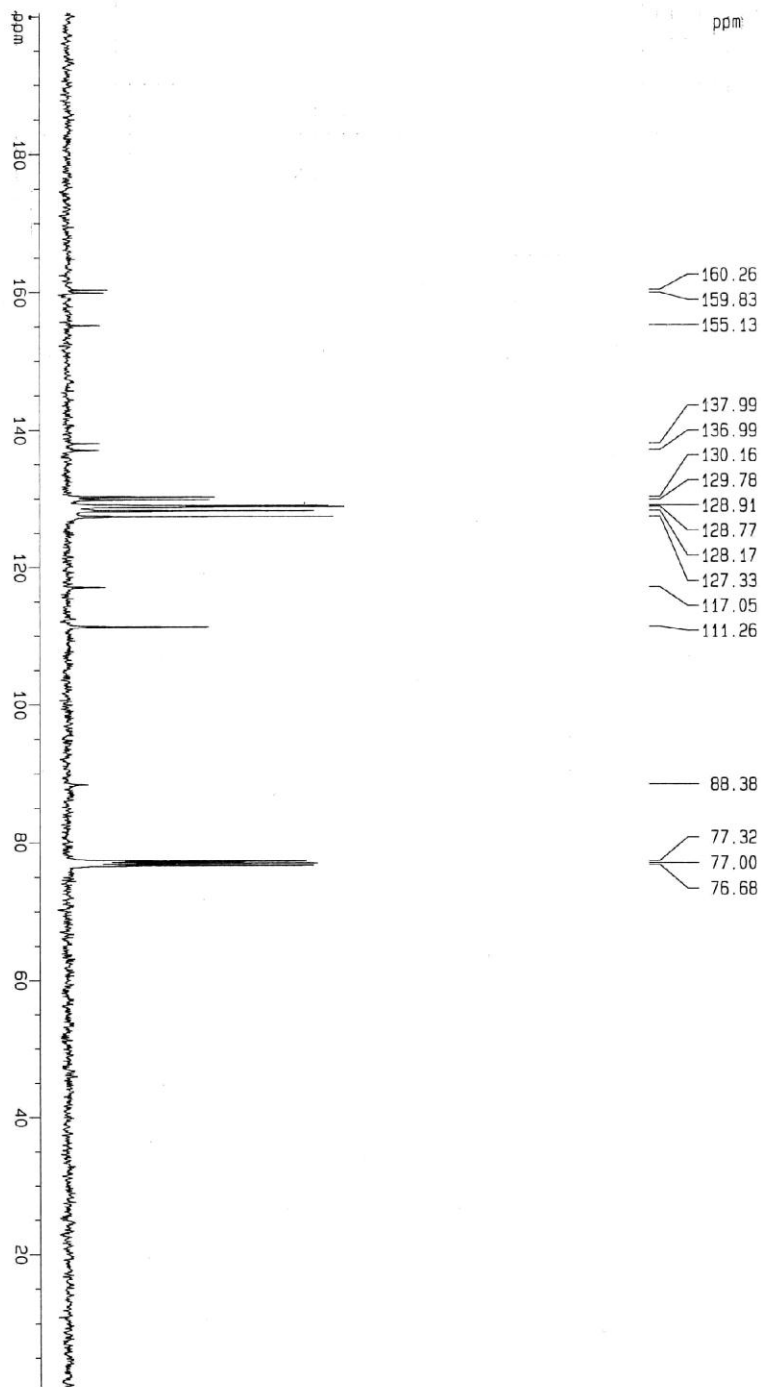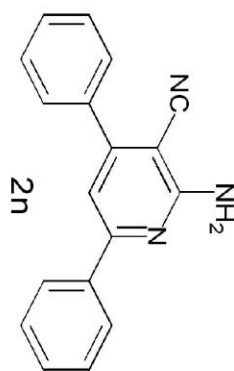

XXQ1-15

Current Data Parameters

|        |     |
|--------|-----|
| NAME   | XXQ |
| EXPNO  | 1   |
| PROCNO | 1   |

F2 - Acquisition Parameters

|         |                |
|---------|----------------|
| Date_   | 20110116       |
| Time    | 14.48          |
| INSTRUM | AV400          |
| PROBHD  | 5 mm QNP 1H/13 |
| PULPROG | zgpg           |
| TD      | 16384          |
| SOLVENT | CDCl3          |
| NS      | 628            |
| DS      | 0              |
| SWH     | 25062.656 Hz   |
| FTIDRES | 1.529703 Hz    |
| AD      | 0.3269108 sec  |
| RG      | 8192           |
| DM      | 19.950 usec    |
| DE      | 5.00 usec      |
| TE      | 303.0 K        |
| D1      | 0.69999999 sec |
| D11     | 0.03000000 sec |

===== CHANNEL f1 =====

|      |                 |
|------|-----------------|
| NUC1 | 13C             |
| P1   | 2.70 usec       |
| PL1  | -3.00 dB        |
| SFO1 | 100.5785294 MHz |

===== CHANNEL f2 =====

|         |                 |
|---------|-----------------|
| CPDPRG2 | WALTZ16         |
| NUC2    | 1H              |
| PCPD2   | 80.00 usec      |
| PL2     | -3.00 dB        |
| PL12    | 18.20 dB        |
| SFO2    | 399.9515999 MHz |

F2 - Processing parameters

|     |                 |
|-----|-----------------|
| SI  | 65536           |
| SF  | 100.5675087 MHz |
| WDW | EM              |
| SSB | 0               |
| LB  | 7.00 Hz         |
| GB  | 0               |
| PC  | 1.00            |

1D NMR plot parameters

|       |                 |
|-------|-----------------|
| CX    | 22.00 cm        |
| CY    | 5.00 cm         |
| F1P   | 200.619 ppm     |
| F2P   | 20.7572 Hz      |
| F2    | 0.797 ppm       |
| PPMCM | 9.08261 ppm/cm  |
| HZCM  | 913.43530 Hz/cm |

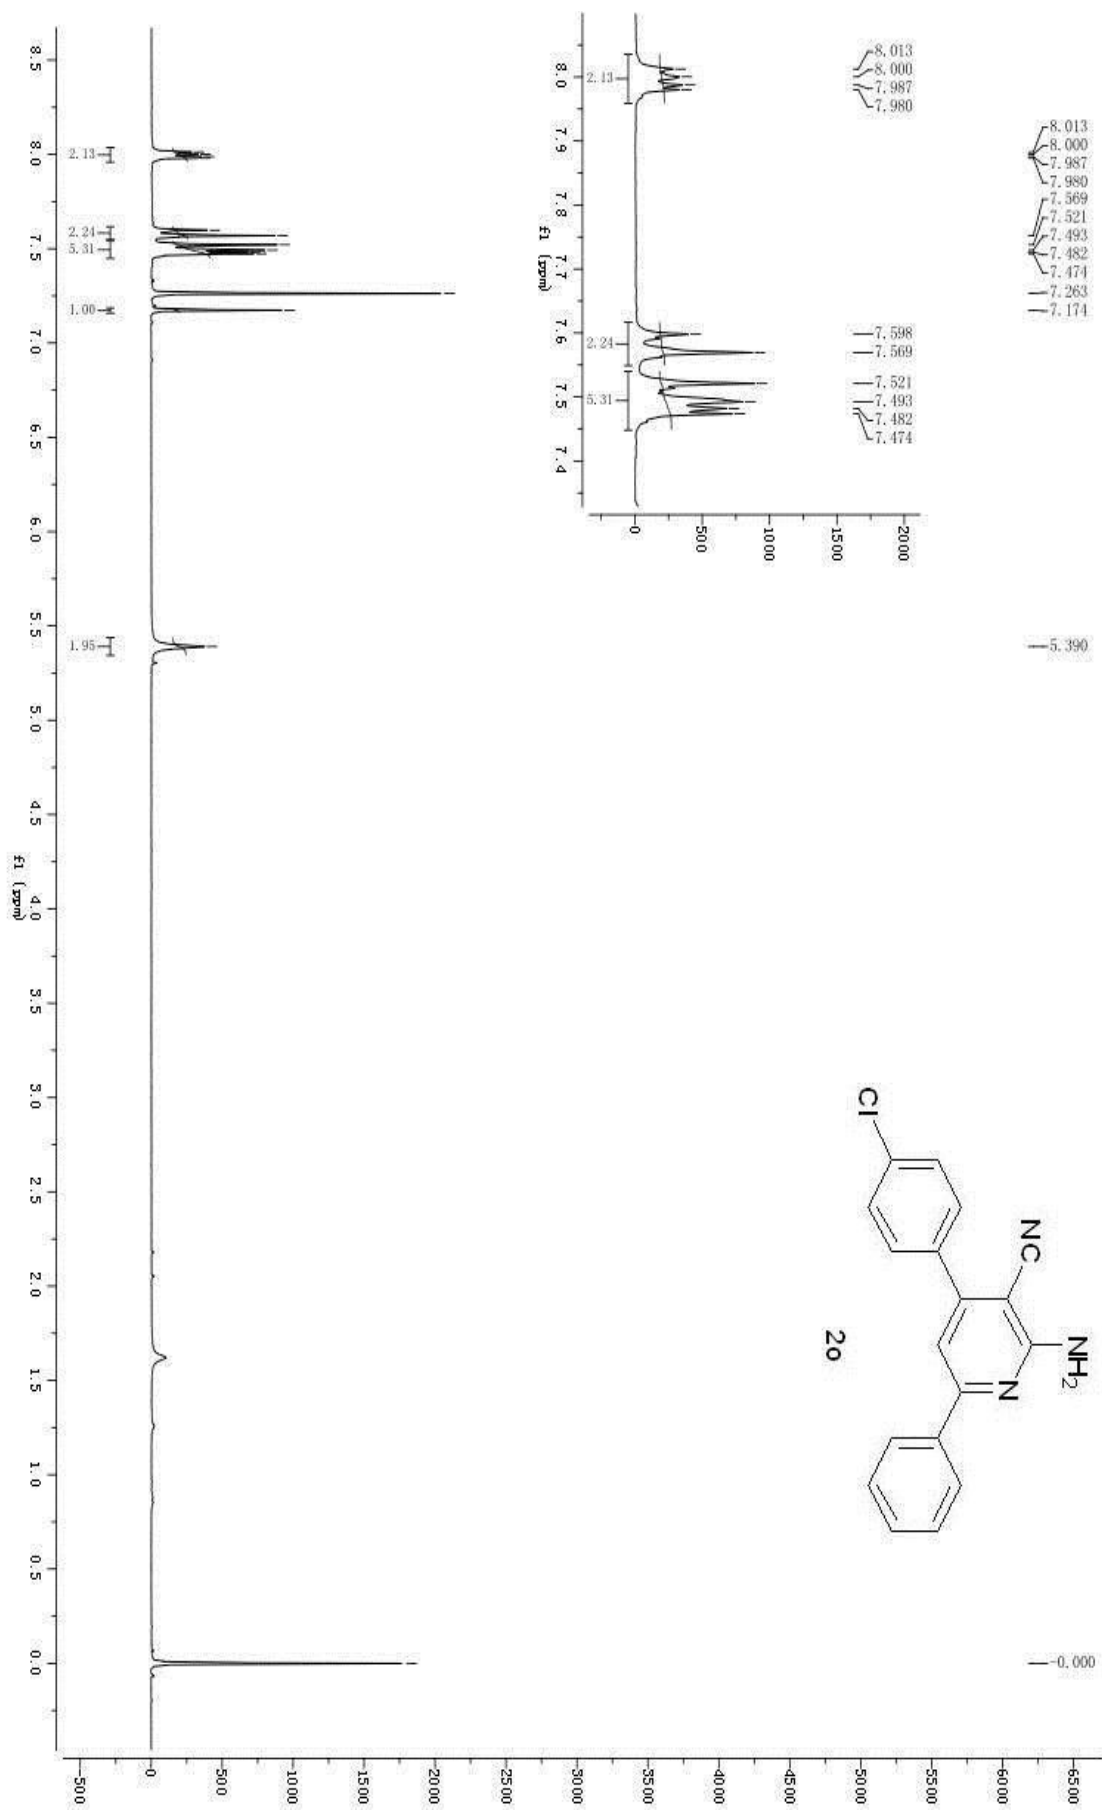

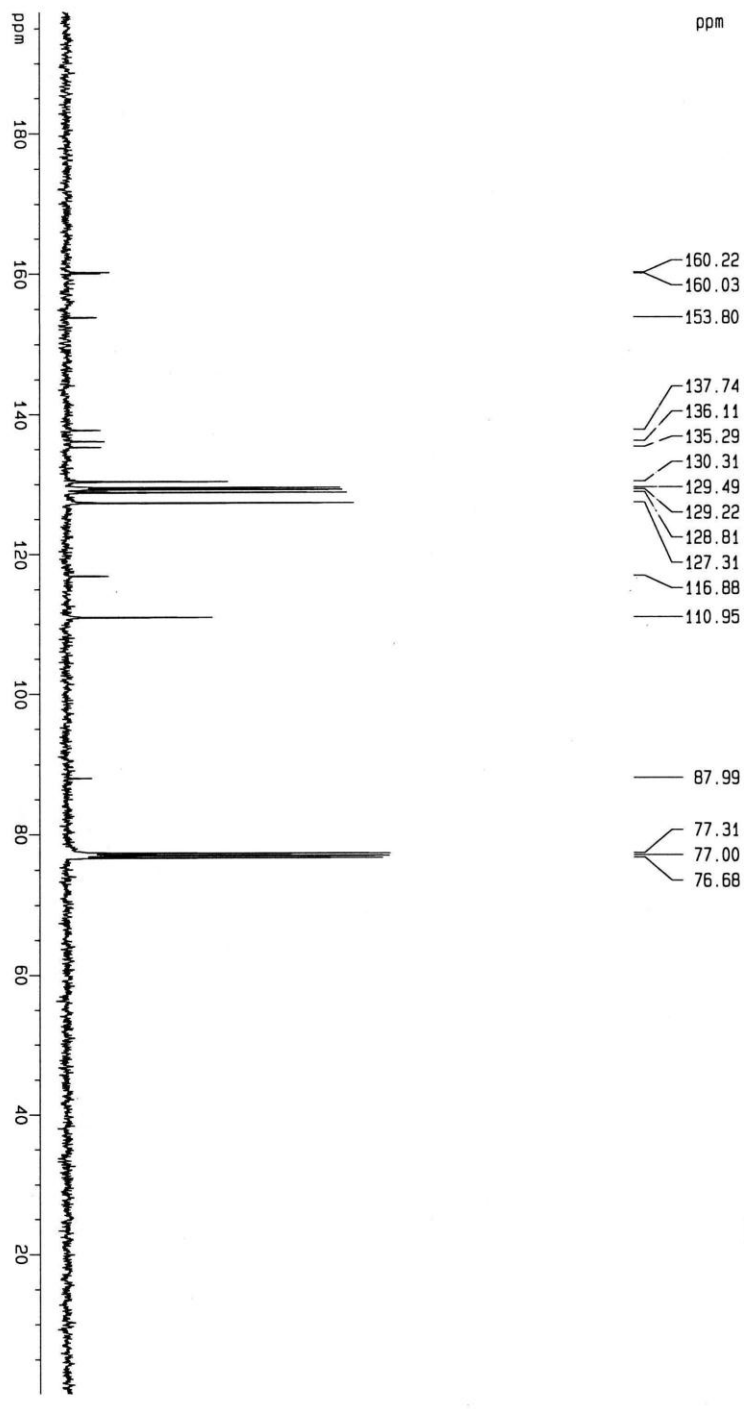

xxq1-19C

Current Data Parameters  
 NAME: XXQ  
 EXPNO: 3  
 PROCNO: 1

F2 - Acquisition Parameters

Date\_: 20110120  
 Time: 21:27  
 INSTRUM: av400  
 PROBR0: 5 mm QNP 1H/13  
 PULPROG: zgpg  
 TD: 16384  
 SOLVENT: CDCl3  
 NS: 463  
 DS: 0  
 SMH: 25062.656 Hz  
 FIDRES: 1.529703 Hz  
 AQ: 0.3269108 sec  
 RG: 8192  
 DM: 19.950 usec  
 DE: 6.00 usec  
 TE: 300.0 K  
 D1: 0.6999999 sec  
 d11: 0.0300000 sec

----- CHANNEL f1 -----  
 NUC1: 13C  
 P1: 2.70 usec  
 PL1: -3.00 dB  
 SF01: 100.5785294 MHz

----- CHANNEL f2 -----  
 CPDPRG2: waltz16  
 NUC2: 1H  
 PCPD2: 80.00 usec  
 PL2: -3.00 dB  
 PL12: 17.37 dB  
 SF02: 399.9515998 MHz

F2 - Processing parameters

SI: 65536  
 SF: 100.5675122 MHz  
 MDW: EM  
 SSB: 0  
 LB: 4.00 Hz  
 GB: 0  
 PC: 0.90

1D NMR plot parameters

CX: 22.00 cm  
 CY: 6.00 cm  
 F1P: 197.352 ppm  
 F1: 19847.24 Hz  
 F2P: 0.113 ppm  
 F2: 11.38 Hz  
 PPMCM: 8.96542 ppm/cm  
 HZCM: 901.63000 Hz/cm

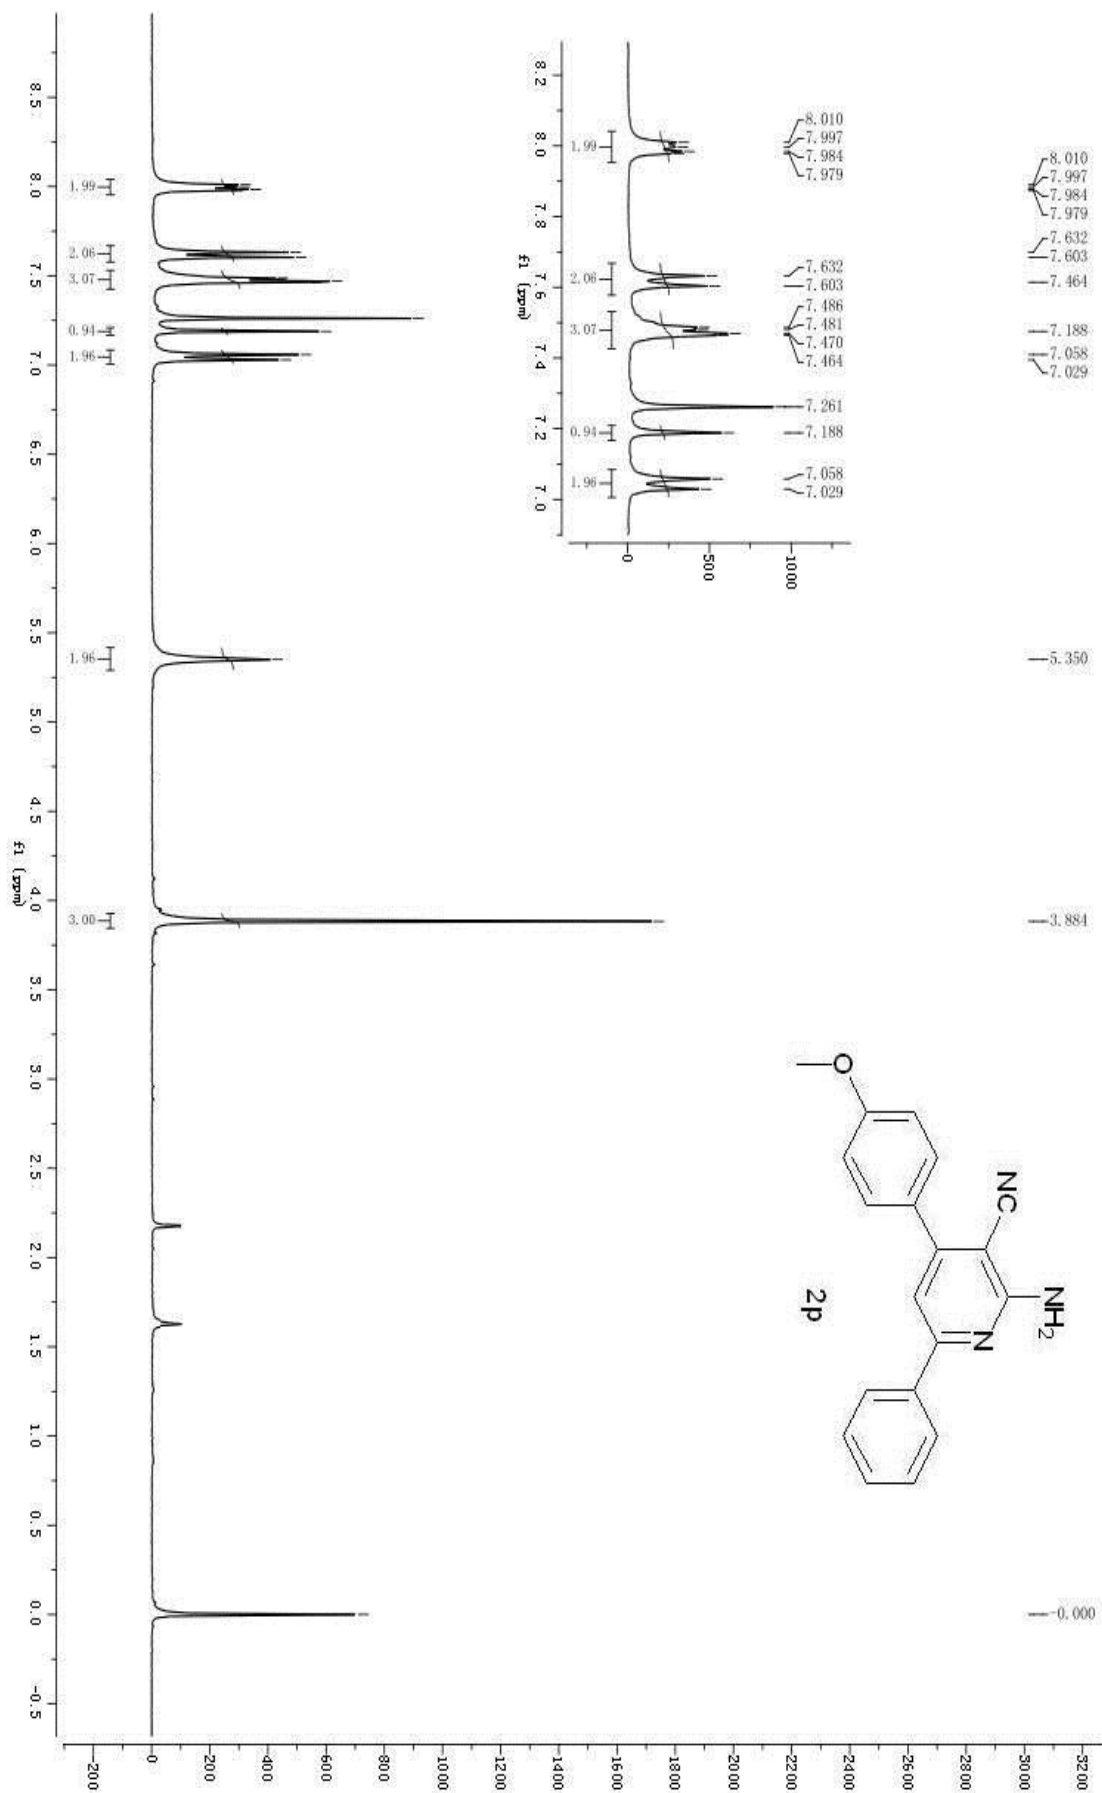



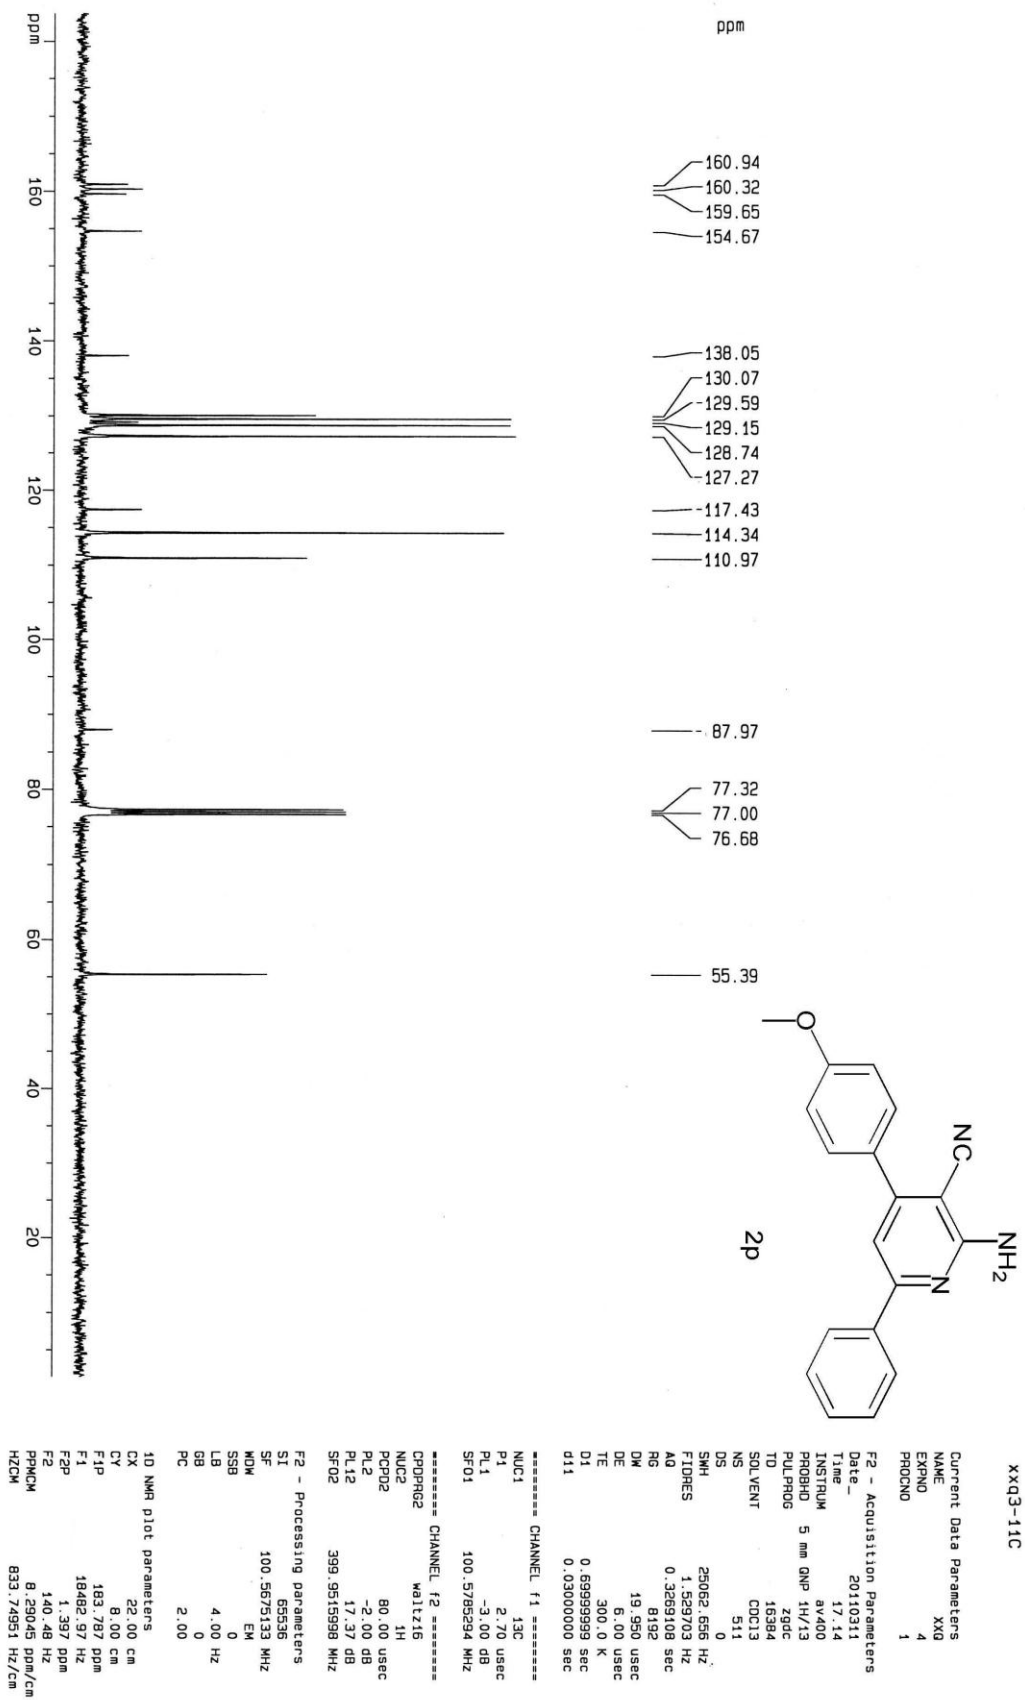

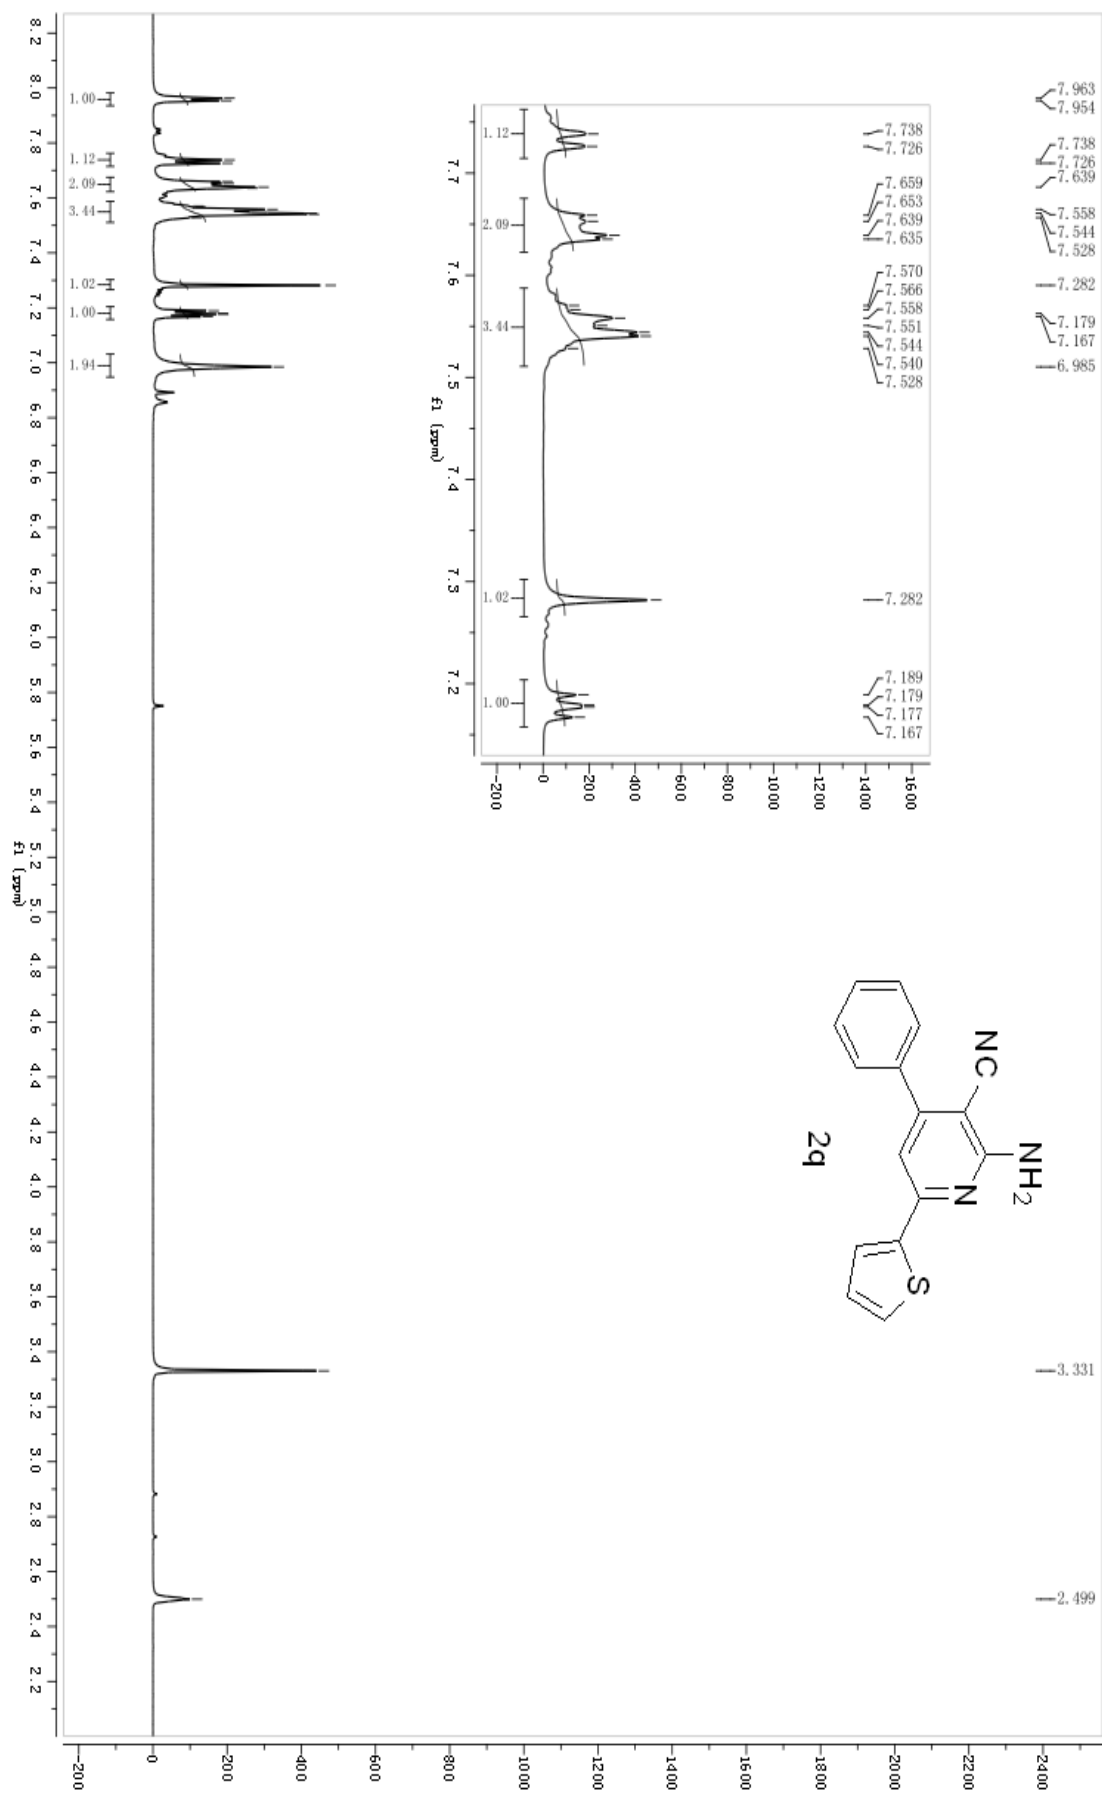

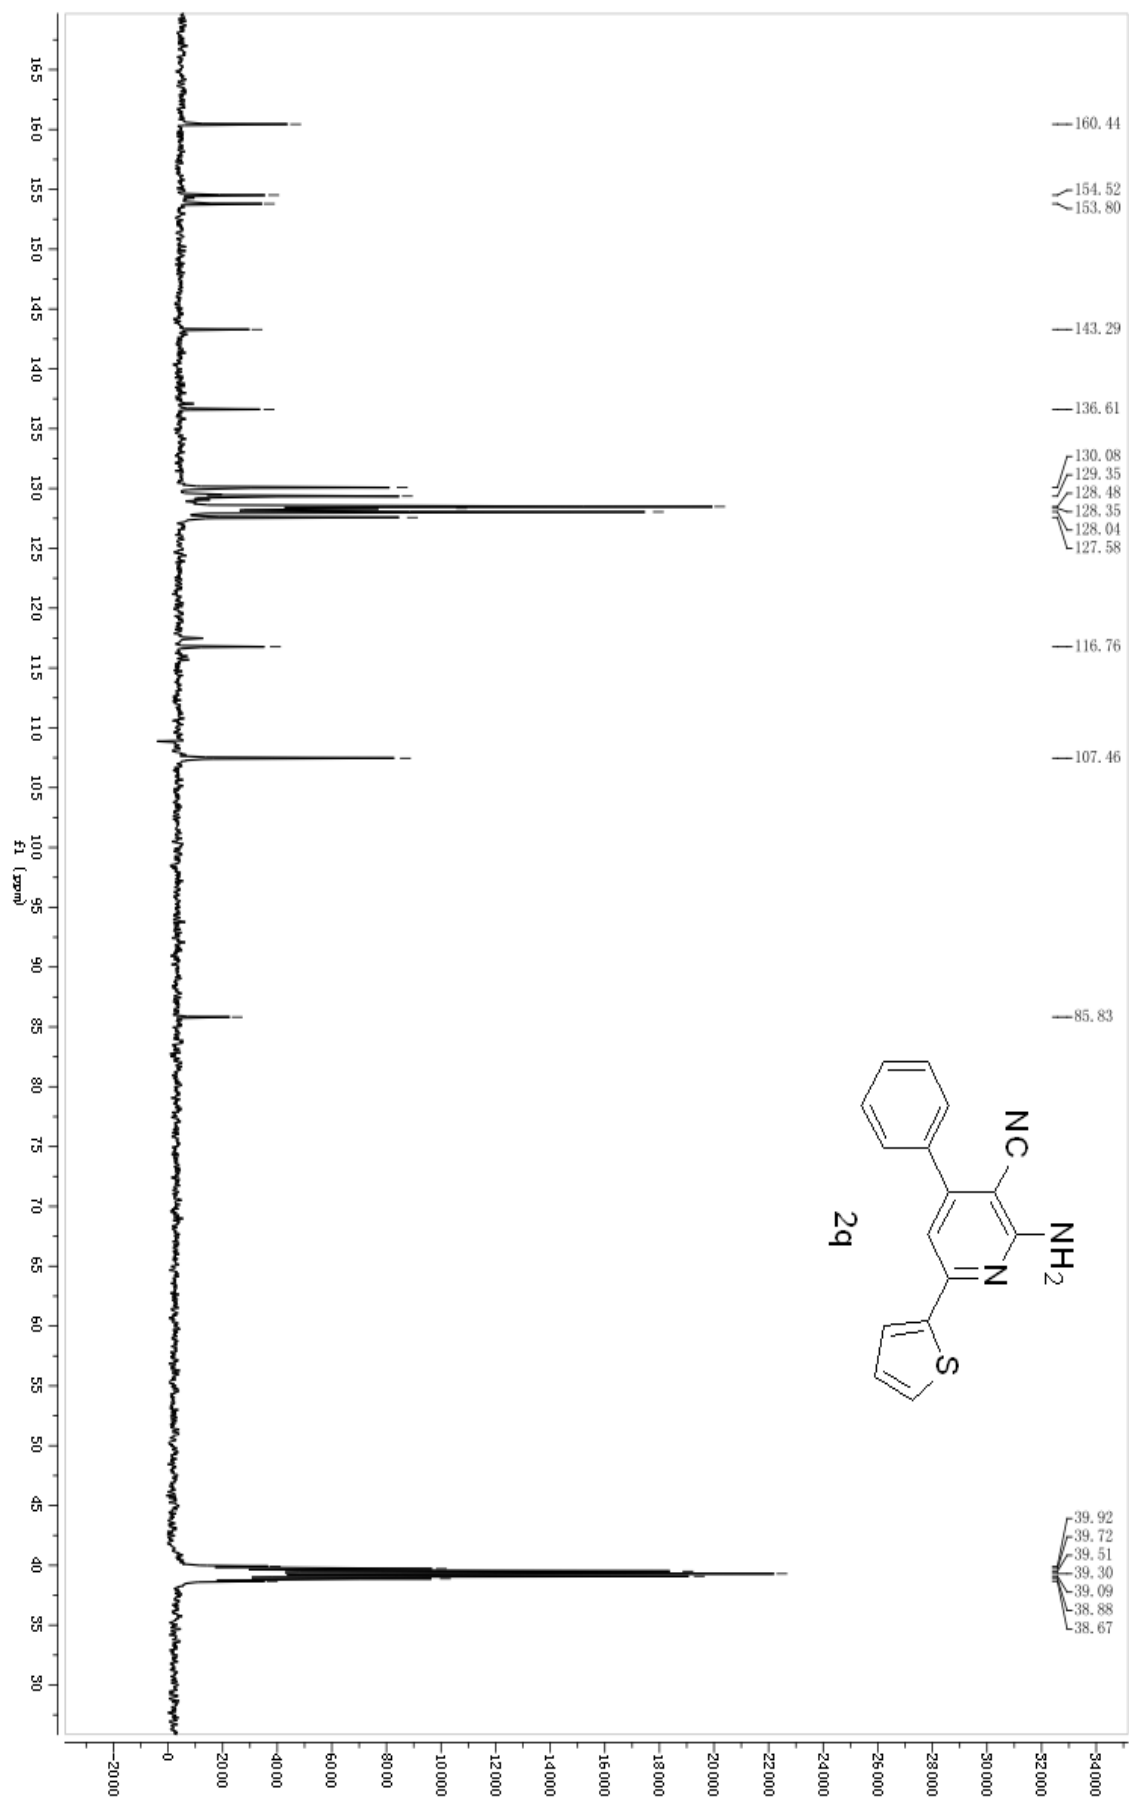

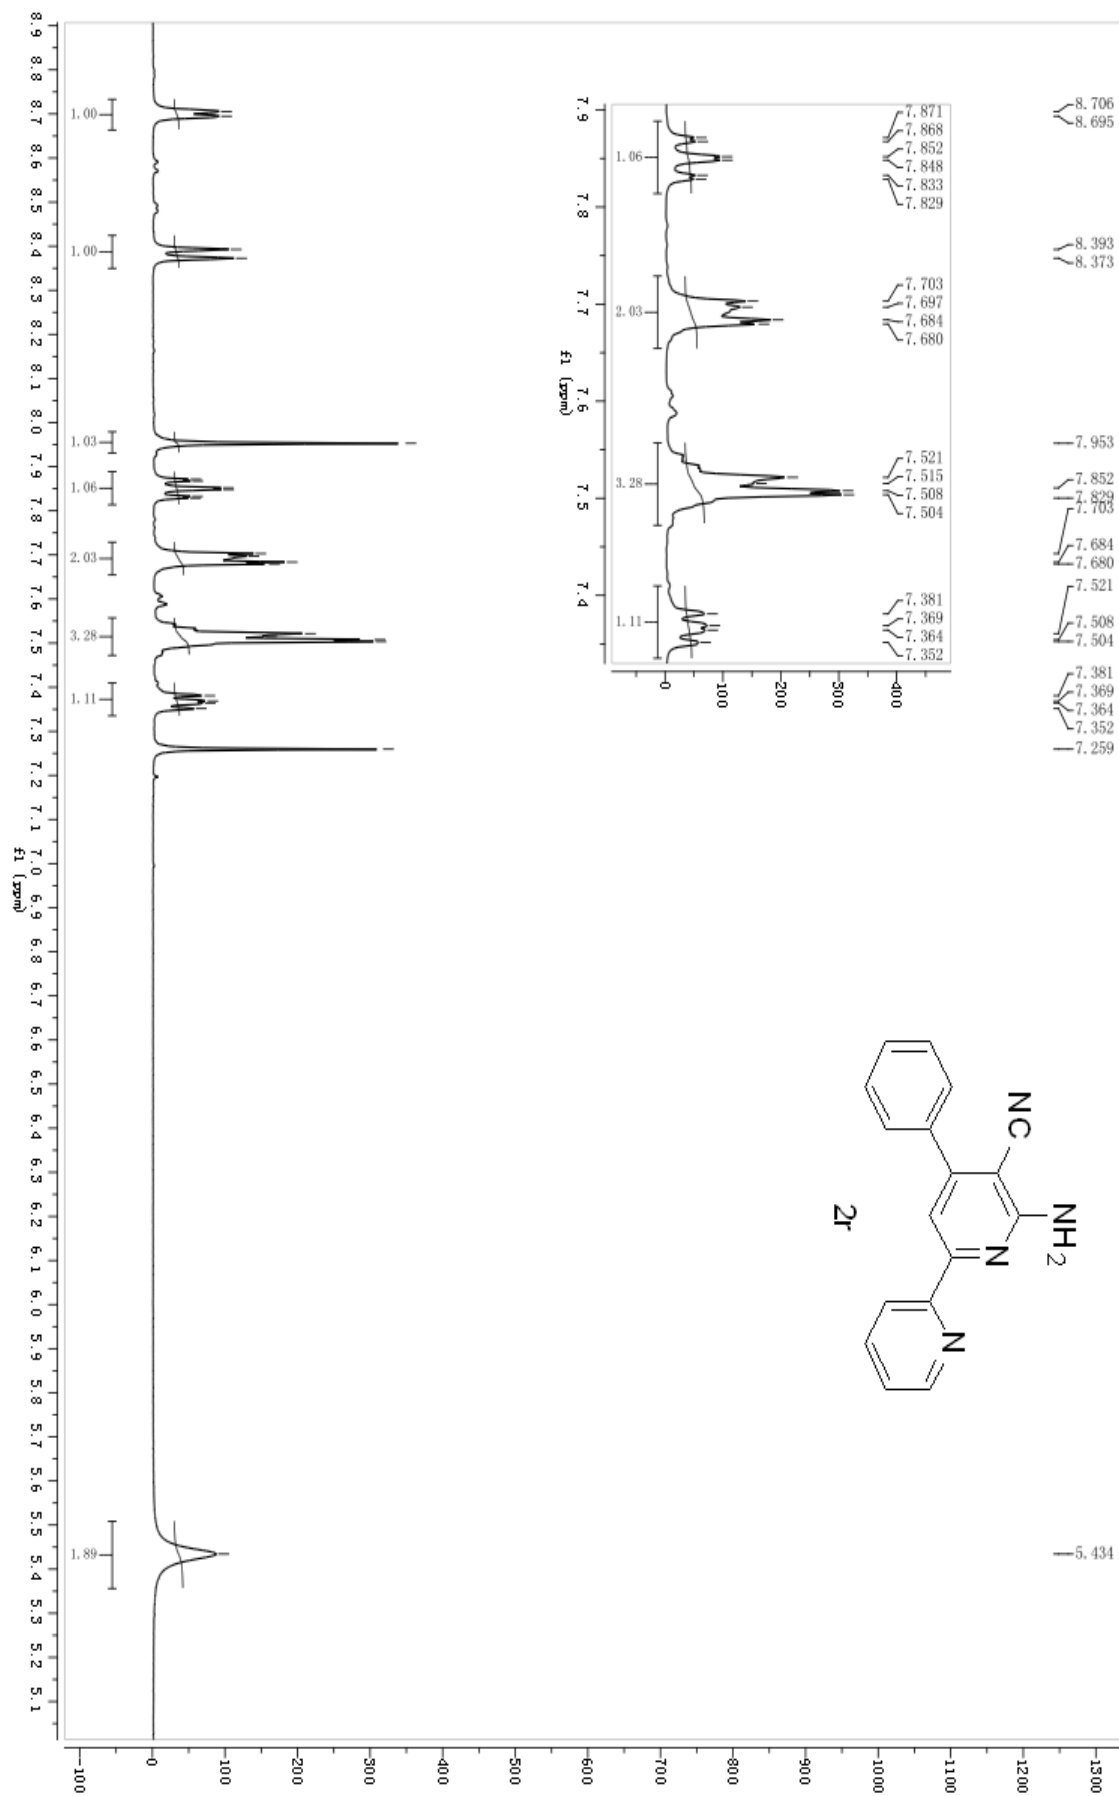

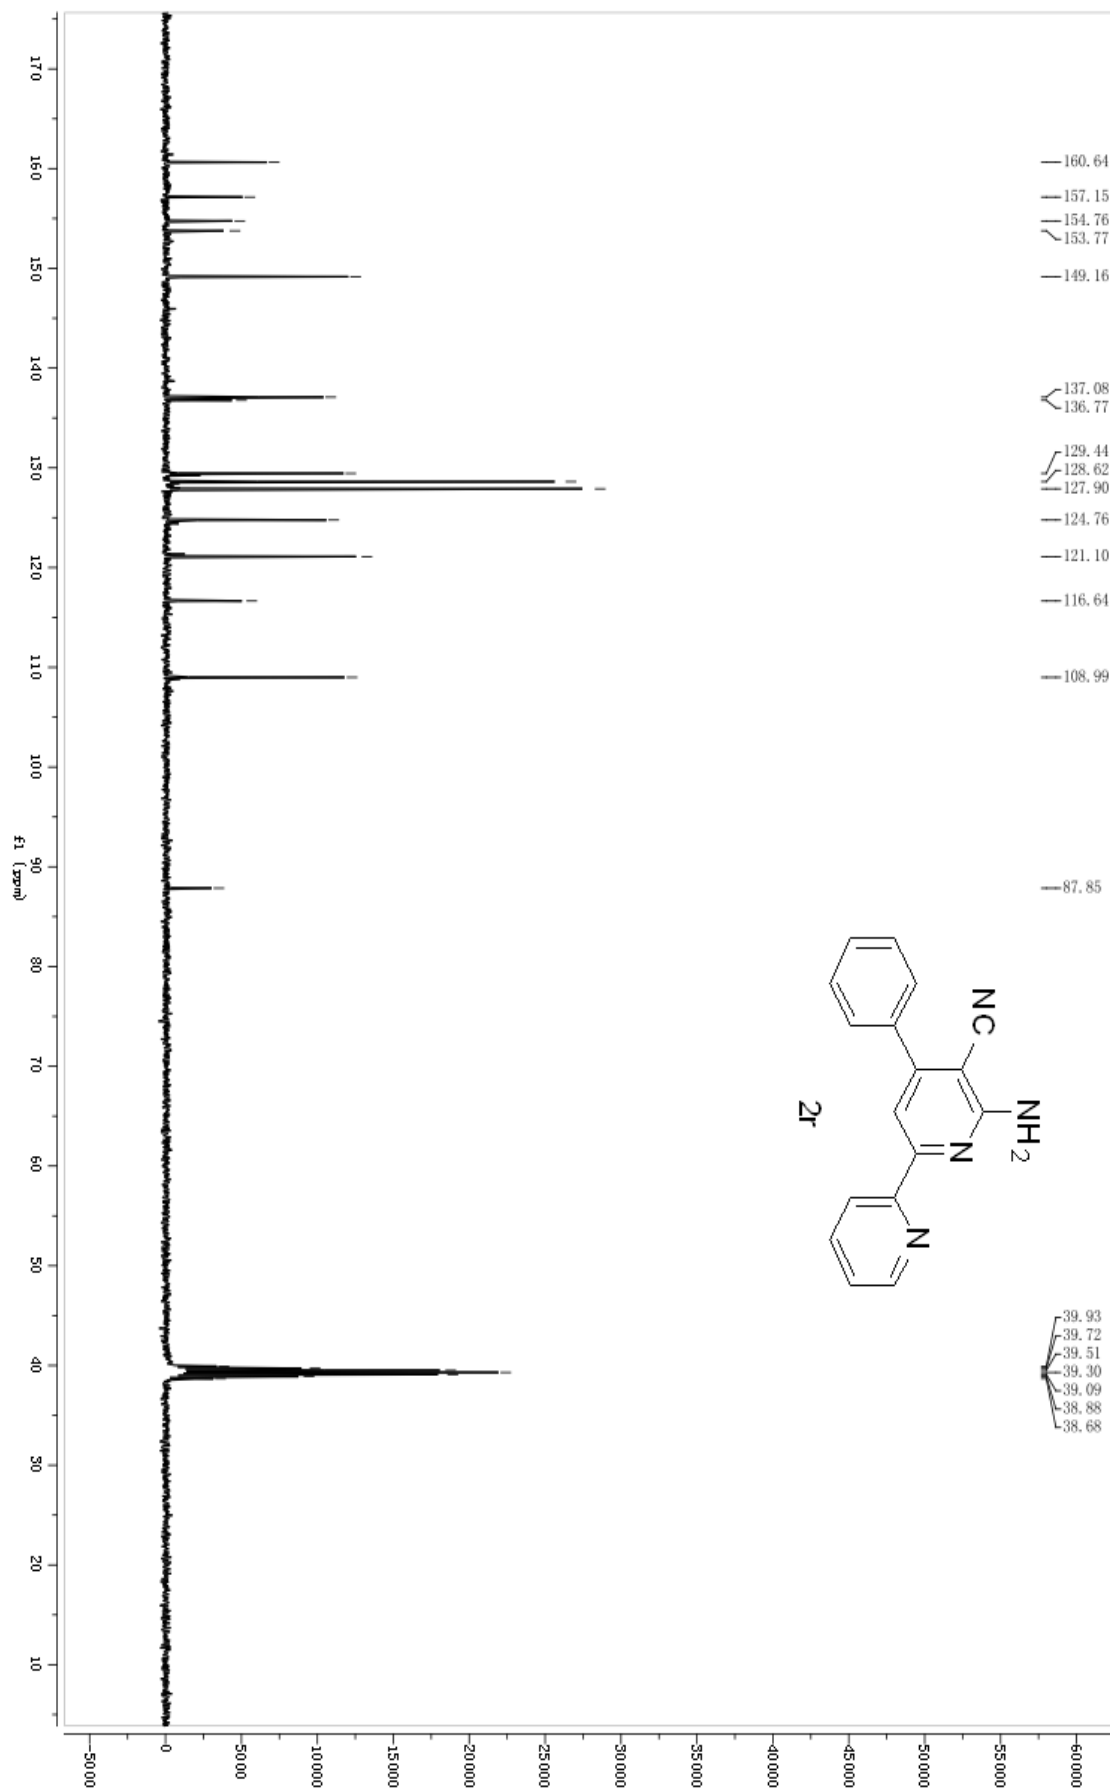

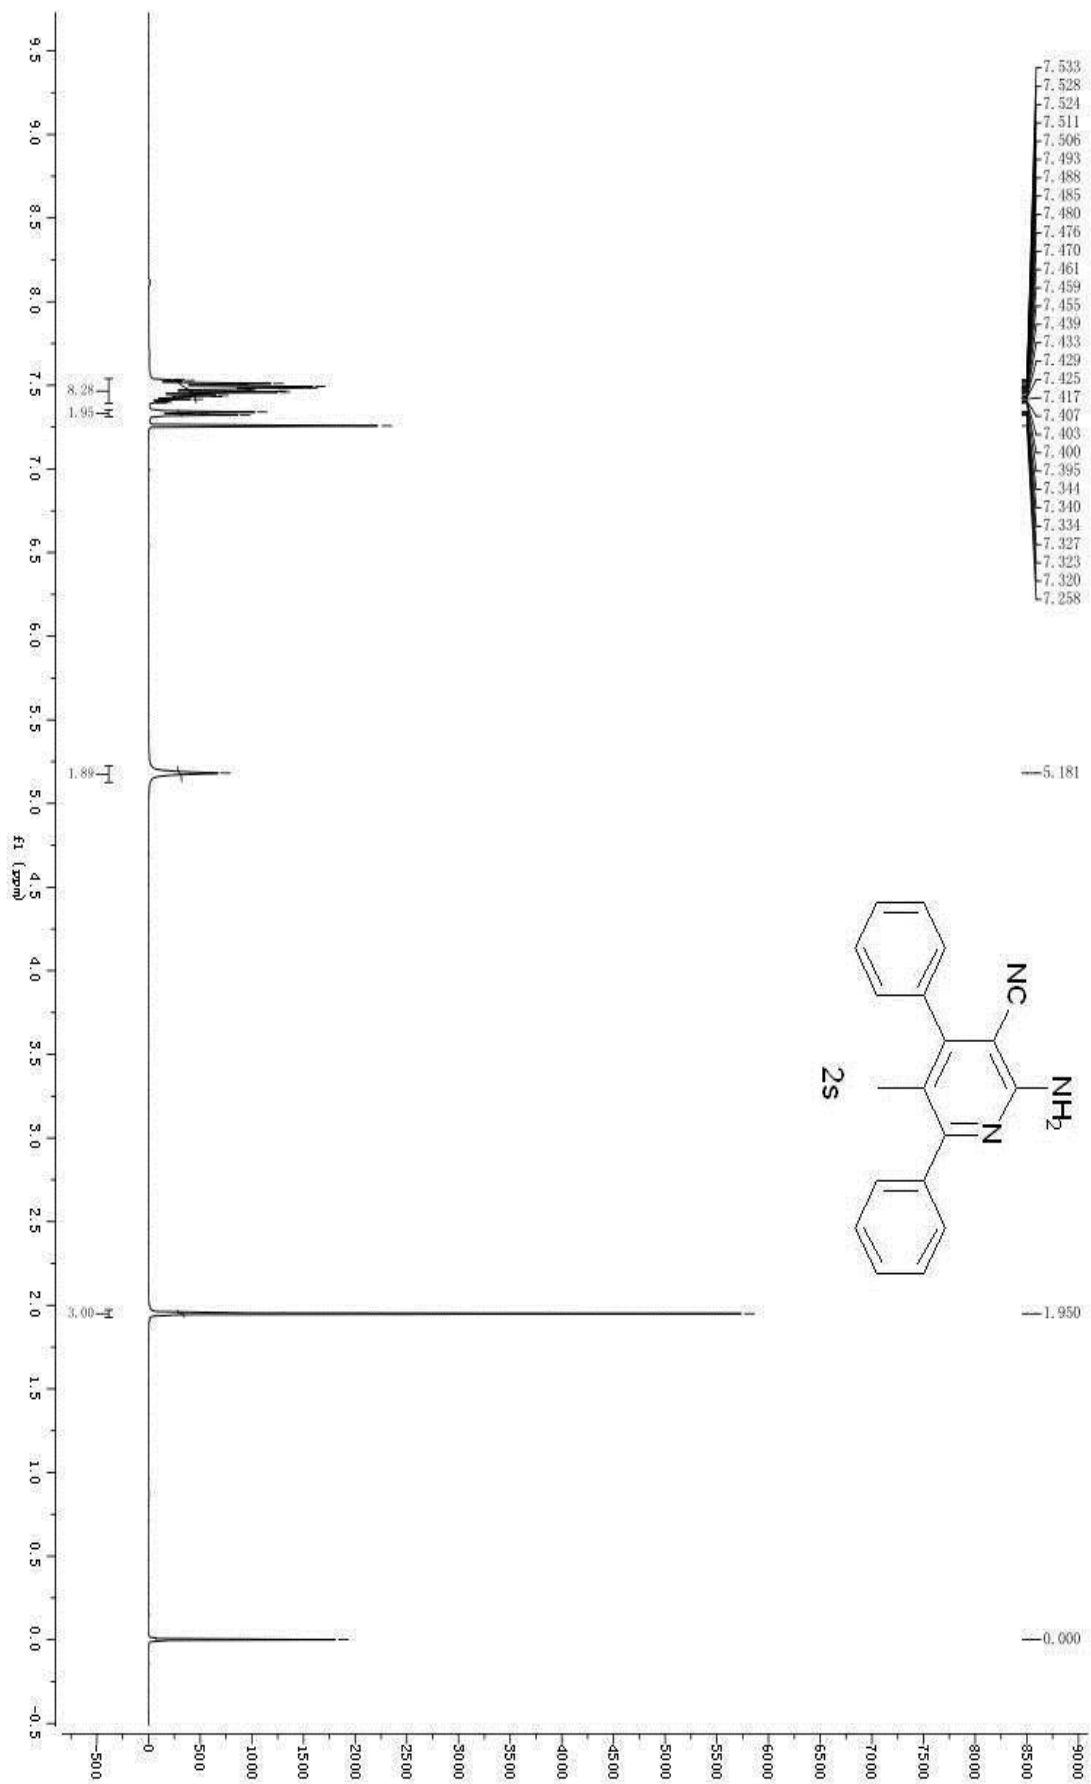

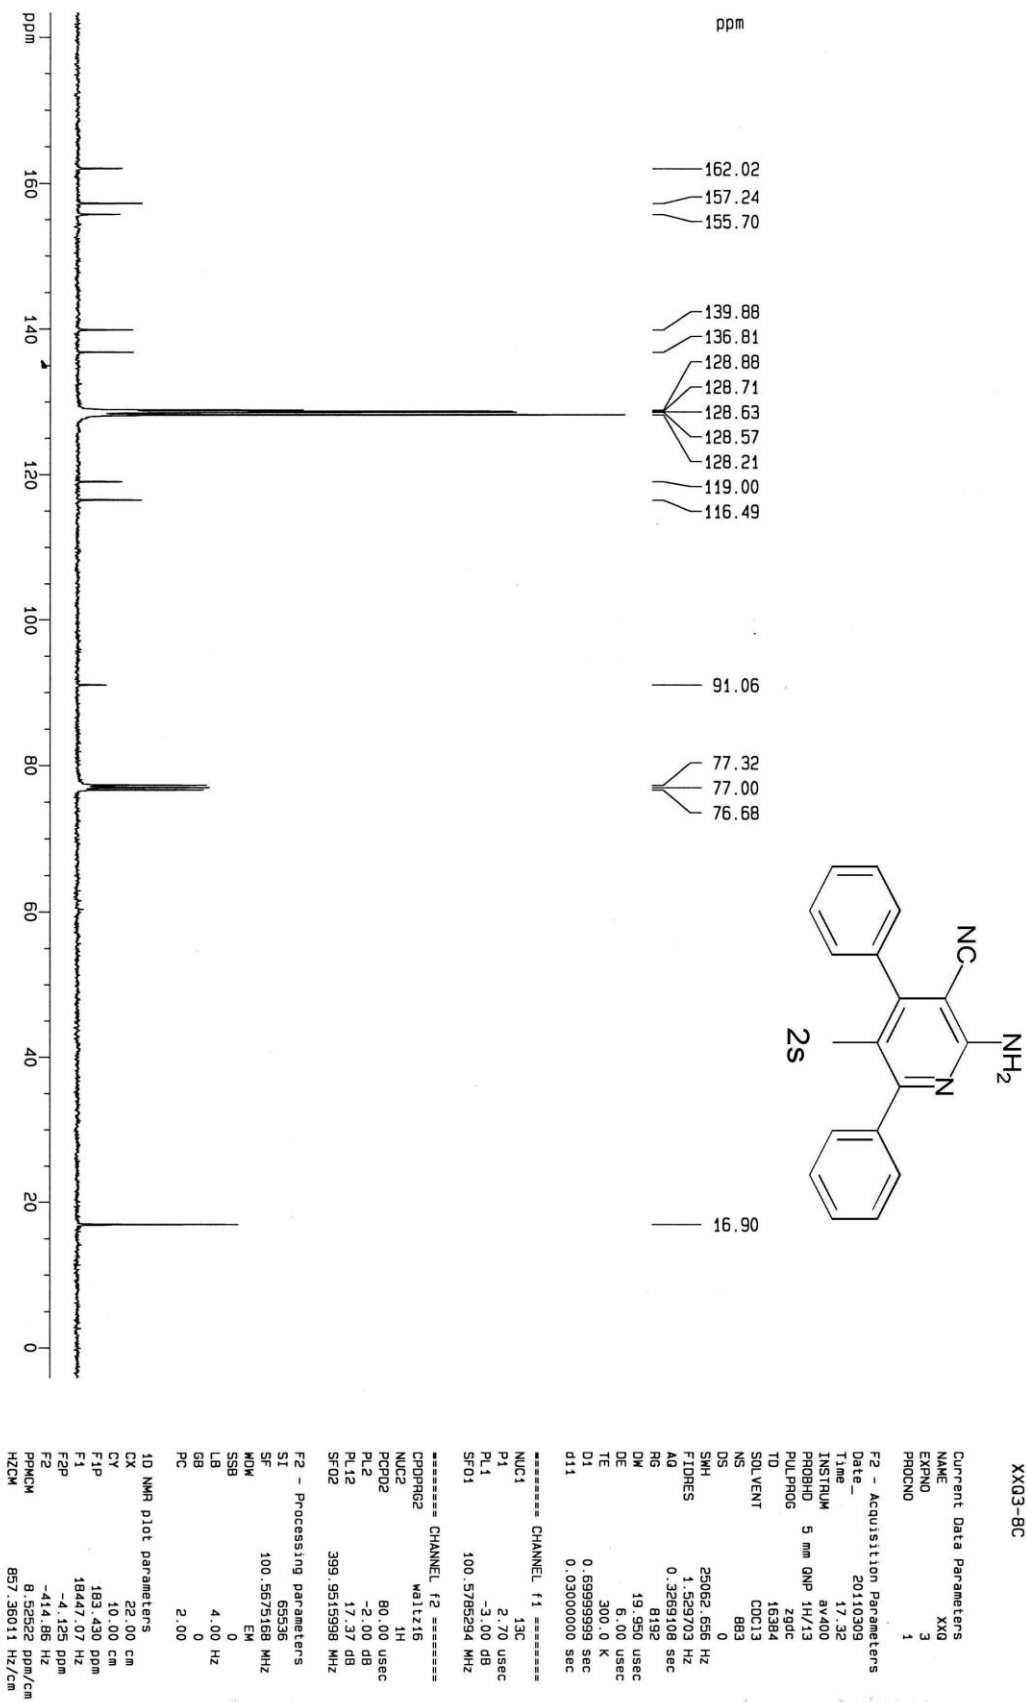

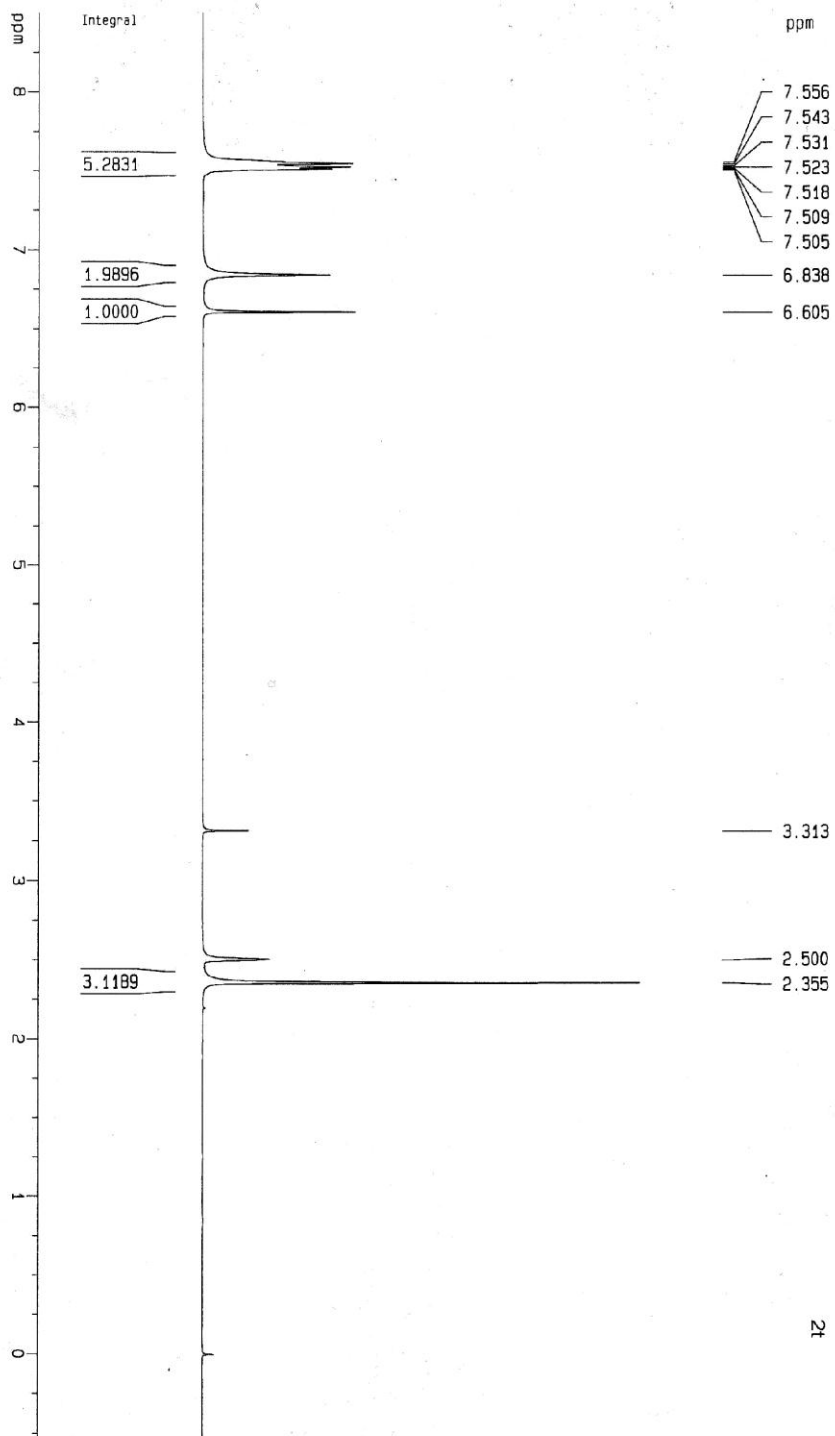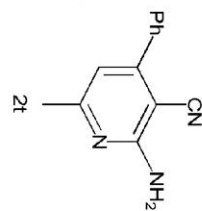

xxd-11-26-1

Current Data Parameters  
 NAME XXX  
 EXPNO 1  
 PROCNO 1

F2 - Acquisition Parameters

Date\_ 20121126  
 Time 18.03  
 INSTRUM av400  
 PROBNM 5 mm BBO BB-1H  
 PULPROG zgpg30  
 TD 16384  
 SOLVENT CDCl3  
 NS 8  
 DS 0  
 SMH 5307.855 Hz  
 FIDRES 0.323965 Hz  
 AQ 1.5434228 sec  
 RG 16  
 DE 94.200 usec  
 TE 313.0 K  
 D1 10.00000000 sec

CHANNEL f1  
 NUC1 1H  
 P1 8.60 usec  
 PL1 -3.00 dB  
 SFO1 399.9518697 MHz

F2 - Processing parameters

SF 399.9500033 MHz  
 MDW 65536  
 SSB EM  
 LB 0  
 GB 0.50 Hz  
 PC 1.00

1D NMR plot parameters

CX 23.00 cm  
 CY 8.00 cm  
 F1P 8.499 ppm  
 F1 3399.37 Hz  
 F2P -0.540 ppm  
 F2 -215.91 Hz  
 PPMICM 0.39301 ppm/C  
 HZCM 157.18611 Hz/cm



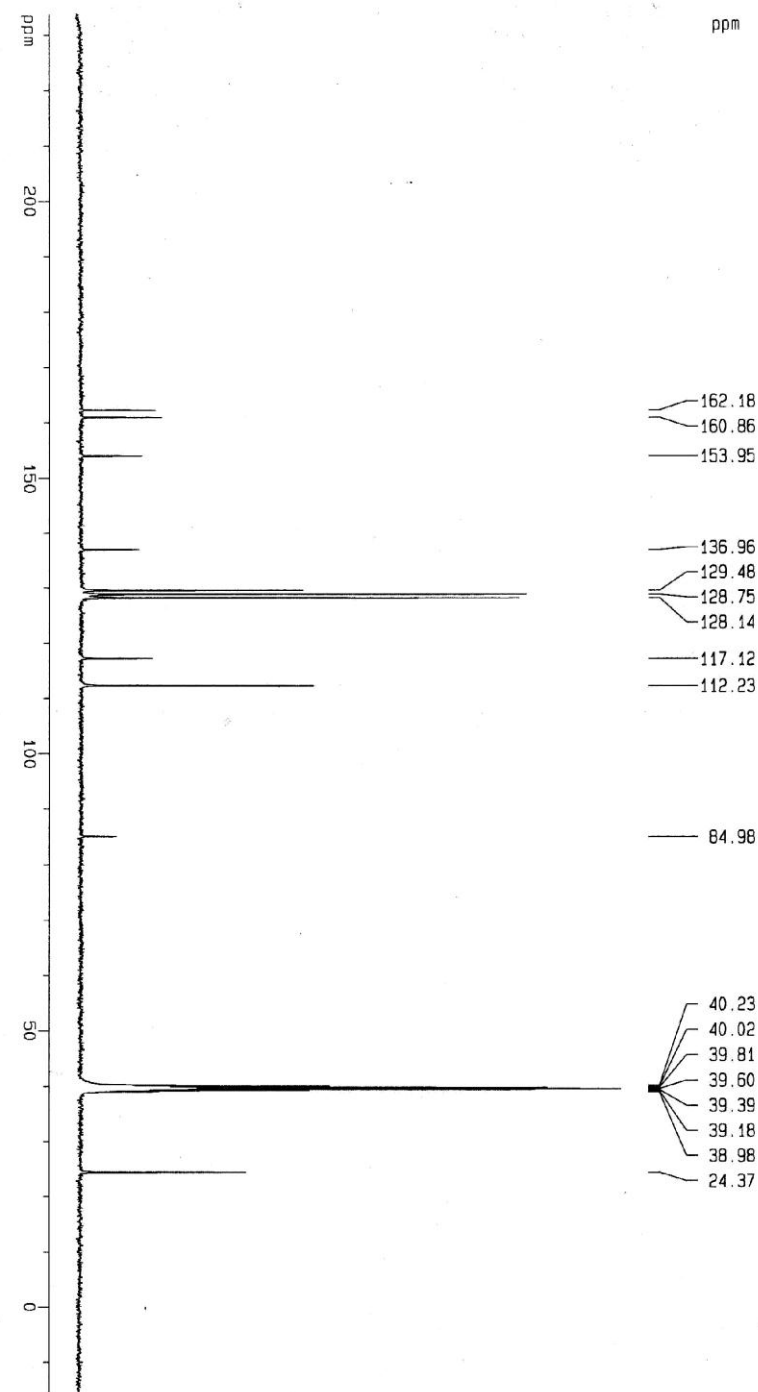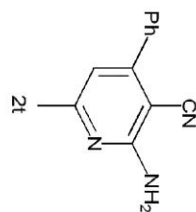

xxq-11-26-1

Current Data Parameters  
 NAME XXQ  
 EXPNO 2  
 PROCNO 1

F2 - Acquisition Parameters  
 Date\_ 20121126  
 Time 18.04  
 INSTRUM av400  
 PROBHD 5 mm BBO BB-1H  
 PULPROG zgpg  
 TD 16384  
 SOLVENT D2O  
 NS 7045  
 DS 0  
 SFO 25062.536 Hz  
 FIDRES 1.529703 Hz  
 AQ 0.3269108 sec  
 RG 8192  
 DW 19.950 usec  
 DE 6.00 usec  
 TE 300.0 K  
 D1 0.50000000 sec  
 d11 0.03000000 sec

===== CHANNEL f1 =====  
 NUC1 13C  
 P1 2.90 usec  
 PL1 -3.00 dB  
 SFO1 100.5785294 MHz

===== CHANNEL f2 =====  
 CPDPRG2 waltz16  
 NUC2 1H  
 PCPD2 80.00 usec  
 PL2 2.00 dB  
 PL12 17.50 dB  
 SFO2 399.9515998 MHz

F2 - Processing parameters  
 SI 65536  
 SF 100.5675505 MHz  
 WDW EM  
 SSB 0  
 LB 4.00 Hz  
 GB 0  
 PC 1.00

1D NMR plot parameters  
 CX 22.00 cm  
 CY 10.00 cm  
 F1P 233.776 ppm  
 F1 23510.28 Hz  
 F2P -15.436 ppm  
 F2 -1552.38 Hz  
 PPM1CM 11.32783 ppm/cm  
 HZ1CM 1139.21167 Hz/cm

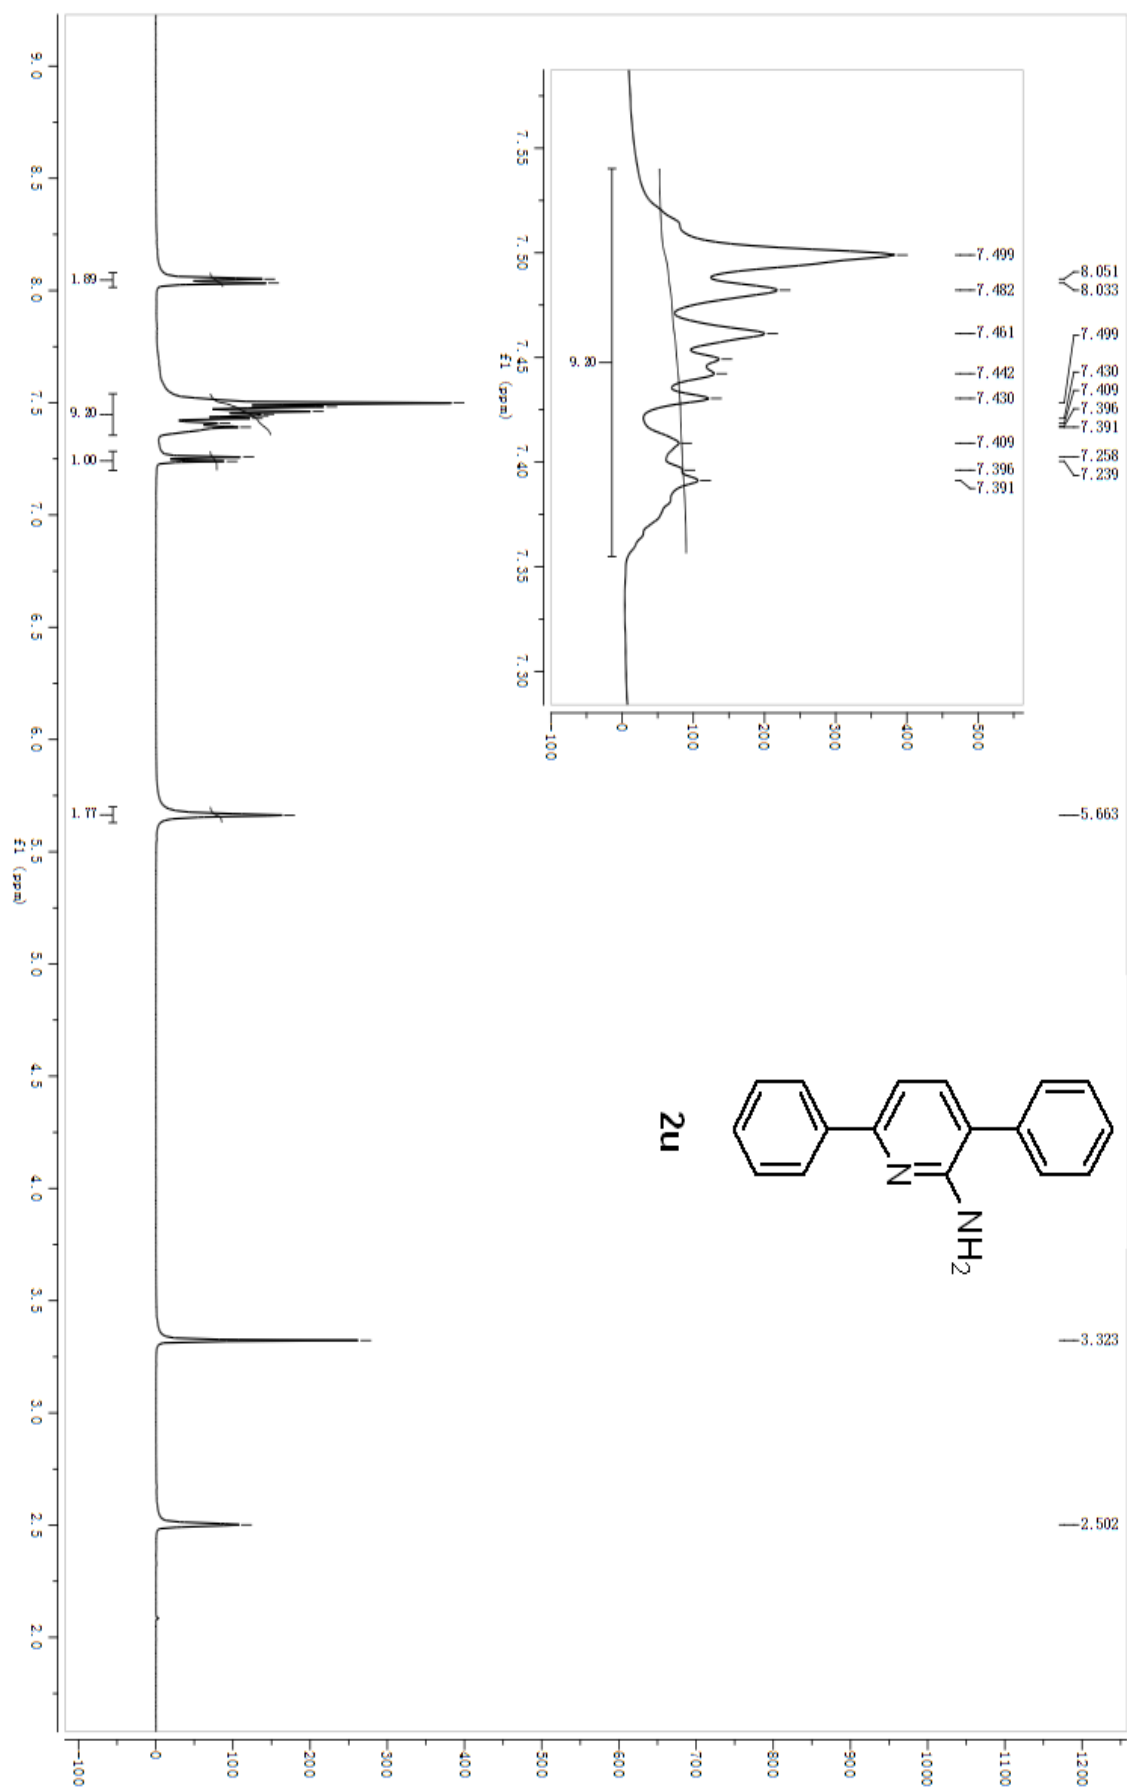

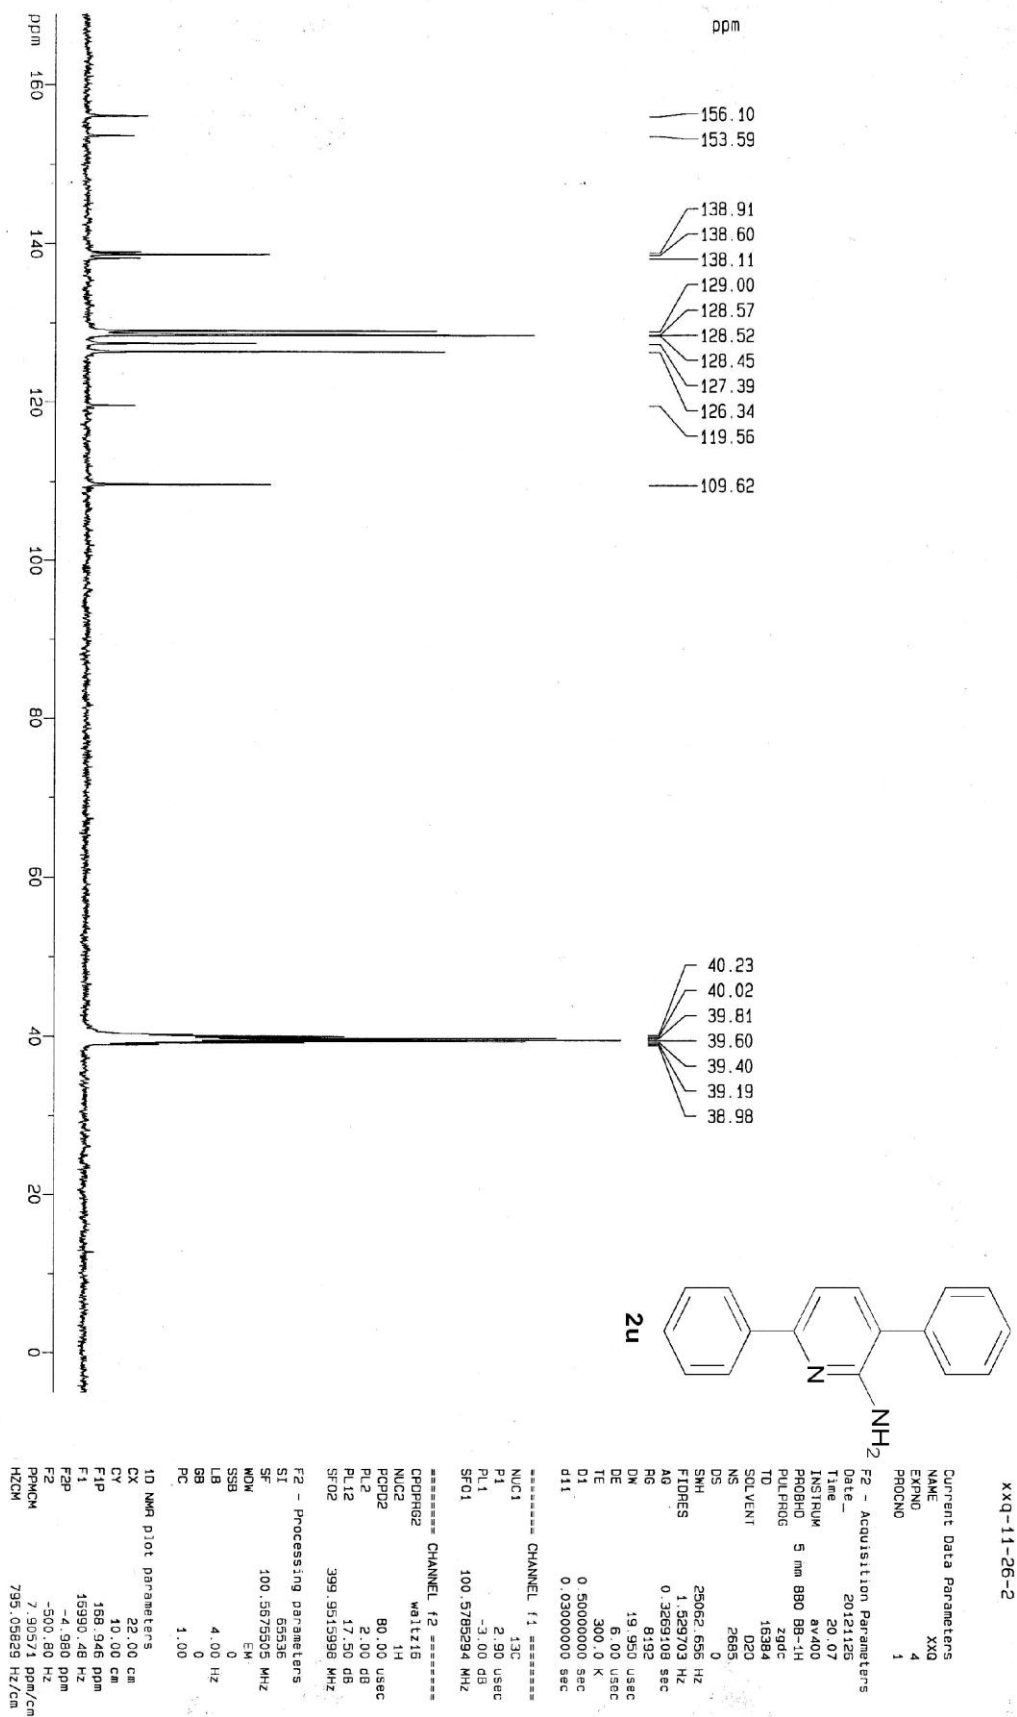

Supplement: c2ob27053f.pdf [file c2ob27053f.pdf]
